# Supplementary material for: Comprehensive cross-sectional and longitudinal analyses of plasma neurofilament light across FTD spectrum disorders
Source: PubMed Central journal article supplement — Cell Rep Med. 2022 Apr 19;3(4):100607. doi: 10.1016/j.xcrm.2022.100607 (PMC9044101; doi:10.1016/j.xcrm.2022.100607), 2022-04-19
Supplement: mmc1.pdf [file mmc1.pdf]

**Supplemental information**

**Comprehensive cross-sectional and  
longitudinal analyses of plasma neurofilament  
light across FTD spectrum disorders**

**Tania F. Gendron, Michael G. Heckman, Launia J. White, Austin M. Veire, Otto Pedraza, Alexander R. Burch, Andrea C. Bozoki, Bradford C. Dickerson, Kimiko Domoto-Reilly, Tatiana Foroud, Leah K. Forsberg, Douglas R. Galasko, Nupur Ghoshal, Neill R. Graff-Radford, Murray Grossman, Hilary W. Heuer, Edward D. Huey, Ging-Yuek R. Hsiung, David J. Irwin, Daniel I. Kaufer, Gabriel C. Leger, Irene Litvan, Joseph C. Masdeu, Mario F. Mendez, Chiadi U. Onyike, Belen Pascual, Aaron Ritter, Erik D. Roberson, Julio C. Rojas, Maria Carmela Tartaglia, Zbigniew K. Wszolek, Howard Rosen, Bradley F. Boeve, Adam L. Boxer, ALLFTD consortium, and Leonard Petrucelli**

## **Supplemental information**

### **Comprehensive cross-sectional and longitudinal analyses of plasma neurofilament light across FTD spectrum disorders**

#### **Authors**

Tania F. Gendron, Michael G. Heckman, Launia White, Austin M. Veire, Otto Pedraza, Alexander R. Burch, Andrea C. Bozoki, Bradford C. Dickerson, Kimiko Domoto-Reilly, Tatiana Foroud, Leah K. Forsberg, Douglas R. Galasko, Nupur Ghoshal, Neill R. Graff-Radford, Murray Grossman, Hilary W. Heuer, Edward D. Huey, Ging-Yuek R. Hsiung, David J. Irwin, Daniel I. Kaufer, Gabriel C. Leger, Irene Litvan, Joseph C. Masdeu, Mario F. Mendez, Chiadi U. Onyike, Belen Pascual, Aaron Ritter, Erik D. Roberson, Julio C. Rojas, Maria Carmela Tartaglia, Zbigniew K. Wszolek, Howard Rosen, Bradley F. Boeve, Adam L. Boxer, Leonard Petrucelli, and the ALLFTD Consortium

Supplemental figure

**A**

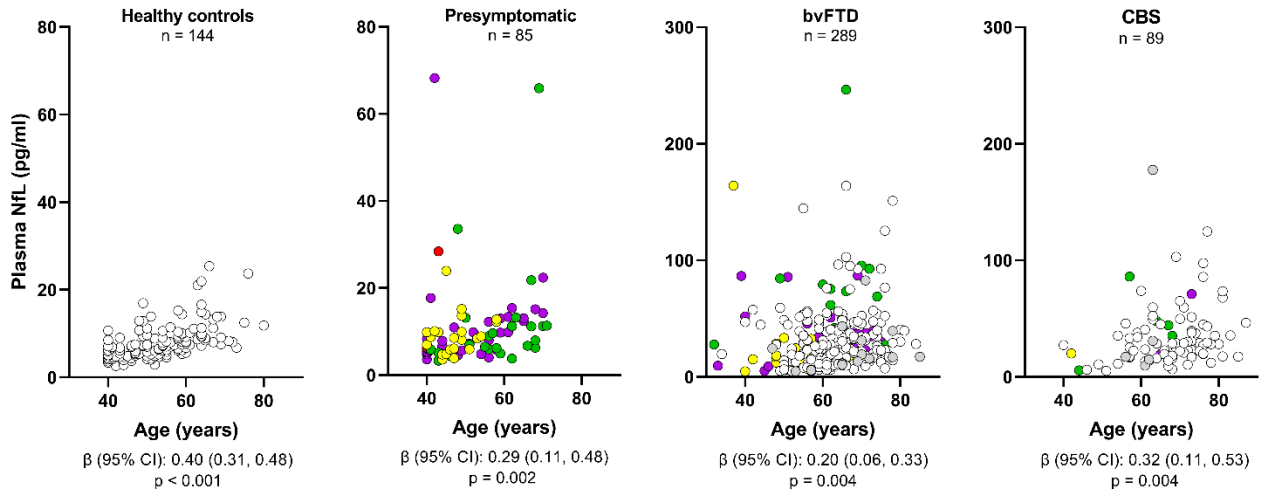

**B**

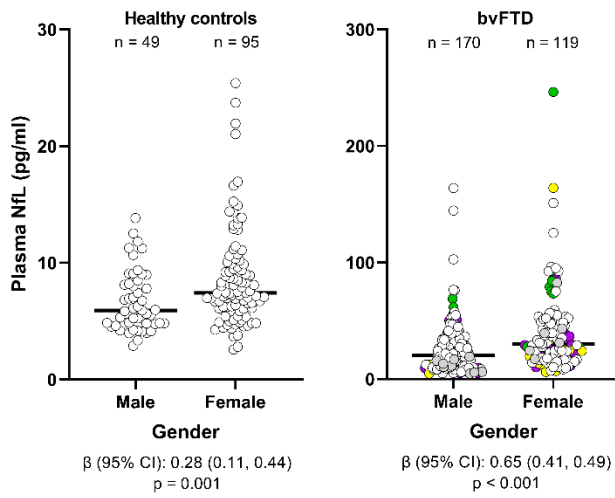

**C**

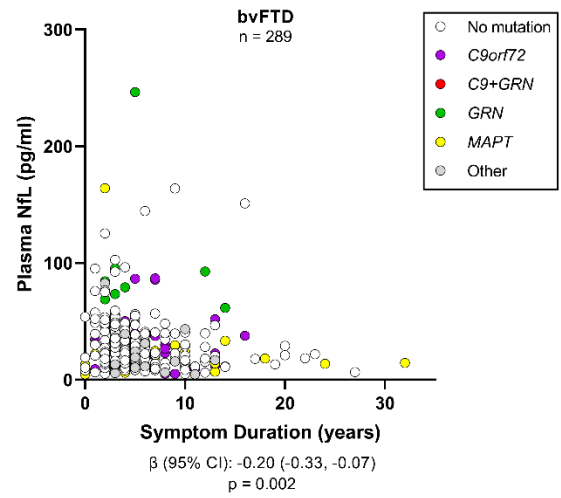

**D**

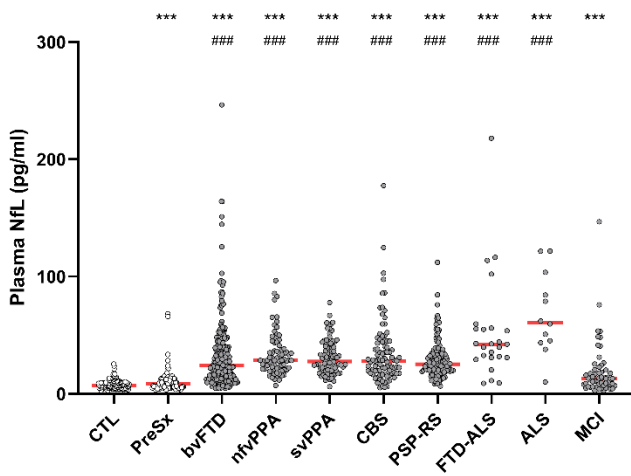

**E**

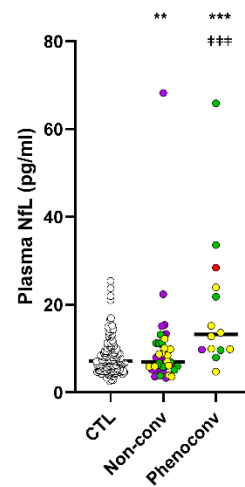

**Figure S1. Plasma NfL associates with age, gender and symptom duration in some phenotype groups, and is elevated in presymptomatic mutation carriers and symptomatic groups, Related to Figures 2A and 2B, and to Tables S3–S5 and S7.** (A-C) Associations of baseline NfL concentrations (the mean of duplicate measures) with age (A), gender (B) and symptom duration (C) were assessed using linear regression models adjusted for age, gender and symptom duration.  $\beta$  coefficients ( $\beta$ ), 95% confidence intervals (95% CI) and p values are shown for significant associations. Grey circles represent 11 bvFTD patients and five CBS patients with unknown mutation status, one bvFTD patient with a likely pathogenic *GRN* variant and three with a *TARDBP* mutation, and one CBS patient with an intermediate *C9orf72* repeat expansion. See **Figure 1** to view NfL concentrations on the base 10 logarithm scale and see **Table S2**. (D, E) Comparison of baseline plasma NfL between healthy controls or presymptomatic mutation carriers and symptomatic groups (D), and between presymptomatic carriers who phenoconverted to controls or to presymptomatic carriers who remained asymptomatic for at least one year (E). p values are from analysis adjusted for age and gender. \*\*\*p < 0.001 and \*\*p < 0.01, comparison to controls; ###p < 0.001 comparison to presymptomatic carriers; #p < 0.001, comparison to presymptomatic non-converters. Horizontal bars represent median NfL concentrations. See Figures 2A and 2B to view NfL concentrations on the base 10 logarithm scale, and see Tables S3–S5, S7.

## Supplemental tables

**Table S1: Breakdown of baseline and longitudinal plasma NfL measures and rates of NfL change in phenotype groups, Related to Table 1**

| Phenotype group                        | Number of individuals with baseline plasma NfL | Number of individuals with longitudinal plasma samples | Number of individuals for whom rates of NfL change could be calculated <sup>4</sup> |
|----------------------------------------|------------------------------------------------|--------------------------------------------------------|-------------------------------------------------------------------------------------|
| Controls                               | 144                                            | 79                                                     | 69                                                                                  |
| All presymptomatic mutation carriers   | 85                                             | 58                                                     | 52                                                                                  |
| Non-converters <sup>1</sup>            | 43                                             | 35                                                     | 35                                                                                  |
| Phenoconverters <sup>2</sup>           | 14                                             | 14                                                     | 14                                                                                  |
| Unknown conversion status <sup>3</sup> | 28                                             | 9                                                      | 3                                                                                   |
| bvFTD                                  | 289                                            | 39                                                     | 35                                                                                  |
| nfvPPA                                 | 72                                             | 10                                                     | 7                                                                                   |
| svPPA                                  | 84                                             | 2                                                      | 2                                                                                   |
| CBS                                    | 89                                             | 14                                                     | 6                                                                                   |
| PSP-RS                                 | 124                                            | 10                                                     | 3                                                                                   |
| MCI                                    | 57                                             | 18                                                     | 18                                                                                  |

<sup>1</sup>Non-converters were presymptomatic at baseline and known to have remained asymptomatic for at least one year from baseline. <sup>2</sup>Phenoconverters were presymptomatic at baseline but subsequently diagnosed as symptomatic at a later visit. Presymptomatic phenoconverters were comprised of one individual with a *C9orf72* mutation who developed MCI, one with both a *C9orf72* and *GRN* mutation diagnosed with nfvPPA at follow-up, five with a *GRN* mutation and seven with a *MAPT* mutation. All *GRN* mutation carriers phenoconverted to MCI with two patients subsequently developing bvFTD. Four *MAPT* mutation carriers were later diagnosed with MCI, two with bvFTD and one with Parkinson's disease. <sup>3</sup>The 28 presymptomatic individuals with an unknown conversion status had insufficient follow-up data to be categorized as a non-converter or a phenoconverter. <sup>4</sup>Rates of NfL change per year were calculated only for individuals with one or more NfL measurements at least one year from the baseline NfL measurement. See also Table 1.

**Table S2: Associations of baseline NfL with age, gender and symptom duration in phenotype groups, Related to Figures 1A–C and Figures S1A–C**

| Phenotype group/association                             | $\beta$ (95% CI)     | p value          |
|---------------------------------------------------------|----------------------|------------------|
| Controls (n = 144)                                      |                      |                  |
| Association with age (per 10 year increase)             | 0.40 (0.31, 0.48)    | <b>&lt;0.001</b> |
| Association with gender (males vs. females)             | 0.28 (0.11, 0.44)    | <b>0.001</b>     |
| Presymptomatic mutation carriers (n = 85)               |                      |                  |
| Association with age (per 10 year increase)             | 0.29 (0.11, 0.48)    | <b>0.002</b>     |
| Association with gender (males vs. females)             | 0.32 (-0.03, 0.67)   | 0.073            |
| bvFTD patients (n = 289)                                |                      |                  |
| Association with age (per 10 year increase)             | 0.20 (0.06, 0.33)    | <b>0.004</b>     |
| Association with gender (males vs. females)             | 0.65 (0.41, 0.89)    | <b>&lt;0.001</b> |
| Association with symptom duration (per 5 year increase) | -0.20 (-0.33, -0.07) | <b>0.002</b>     |
| nfvPPA patients (n = 71)                                |                      |                  |
| Association with age (per 10 year increase)             | 0.03 (-0.19, 0.25)   | 0.78             |
| Association with gender (males vs. females)             | 0.38 (0.02, 0.74)    | 0.038            |
| Association with symptom duration (per 5 year increase) | -0.18 (-0.56, 0.21)  | 0.36             |
| svPPA patients (n = 84)                                 |                      |                  |
| Association with age (per 10 year increase)             | 0.22 (0.00, 0.43)    | 0.048            |
| Association with gender (males vs. females)             | 0.14 (-0.16, 0.43)   | 0.36             |
| Association with symptom duration (per 5 year increase) | -0.15 (-0.33, 0.02)  | 0.086            |
| CBS patients (n = 89)                                   |                      |                  |
| Association with age (per 10 year increase)             | 0.32 (0.11, 0.53)    | <b>0.004</b>     |
| Association with gender (males vs. females)             | 0.10 (-0.31, 0.52)   | 0.62             |
| Association with symptom duration (per 5 year increase) | 0.07 (-0.15, 0.29)   | 0.51             |
| PSP-RS patients (n = 124)                               |                      |                  |
| Association with age (per 10 year increase)             | 0.03 (-0.16, 0.23)   | 0.75             |
| Association with gender (males vs. females)             | 0.27 (0.00, 0.54)    | 0.049            |
| Association with symptom duration (per 5 year increase) | -0.05 (-0.25, 0.16)  | 0.65             |
| FTD/ALS patients (n = 23)                               |                      |                  |
| Association with age (per 10 year increase)             | 0.11 (-0.39, 0.61)   | 0.65             |
| Association with gender (males vs. females)             | 0.35 (-0.42, 1.13)   | 0.35             |
| Association with symptom duration (per 5 year increase) | -0.54 (-1.08, 0.01)  | 0.053            |
| ALS patients (n = 12)                                   |                      |                  |
| Association with age (per 10 year increase)             | 0.11 (-1.12, 1.33)   | 0.85             |
| Association with gender (males vs. females)             | -0.88 (-2.46, 0.70)  | 0.24             |
| Association with symptom duration (per 5 year increase) | -0.51 (-1.91, 0.88)  | 0.42             |
| MCI patients (n = 55)                                   |                      |                  |
| Association with age (per 10 year increase)             | 0.33 (0.07, 0.59)    | <b>0.013</b>     |
| Association with gender (males vs. females)             | 0.30 (-0.28, 0.88)   | 0.30             |
| Association with symptom duration (per 5 year increase) | -0.01 (-0.15, 0.14)  | 0.94             |

$\beta$ =regression coefficient; CI=confidence interval.  $\beta$  values, 95% CIs, and p values result from linear regression models that were adjusted for age, gender and symptom duration (only in patients).  $\beta$  values are interpreted as the change in mean NfL concentration (on the base-2 logarithm scale) corresponding to the increase given in parenthesis (for age and symptom duration) or for females in comparison to males (for gender). p values < 0.025 (controls and presymptomatic mutation carriers) or p values <0.0167 (all symptomatic groups) are considered statistically significant after correcting for multiple testing. See also Figures 1A–C and Figures S1A–C.

**Table S3: Comparisons of baseline NfL concentrations between controls or presymptomatic mutation carriers and phenotype groups, Related to Figures 2A, 2D and S1D**

| Phenotype group | n   | Median (min, max)<br>NfL concentration<br>(pg/ml) | Unadjusted analysis |         | Adjusting for age and gender |         | AUC (95% CI)        |                              |
|-----------------|-----|---------------------------------------------------|---------------------|---------|------------------------------|---------|---------------------|------------------------------|
|                 |     |                                                   | $\beta$ (95% CI)    | p value | $\beta$ (95% CI)             | p value | Unadjusted analysis | Adjusting for age and gender |
| Controls        | 144 | 7.1 (2.6, 25.4)                                   | 0.00 (reference)    | N/A     | 0.00 (reference)             | N/A     | N/A                 | N/A                          |
| Presymptomatic  | 85  | 8.3 (3.3, 68.2)                                   | 0.25 (0.06, 0.45)   | 0.010   | 0.35 (0.18, 0.52)            | <0.001  | 0.58 (0.50, 0.66)   | 0.64 (0.56, 0.72)            |
| bvFTD           | 289 | 24.2 (4.7, 246.4)                                 | 1.71 (1.52, 1.90)   | <0.001  | 1.64 (1.43, 1.84)            | <0.001  | 0.92 (0.89, 0.94)   | 0.85 (0.82, 0.88)            |
| nfvPPA          | 72  | 28.7 (7.1, 96.5)                                  | 2.05 (1.86, 2.24)   | <0.001  | 1.64 (1.42, 1.85)            | <0.001  | 0.98 (0.96, 1.00)   | 0.87 (0.82, 0.93)            |
| svPPA           | 84  | 27.6 (6.0, 77.7)                                  | 1.94 (1.76, 2.11)   | <0.001  | 1.53 (1.34, 1.72)            | <0.001  | 0.98 (0.96, 1.00)   | 0.89 (0.85, 0.94)            |
| CBS             | 89  | 28.1 (5.3, 177.6)                                 | 1.93 (1.72, 2.14)   | <0.001  | 1.46 (1.23, 1.69)            | <0.001  | 0.95 (0.91, 0.98)   | 0.84 (0.78, 0.89)            |
| PSP-RS          | 124 | 25.3 (6.6, 112.0)                                 | 1.83 (1.67, 1.99)   | <0.001  | 1.46 (1.25, 1.66)            | <0.001  | 0.97 (0.95, 0.99)   | 0.82 (0.77, 0.87)            |
| FTD/ALS         | 25  | 42.3 (8.9, 217.9)                                 | 2.48 (2.18, 2.78)   | <0.001  | 2.31 (2.03, 2.60)            | <0.001  | 0.97 (0.94, 1.00)   | 0.97 (0.95, 1.00)            |
| ALS             | 12  | 60.8 (10.0, 121.7)                                | 2.99 (2.60, 3.38)   | <0.001  | 2.77 (2.43, 3.10)            | <0.001  | 0.98 (0.95, 1.02)   | 0.97 (0.90, 1.03)            |
| MCI             | 57  | 12.9 (2.7, 146.8)                                 | 0.83 (0.58, 1.09)   | <0.001  | 0.66 (0.42, 0.89)            | <0.001  | 0.72 (0.63, 0.81)   | 0.68 (0.59, 0.78)            |
| Presymptomatic  | 85  | 8.3 (3.3, 68.2)                                   | 0.00 (reference)    | N/A     | 0.00 (reference)             | N/A     | N/A                 | N/A                          |
| bvFTD           | 289 | 24.2 (4.7, 246.4)                                 | 1.46 (1.21, 1.71)   | <0.001  | 1.32 (1.06, 1.59)            | <0.001  | 0.86 (0.81, 0.90)   | 0.74 (0.68, 0.80)            |
| nfvPPA          | 72  | 28.7 (7.1, 96.5)                                  | 1.80 (1.54, 2.05)   | <0.001  | 1.48 (1.14, 1.81)            | <0.001  | 0.94 (0.90, 0.98)   | 0.75 (0.68, 0.83)            |
| svPPA           | 84  | 27.6 (6.0, 77.7)                                  | 1.68 (1.44, 1.92)   | <0.001  | 1.32 (1.02, 1.61)            | <0.001  | 0.93 (0.89, 0.97)   | 0.78 (0.71, 0.86)            |
| CBS             | 89  | 28.1 (5.3, 177.6)                                 | 1.68 (1.40, 1.96)   | <0.001  | 1.21 (0.88, 1.55)            | <0.001  | 0.90 (0.85, 0.95)   | 0.72 (0.65, 0.80)            |
| PSP-RS          | 124 | 25.3 (6.6, 112.0)                                 | 1.58 (1.36, 1.79)   | <0.001  | 1.29 (0.98, 1.59)            | <0.001  | 0.92 (0.87, 0.96)   | 0.69 (0.62, 0.76)            |
| FTD/ALS         | 25  | 42.3 (8.9, 217.9)                                 | 2.23 (1.82, 2.64)   | <0.001  | 2.09 (1.65, 2.52)            | <0.001  | 0.93 (0.87, 0.99)   | 0.91 (0.85, 0.97)            |
| ALS             | 12  | 60.8 (10.0, 121.7)                                | 2.74 (2.20, 3.27)   | <0.001  | 2.53 (1.99, 3.08)            | <0.001  | 0.96 (0.90, 1.02)   | 0.93 (0.83, 1.03)            |
| MCI             | 57  | 12.9 (2.7, 146.8)                                 | 0.58 (0.24, 0.92)   | 0.001   | 0.35 (0.01, 0.68)            | 0.045   | 0.65 (0.55, 0.75)   | 0.57 (0.47, 0.68)            |

$\beta$ =regression coefficient; CI=confidence interval.  $\beta$  values, 95% CIs, and p values result from linear regression models.  $\beta$  values are interpreted as the difference in the mean NfL concentration (on the base-2 logarithm scale) for the given phenotype group in comparison to controls or presymptomatic mutation carriers. p values < 0.0056 and < 0.0063 are considered statistically significant after correcting for the comparisons of NfL between controls and 9 different overall phenotype groups or presymptomatic mutation carriers and 8 different phenotype groups, respectively. AUC, area under the receiver operating characteristic curve. See also Figures 2A, 2D and S1D.

**Table S4: Comparisons of baseline NfL concentrations between controls or presymptomatic mutation carriers and phenotype groups when stratifying by symptom duration, Related to Figures 2A, 2D and S1D**

| Phenotype group                 | n   | Median (min, max) NfL concentration (pg/ml) | Unadjusted analysis |         | Adjusting for age and gender |         | AUC (95% CI)        |                              |
|---------------------------------|-----|---------------------------------------------|---------------------|---------|------------------------------|---------|---------------------|------------------------------|
|                                 |     |                                             | $\beta$ (95% CI)    | p value | $\beta$ (95% CI)             | p value | Unadjusted analysis | Adjusting for age and gender |
| Controls                        | 144 | 7.1 (2.6, 25.4)                             | 0.00 (reference)    | N/A     | 0.00 (reference)             | N/A     | N/A                 | N/A                          |
| bvFTD                           |     |                                             |                     |         |                              |         |                     |                              |
| Symptom duration $\leq 5$ years | 186 | 26.9 (4.7, 246.4)                           | 1.84 (1.64, 2.03)   | <0.001  | 1.74 (1.54, 1.94)            | <0.001  | 0.93 (0.90, 0.96)   | 0.89 (0.85, 0.92)            |
| Symptom duration >5 years       | 103 | 20.4 (4.7, 163.9)                           | 1.48 (1.27, 1.70)   | <0.001  | 1.24 (1.00, 1.47)            | <0.001  | 0.89 (0.85, 0.93)   | 0.78 (0.72, 0.84)            |
| nvPPA                           |     |                                             |                     |         |                              |         |                     |                              |
| Symptom duration $\leq 5$ years | 55  | 30.6 (7.1, 96.5)                            | 2.08 (1.86, 2.29)   | <0.001  | 1.63 (1.40, 1.86)            | <0.001  | 0.98 (0.96, 1.00)   | 0.86 (0.80, 0.93)            |
| Symptom duration >5 years       | 17  | 28.4 (13.5, 43.9)                           | 1.96 (1.66, 2.27)   | <0.001  | 1.44 (1.15, 1.72)            | <0.001  | 0.99 (0.98, 1.00)   | 0.90 (0.82, 0.98)            |
| svPPA                           |     |                                             |                     |         |                              |         |                     |                              |
| Symptom duration $\leq 5$ years | 42  | 26.4 (11.6, 60.6)                           | 1.91 (1.70, 2.12)   | <0.001  | 1.51 (1.31, 1.72)            | <0.001  | 0.98 (0.97, 1.00)   | 0.92 (0.86, 0.97)            |
| Symptom duration >5 years       | 42  | 30.2 (6.0, 77.7)                            | 1.96 (1.73, 2.19)   | <0.001  | 1.52 (1.29, 1.74)            | <0.001  | 0.97 (0.93, 1.00)   | 0.87 (0.80, 0.95)            |
| CBS                             |     |                                             |                     |         |                              |         |                     |                              |
| Symptom duration $\leq 5$ years | 63  | 27.3 (5.3, 124.7)                           | 1.91 (1.68, 2.14)   | <0.001  | 1.41 (1.18, 1.64)            | <0.001  | 0.94 (0.89, 0.98)   | 0.85 (0.79, 0.91)            |
| Symptom duration >5 years       | 26  | 28.3 (9.2, 177.6)                           | 1.99 (1.71, 2.28)   | <0.001  | 1.49 (1.20, 1.79)            | <0.001  | 0.97 (0.95, 1.00)   | 0.80 (0.69, 0.91)            |
| PSP-RS                          |     |                                             |                     |         |                              |         |                     |                              |
| Symptom duration $\leq 5$ years | 77  | 26.6 (6.6, 112.0)                           | 1.90 (1.71, 2.09)   | <0.001  | 1.45 (1.24, 1.66)            | <0.001  | 0.97 (0.95, 0.99)   | 0.85 (0.80, 0.90)            |
| Symptom duration >5 years       | 47  | 23.9 (8.8, 59.2)                            | 1.72 (1.51, 1.93)   | <0.001  | 1.24 (0.99, 1.48)            | <0.001  | 0.97 (0.94, 0.99)   | 0.76 (0.68, 0.85)            |
| FTD/ALS                         |     |                                             |                     |         |                              |         |                     |                              |
| Symptom duration $\leq 5$ years | 19  | 42.6 (9.2, 217.9)                           | 2.68 (2.35, 3.00)   | <0.001  | 2.54 (2.24, 2.84)            | <0.001  | 0.98 (0.96, 1.01)   | 0.98 (0.96, 1.01)            |
| Symptom duration >5 years       | 6   | 38.8 (8.9, 54.9)                            | 1.87 (1.34, 2.40)   | <0.001  | 1.54 (1.12, 1.95)            | <0.001  | 0.92 (0.82, 1.03)   | 0.94 (0.87, 1.02)            |
| ALS                             |     |                                             |                     |         |                              |         |                     |                              |
| Symptom duration $\leq 5$ years | 10  | 70.5 (10.0, 121.7)                          | 3.05 (2.62, 3.47)   | <0.001  | 2.82 (2.46, 3.18)            | <0.001  | 0.98 (0.94, 1.02)   | 0.96 (0.88, 1.04)            |
| Symptom duration >5 years       | 2   | 48.0 (45.2, 50.8)                           | 2.72 (1.85, 3.59)   | <0.001  | 2.50 (1.82, 3.19)            | <0.001  | 1.00 (1.00, 1.00)   | 1.00 (1.00, 1.00)            |
| MCI                             |     |                                             |                     |         |                              |         |                     |                              |
| Symptom duration $\leq 5$ years | 45  | 10.9 (2.7, 146.8)                           | 0.78 (0.50, 1.06)   | <0.001  | 0.64 (0.40, 0.89)            | <0.001  | 0.70 (0.59, 0.80)   | 0.66 (0.55, 0.77)            |
| Symptom duration >5 years       | 12  | 13.7 (4.7, 53.3)                            | 1.03 (0.64, 1.42)   | <0.001  | 0.72 (0.39, 1.04)            | <0.001  | 0.81 (0.66, 0.97)   | 0.75 (0.58, 0.93)            |
| Presymptomatic                  | 85  | 8.3 (3.3, 68.2)                             | 0.00 (reference)    | N/A     | 0.00 (reference)             | N/A     | N/A                 | N/A                          |
| bvFTD                           |     |                                             |                     |         |                              |         |                     |                              |
| Symptom duration $\leq 5$ years | 186 | 26.9 (4.7, 246.4)                           | 1.58 (1.32, 1.84)   | <0.001  | 1.43 (1.15, 1.70)            | <0.001  | 0.88 (0.83, 0.92)   | 0.79 (0.73, 0.84)            |
| Symptom duration >5 years       | 103 | 20.4 (4.7, 163.9)                           | 1.23 (0.95, 1.51)   | <0.001  | 0.98 (0.65, 1.31)            | <0.001  | 0.83 (0.77, 0.89)   | 0.66 (0.58, 0.74)            |
| nvPPA                           |     |                                             |                     |         |                              |         |                     |                              |
| Symptom duration $\leq 5$ years | 55  | 30.6 (7.1, 96.5)                            | 1.82 (1.53, 2.11)   | <0.001  | 1.46 (1.10, 1.83)            | <0.001  | 0.94 (0.89, 0.98)   | 0.75 (0.67, 0.84)            |
| Symptom duration >5 years       | 17  | 28.4 (13.5, 43.9)                           | 1.71 (1.28, 2.13)   | <0.001  | 1.30 (0.80, 1.79)            | <0.001  | 0.95 (0.91, 0.99)   | 0.77 (0.65, 0.88)            |
| svPPA                           |     |                                             |                     |         |                              |         |                     |                              |
| Symptom duration $\leq 5$ years | 42  | 26.4 (11.6, 60.6)                           | 1.66 (1.36, 1.95)   | <0.001  | 1.32 (0.98, 1.66)            | <0.001  | 0.94 (0.90, 0.98)   | 0.81 (0.73, 0.89)            |



|         |                           |    |                    |                   |        |                    |        |                   |                   |
|---------|---------------------------|----|--------------------|-------------------|--------|--------------------|--------|-------------------|-------------------|
| CBS     | Symptom duration >5 years | 42 | 30.2 (6.0, 77.7)   | 1.71 (1.39, 2.02) | <0.001 | 1.29 (0.92, 1.66)  | <0.001 | 0.93 (0.88, 0.98) | 0.76 (0.67, 0.85) |
|         | Symptom duration ≤5 years | 63 | 27.3 (5.3, 124.7)  | 1.65 (1.35, 1.96) | <0.001 | 1.15 (0.80, 1.50)  | <0.001 | 0.89 (0.83, 0.95) | 0.74 (0.66, 0.82) |
| PSP-RS  | Symptom duration >5 years | 26 | 28.3 (9.2, 177.6)  | 1.74 (1.35, 2.13) | <0.001 | 1.37 (0.88, 1.86)  | <0.001 | 0.92 (0.87, 0.98) | 0.69 (0.57, 0.81) |
|         | Symptom duration ≤5 years | 77 | 26.6 (6.6, 112.0)  | 1.64 (1.39, 1.90) | <0.001 | 1.23 (0.90, 1.56)  | <0.001 | 0.92 (0.88, 0.97) | 0.73 (0.65, 0.80) |
| FTD/ALS | Symptom duration >5 years | 47 | 23.9 (8.8, 59.2)   | 1.46 (1.18, 1.75) | <0.001 | 1.15 (0.74, 1.55)  | <0.001 | 0.91 (0.86, 0.96) | 0.63 (0.53, 0.73) |
|         | Symptom duration ≤5 years | 19 | 42.6 (9.2, 217.9)  | 2.42 (1.97, 2.87) | <0.001 | 2.32 (1.86, 2.79)  | <0.001 | 0.95 (0.90, 1.00) | 0.93 (0.88, 0.99) |
| ALS     | Symptom duration >5 years | 6  | 38.8 (8.9, 54.9)   | 1.62 (0.88, 2.35) | <0.001 | 1.28 (0.57, 1.99)  | <0.001 | 0.86 (0.70, 1.02) | 0.84 (0.70, 0.98) |
|         | Symptom duration ≤5 years | 10 | 70.5 (10.0, 121.7) | 2.79 (2.21, 3.38) | <0.001 | 2.58 (1.99, 3.17)  | <0.001 | 0.96 (0.89, 1.02) | 0.92 (0.80, 1.04) |
| MCI     | Symptom duration >5 years | 2  | 48.0 (45.2, 50.8)  | 2.47 (1.25, 3.68) | <0.001 | 2.30 (1.12, 3.47)  | <0.001 | 0.98 (0.94, 1.01) | 0.97 (0.92, 1.02) |
|         | Symptom duration ≤5 years | 45 | 10.9 (2.7, 146.8)  | 0.53 (0.16, 0.89) | 0.006  | 0.33 (-0.03, 0.69) | 0.072  | 0.63 (0.52, 0.74) | 0.56 (0.45, 0.67) |
|         | Symptom duration >5 years | 12 | 13.7 (4.7, 53.3)   | 0.78 (0.24, 1.32) | 0.005  | 0.48 (-0.06, 1.03) | 0.082  | 0.74 (0.58, 0.90) | 0.64 (0.46, 0.81) |

β=regression coefficient; CI=confidence interval. β values, 95% CIs, and p values result from linear regression models. β values are interpreted as the difference in the mean NfL concentration (on the base-2 logarithm scale) for the given phenotype group in comparison to controls or to presymptomatic mutation carriers. p values < 0.0031 are considered statistically significant after correcting for the comparisons of NfL between controls and 16 different overall groups. AUC, area under the receiver operating characteristic curve. See also Figures 2A, 2D and S1D.

**Table S5. Comparisons of baseline NfL concentrations between controls, presymptomatic mutation carriers who did not phenoconvert after baseline, and presymptomatic mutation carriers who did phenoconvert, Related to Figures 2B and S1E**

| Mutation Status                | n   | Median (minimum, maximum) NfL concentration (pg/ml) | Unadjusted analysis |                  | Adjusting for age and gender |                  |
|--------------------------------|-----|-----------------------------------------------------|---------------------|------------------|------------------------------|------------------|
|                                |     |                                                     | $\beta$ (95% CI)    | p value          | $\beta$ (95% CI)             | p value          |
| Controls                       | 144 | 7.1 (2.6, 25.4)                                     | 0.00 (reference)    | N/A              | 0.00 (reference)             | N/A              |
| Presymptomatic non-converters  | 43  | 7.0 (3.3, 68.2)                                     | 0.12 (-0.11, 0.35)  | 0.31             | 0.27 (0.08, 0.46)            | <b>0.006</b>     |
| Presymptomatic phenoconverters | 14  | 13.2 (4.7, 65.9)                                    | 0.52 (0.34, 0.71)   | <b>&lt;0.001</b> | 0.56 (0.41, 0.71)            | <b>&lt;0.001</b> |
| Presymptomatic non-converters  | 43  | 7.0 (3.3, 68.2)                                     | 0.00 (reference)    | N/A              | 0.00 (reference)             | N/A              |
| Presymptomatic phenoconverters | 14  | 13.2 (4.7, 65.9)                                    | 0.93 (0.40, 1.45)   | <b>&lt;0.001</b> | 0.88 (0.38, 1.38)            | <b>&lt;0.001</b> |

$\beta$ =regression coefficient; CI=confidence interval.  $\beta$  values, 95% CIs, and p values result from linear regression models.  $\beta$  values are interpreted as the difference in the mean NfL concentration (on the base-2 logarithm scale) for presymptomatic mutation carriers who phenoconverted after baseline to presymptomatic carriers who did not phenoconvert for at least one year from baseline. See also Figures 2B and S1E.

**Table S6: Comparisons of baseline NfL concentration between controls or presymptomatic mutation carriers and phenotype groups for patients with a CDR+NACC-FTLD global score of 0 or 0.5, Related to Figures 2C and 2D**

| Phenotype group | n   | Median (min, max)<br>NfL concentration<br>(pg/ml) | Unadjusted analysis |                | Adjusting for age and gender |                | AUC (95% CI)        |                              |
|-----------------|-----|---------------------------------------------------|---------------------|----------------|------------------------------|----------------|---------------------|------------------------------|
|                 |     |                                                   | $\beta$ (95% CI)    | p value        | $\beta$ (95% CI)             | p value        | Unadjusted analysis | Adjusting for age and gender |
| Controls        | 144 | 7.1 (2.6, 25.4)                                   | 0.00 (reference)    | N/A            | 0.00 (reference)             | N/A            | N/A                 | N/A                          |
| bvFTD           | 19  | 16.1 (4.7, 125.4)                                 | 1.27 (0.94, 1.60)   | < <b>0.001</b> | 1.03 (0.76, 1.30)            | < <b>0.001</b> | 0.87 (0.76, 0.97)   | 0.88 (0.81, 0.95)            |
| nvPPA           | 27  | 29.6 (12.5, 65.2)                                 | 2.09 (1.83, 2.35)   | < <b>0.001</b> | 1.59 (1.34, 1.84)            | < <b>0.001</b> | 0.99 (0.98, 1.00)   | 0.94 (0.91, 0.98)            |
| svPPA           | 11  | 17.6 (12.3, 44.6)                                 | 1.43 (1.05, 1.81)   | < <b>0.001</b> | 1.04 (0.72, 1.36)            | < <b>0.001</b> | 0.97 (0.94, 1.00)   | 0.94 (0.89, 0.98)            |
| CBS             | 26  | 22.8 (5.6, 124.7)                                 | 1.67 (1.38, 1.95)   | < <b>0.001</b> | 1.11 (0.85, 1.36)            | < <b>0.001</b> | 0.93 (0.85, 1.00)   | 0.88 (0.81, 0.96)            |
| PSP-RS          | 23  | 26.0 (6.6, 112.0)                                 | 1.82 (1.53, 2.12)   | < <b>0.001</b> | 1.31 (1.05, 1.58)            | < <b>0.001</b> | 0.95 (0.90, 1.00)   | 0.88 (0.80, 0.97)            |
| Presymptomatic  | 85  | 8.3 (3.3, 68.2)                                   | 0.00 (reference)    | N/A            | 0.00 (reference)             | N/A            | N/A                 | N/A                          |
| bvFTD           | 19  | 16.1 (4.7, 125.4)                                 | 1.02 (0.57, 1.47)   | < <b>0.001</b> | 0.75 (0.30, 1.19)            | <b>0.001</b>   | 0.81 (0.69, 0.92)   | 0.74 (0.63, 0.86)            |
| nvPPA           | 27  | 29.6 (12.5, 65.2)                                 | 1.84 (1.48, 2.19)   | < <b>0.001</b> | 1.45 (1.02, 1.87)            | < <b>0.001</b> | 0.95 (0.91, 0.99)   | 0.83 (0.75, 0.91)            |
| svPPA           | 11  | 17.6 (12.3, 44.6)                                 | 1.17 (0.65, 1.70)   | < <b>0.001</b> | 0.84 (0.29, 1.39)            | <b>0.003</b>   | 0.90 (0.84, 0.97)   | 0.81 (0.71, 0.91)            |
| CBS             | 26  | 22.8 (5.6, 124.7)                                 | 1.41 (1.02, 1.80)   | < <b>0.001</b> | 0.86 (0.43, 1.29)            | < <b>0.001</b> | 0.88 (0.79, 0.96)   | 0.76 (0.66, 0.86)            |
| PSP-RS          | 23  | 26.0 (6.6, 112.0)                                 | 1.57 (1.16, 1.97)   | < <b>0.001</b> | 1.08 (0.63, 1.54)            | < <b>0.001</b> | 0.90 (0.83, 0.97)   | 0.78 (0.67, 0.89)            |

$\beta$ =regression coefficient; CI=confidence interval.  $\beta$  values, 95% CIs, and p values result from linear regression models.  $\beta$  values are interpreted as the difference in the mean NfL concentration (on the base-2 logarithm scale) for the given phenotype group in comparison to controls or presymptomatic mutation carriers. p values < 0.01 are considered as statistically significant after correcting for multiple testing. AUC, area under the receiver operating characteristic curve. See also Figures 2C and 2D.

**Table S7: Comparisons of baseline NfL concentration between symptomatic groups, Related to Figures 2A and S1D**

| Analysis adjusted for age, gender, and symptom duration |     |                                                     |                    |                   |                 |                    |                     |                 |                 |
|---------------------------------------------------------|-----|-----------------------------------------------------|--------------------|-------------------|-----------------|--------------------|---------------------|-----------------|-----------------|
| Phenotype group                                         | n   | Median (minimum, maximum) NfL concentration (pg/ml) | p value vs. nfvPPA | p value vs. svPPA | p value vs. CBS | p value vs. PSP-RS | p value vs. FTD/ALS | p value vs. ALS | p value vs. MCI |
| bvFTD                                                   | 289 | 24.2 (4.7, 246.4)                                   | 0.40               | 0.26              | 0.62            | 0.71               | 0.014               | <0.001          | <0.001          |
| nfvPPA                                                  | 72  | 28.7 (7.1, 96.5)                                    | ----               | 0.93              | 0.55            | 0.079              | 0.063               | <0.001          | <0.001          |
| svPPA                                                   | 84  | 27.6 (6.0, 77.7)                                    | ----               | ----              | 0.70            | 0.13               | 0.030               | <0.001          | <0.001          |
| CBS                                                     | 89  | 28.1 (5.3, 177.6)                                   | ----               | ----              | ----            | 0.25               | 0.022               | <0.001          | <0.001          |
| PSP-RS                                                  | 124 | 25.3 (6.6, 112.0)                                   | ----               | ----              | ----            | ----               | 0.005               | <0.001          | <0.001          |
| FTD/ALS                                                 | 25  | 42.3 (8.9, 217.9)                                   | ----               | ----              | ----            | ----               | ----                | 0.16            | <0.001          |
| ALS                                                     | 12  | 60.8 (10.0, 121.7)                                  | ----               | ----              | ----            | ----               | ----                | ----            | <0.001          |
| MCI                                                     | 57  | 12.9 (2.7, 146.8)                                   | ----               | ----              | ----            | ----               | ----                | ----            | ----            |

p values result from linear regression models that were adjusted for age, gender, and symptom duration. p values < 0.0018 are considered statistically significant after correcting for multiple testing. See also Figures 2A and S1D.

**Table S8: Comparisons of baseline NfL concentrations in clinically normal individuals, bvFTD patients and MCI patients according to mutation status, Related to Figure 2E**

| Phenotype group/Mutation status                       | n   | Median (minimum, maximum) NfL concentration (pg/ml) | Unadjusted analysis  |                  | Adjusting for age, gender, and symptom duration |                  |
|-------------------------------------------------------|-----|-----------------------------------------------------|----------------------|------------------|-------------------------------------------------|------------------|
|                                                       |     |                                                     | $\beta$ (95% CI)     | p value          | $\beta$ (95% CI)                                | p value          |
| Clinically normal                                     |     |                                                     |                      |                  |                                                 |                  |
| No mutation                                           | 144 | 7.1 (2.6, 25.4)                                     | 0.00 (reference)     | N/A              | 0.00 (reference)                                | N/A              |
| <i>C9orf72</i> mutation                               | 35  | 8.0 (3.3, 68.2)                                     | 0.23 (-0.02, 0.48)   | 0.073            | 0.31 (0.10, 0.51)                               | <b>0.004</b>     |
| <i>GRN</i> mutation                                   | 26  | 7.5 (3.3, 65.9)                                     | 0.29 (0.01, 0.58)    | 0.046            | 0.23 (-0.01, 0.47)                              | 0.066            |
| <i>MAPT</i> mutation                                  | 22  | 8.6 (3.6, 23.9)                                     | 0.19 (-0.09, 0.47)   | 0.19             | 0.50 (0.27, 0.74)                               | <b>&lt;0.001</b> |
| bvFTD                                                 |     |                                                     |                      |                  |                                                 |                  |
| No mutation                                           | 188 | 24.1 (5.0, 163.9)                                   | 0.00 (reference)     | N/A              | 0.00 (reference)                                | N/A              |
| <i>C9orf72</i> , <i>GRN</i> , or <i>MAPT</i> mutation | 86  | 24.8 (4.7, 246.4)                                   | 0.01 (-0.27, 0.28)   | 0.96             | 0.07 (-0.20, 0.34)                              | 0.62             |
| <i>C9orf72</i> mutation                               | 43  | 24.8 (5.1, 87.0)                                    | -0.13 (-0.47, 0.22)  | 0.47             | -0.08 (-0.42, 0.25)                             | 0.62             |
| <i>GRN</i> mutation                                   | 15  | 68.9 (27.4, 246.4)                                  | 1.28 (0.74, 1.82)    | <b>&lt;0.001</b> | 1.17 (0.66, 1.69)                               | <b>&lt;0.001</b> |
| <i>MAPT</i> mutation                                  | 28  | 17.7 (4.7, 164.0)                                   | -0.47 (-0.88, -0.06) | 0.024            | -0.34 (-0.77, 0.10)                             | 0.13             |
| MCI                                                   |     |                                                     |                      |                  |                                                 |                  |
| No mutation                                           | 28  | 13.7 (3.9, 146.8)                                   | 0.00 (reference)     | N/A              | 0.00 (reference)                                | N/A              |
| <i>C9orf72</i> , <i>GRN</i> , or <i>MAPT</i> mutation | 28  | 11.9 (2.7, 76.0)                                    | -0.08 (-0.74, 0.58)  | 0.80             | 0.06 (-0.56, 0.69)                              | 0.84             |

$\beta$ =regression coefficient; CI=confidence interval.  $\beta$  values, 95% CIs, and p values result from linear regression models.  $\beta$  values are interpreted as the difference in the mean NfL concentration (on the base-2 logarithm scale) for the given mutation group in comparison to individuals without a mutation. Models involving clinically normal individuals were not adjusted for symptom duration. p values < 0.0083 (six pairwise comparisons for clinically normal individuals; see also Table S9) and <0.0071 (seven pairwise comparisons bvFTD patients; see also Table S9) are considered statistically significant after correcting for multiple testing. See also Figure 2E.

**Table S9: Comparisons of baseline NfL concentration among mutation carriers in presymptomatic individuals and patients with bvFTD, Related to Figure 2E**

| Phenotype group/Mutation status | n  | Median (minimum, maximum) NfL concentration (pg/ml) | Adjusting for age and gender and, for bvFTD only, symptom duration |                                  |
|---------------------------------|----|-----------------------------------------------------|--------------------------------------------------------------------|----------------------------------|
|                                 |    |                                                     | p value vs. <i>GRN</i> mutation                                    | p value vs. <i>MAPT</i> mutation |
| <b>Presymptomatic</b>           |    |                                                     |                                                                    |                                  |
| <i>C9orf72</i> mutation         | 35 | 8.0 (3.3, 68.2)                                     | 0.85                                                               | 0.47                             |
| <i>GRN</i> mutation             | 26 | 7.5 (3.3, 65.9)                                     | ----                                                               | 0.43                             |
| <i>MAPT</i> mutation            | 22 | 8.6 (3.6, 23.9)                                     | ----                                                               | ----                             |
| <b>bvFTD</b>                    |    |                                                     |                                                                    |                                  |
| <i>C9orf72</i> mutation         | 43 | 24.8 (5.1, 87.0)                                    | <b>&lt;0.001</b>                                                   | 0.20                             |
| <i>GRN</i> mutation             | 15 | 68.9 (27.4, 246.4)                                  | ----                                                               | <b>&lt;0.001</b>                 |
| <i>MAPT</i> mutation            | 28 | 17.7 (4.7, 164.0)                                   | ----                                                               | ----                             |

p values result from linear regression models that were adjusted for age, gender and, only for bvFTD patients, symptom duration. p values < 0.0083 (six pairwise comparisons for clinically normal individuals; see also Table S8) and <0.0071 (seven pairwise comparisons bvFTD patients; see also Table S8) are considered statistically significant after correcting for multiple testing. See also Figure 2E.

**Table S10: Disease severity characteristics according to phenotype group, Related to Tables 2 and S11**

| Variable                                | Median (minimum, maximum) or No. (%) of subjects |                    |                   |                 |                     |                     |                 |                 |
|-----------------------------------------|--------------------------------------------------|--------------------|-------------------|-----------------|---------------------|---------------------|-----------------|-----------------|
|                                         | bvFTD<br>(n = 289)                               | nfvPPA<br>(n = 72) | svPPA<br>(n = 84) | CBS<br>(n = 89) | PSP-RS<br>(n = 124) | FTD/ALS<br>(n = 25) | ALS<br>(n = 12) | MCI<br>(n = 57) |
| CDR+NACC-FTLDSb                         | 9 (1, 24)                                        | 4 (1, 24)          | 7 (2, 20)         | 5 (0, 23)       | 7 (0, 21)           | 8 (0, 20)           | 2 (0, 12)       | 2 (0, 4)        |
| <b>CDR+NACC-FTLD Domains</b>            |                                                  |                    |                   |                 |                     |                     |                 |                 |
| <b>Memory</b>                           |                                                  |                    |                   |                 |                     |                     |                 |                 |
| 0                                       | 35 (12.1%)                                       | 34 (47.2%)         | 5 (6.0%)          | 22 (24.7%)      | 29 (23.4%)          | 1 (4.0%)            | 8 (66.7%)       | 21 (36.8%)      |
| 0.5                                     | 86 (29.8%)                                       | 21 (29.2%)         | 33 (39.3%)        | 40 (44.9%)      | 54 (43.5%)          | 12 (48.0%)          | 2 (16.7%)       | 31 (54.4%)      |
| ≥1                                      | 168 (58.1%)                                      | 17 (23.6%)         | 46 (54.8%)        | 27 (30.3%)      | 41 (33.1%)          | 12 (48.0%)          | 2 (16.7%)       | 5 (8.8%)        |
| <b>Orientation</b>                      |                                                  |                    |                   |                 |                     |                     |                 |                 |
| 0                                       | 98 (33.9%)                                       | 52 (72.2%)         | 44 (52.4%)        | 52 (58.4%)      | 58 (46.8%)          | 6 (24.0%)           | 9 (75.0%)       | 43 (75.4%)      |
| 0.5                                     | 70 (24.2%)                                       | 7 (9.7%)           | 18 (21.4%)        | 14 (15.7%)      | 44 (35.5%)          | 10 (40.0%)          | 2 (16.7%)       | 14 (24.6%)      |
| ≥1                                      | 121 (41.9%)                                      | 13 (18.1%)         | 22 (26.2%)        | 23 (25.8%)      | 22 (17.7%)          | 9 (36.0%)           | 1 (8.3%)        | 0 (0.0%)        |
| <b>Judgment and Problem Solving</b>     |                                                  |                    |                   |                 |                     |                     |                 |                 |
| 0                                       | 2 (0.7%)                                         | 21 (29.2%)         | 5 (6.0%)          | 17 (19.1%)      | 12 (9.7%)           | 1 (4.0%)            | 4 (33.3%)       | 18 (31.6%)      |
| 0.5                                     | 32 (11.1%)                                       | 26 (36.1%)         | 14 (16.7%)        | 24 (27.0%)      | 36 (29.0%)          | 4 (16.0%)           | 5 (41.7%)       | 37 (64.9%)      |
| ≥1                                      | 255 (88.2%)                                      | 25 (34.7%)         | 65 (77.4%)        | 48 (53.9%)      | 76 (61.3%)          | 20 (80.0%)          | 3 (25.0%)       | 2 (3.5%)        |
| <b>Community Affairs</b>                |                                                  |                    |                   |                 |                     |                     |                 |                 |
| 0                                       | 13 (4.5%)                                        | 20 (27.8%)         | 6 (7.1%)          | 20 (22.5%)      | 9 (7.3%)            | 2 (8.0%)            | 6 (50.0%)       | 33 (57.9%)      |
| 0.5                                     | 47 (16.3%)                                       | 28 (38.9%)         | 22 (26.2%)        | 24 (27.0%)      | 28 (22.6%)          | 2 (8.0%)            | 2 (16.7%)       | 23 (40.4%)      |
| ≥1                                      | 229 (79.2%)                                      | 24 (33.3%)         | 56 (66.7%)        | 45 (50.6%)      | 87 (70.2%)          | 21 (84.0%)          | 4 (33.3%)       | 1 (1.8%)        |
| <b>Home and Hobbies</b>                 |                                                  |                    |                   |                 |                     |                     |                 |                 |
| 0                                       | 16 (5.5%)                                        | 26 (36.1%)         | 8 (9.5%)          | 16 (18.0%)      | 15 (12.1%)          | 2 (8.0%)            | 7 (58.3%)       | 37 (64.9%)      |
| 0.5                                     | 52 (18.0%)                                       | 23 (31.9%)         | 34 (40.5%)        | 24 (27.0%)      | 24 (19.4%)          | 4 (16.0%)           | 2 (16.7%)       | 20 (35.1%)      |
| ≥1                                      | 221 (76.5%)                                      | 23 (31.9%)         | 42 (50.0%)        | 49 (55.1%)      | 85 (68.5%)          | 19 (76.0%)          | 3 (25.0%)       | 0 (0.0%)        |
| <b>Personal Care</b>                    |                                                  |                    |                   |                 |                     |                     |                 |                 |
| 0                                       | 122 (42.2%)                                      | 62 (86.1%)         | 65 (77.4%)        | 51 (57.3%)      | 61 (49.2%)          | 13 (52.0%)          | 9 (75.0%)       | 57 (100.0%)     |
| 0.5                                     | 0 (0.0%)                                         | 0 (0.0%)           | 0 (0.0%)          | 0 (0.0%)        | 0 (0.0%)            | 0 (0.0%)            | 0 (0.0%)        | 0 (0.0%)        |
| ≥1                                      | 167 (57.8%)                                      | 10 (13.9%)         | 19 (22.6%)        | 38 (42.7%)      | 63 (50.8%)          | 12 (48.0%)          | 3 (25.0%)       | 0 (0.0%)        |
| <b>Behavior/Compartment/Personality</b> |                                                  |                    |                   |                 |                     |                     |                 |                 |
| 0                                       | 0 (0.0%)                                         | 32 (44.4%)         | 11 (13.1%)        | 45 (50.6%)      | 33 (26.6%)          | 2 (8.0%)            | 5 (41.7%)       | 16 (28.1%)      |
| 0.5                                     | 19 (6.6%)                                        | 25 (34.7%)         | 21 (25.0%)        | 18 (20.2%)      | 38 (30.6%)          | 3 (12.0%)           | 5 (41.7%)       | 25 (43.9%)      |
| ≥1                                      | 270 (93.4%)                                      | 15 (20.8%)         | 52 (61.9%)        | 26 (29.2%)      | 53 (42.7%)          | 20 (80.0%)          | 2 (16.7%)       | 16 (28.1%)      |
| <b>Language</b>                         |                                                  |                    |                   |                 |                     |                     |                 |                 |
| 0                                       | 88 (30.4%)                                       | 0 (0.0%)           | 0 (0.0%)          | 23 (25.8%)      | 18 (14.5%)          | 5 (20.0%)           | 5 (41.7%)       | 36 (63.2%)      |
| 0.5                                     | 98 (33.9%)                                       | 7 (9.7%)           | 13 (15.5%)        | 29 (32.6%)      | 50 (40.3%)          | 8 (32.0%)           | 6 (50.0%)       | 19 (33.3%)      |
| ≥1                                      | 103 (35.6%)                                      | 65 (90.3%)         | 71 (84.5%)        | 37 (41.6%)      | 56 (45.2%)          | 12 (48.0%)          | 1 (8.3%)        | 2 (3.5%)        |
| MoCA                                    | 20 (1, 30)                                       | 22 (1, 30)         | 17 (0, 27)        | 23 (1, 30)      | 22 (2, 30)          | 19 (2, 26)          | 23 (10, 29)     | 25 (14, 30)     |
| Unknown                                 | 22                                               | 11                 | 4                 | 18              | 10                  | 1                   | 3               | 0               |
| SNQ                                     | 17 (8, 22)                                       | 18 (8, 22)         | 18 (10, 21)       | 19 (14, 22)     | 19 (12, 22)         | 18.5 (10, 22)       | 19 (14, 22)     | 19 (12, 22)     |

|                     |               |               |              |               |               |               |               |              |
|---------------------|---------------|---------------|--------------|---------------|---------------|---------------|---------------|--------------|
| Unknown             | 53            | 15            | 15           | 13            | 19            | 7             | 0             | 1            |
| MINT                | 27 (0, 32)    | 29 (0, 32)    | 8 (0, 29)    | 30 (17, 32)   | 29 (5, 32)    | 28 (7, 32)    | 29 (16, 32)   | 30 (1, 32)   |
| Unknown             | 38            | 15            | 17           | 14            | 11            | 3             | 0             | 1            |
| NAT                 | 7 (0, 10)     | 8 (0, 10)     | 9 (1, 10)    | 9 (0, 10)     | 9 (0, 10)     | 7.5 (1, 10)   | 9 (5, 10)     | 10 (4, 10)   |
| Unknown             | 74            | 15            | 14           | 30            | 42            | 7             | 2             | 8            |
| Phonemic fluency    | 13 (0, 45)    | 11 (0, 28)    | 15 (0, 37)   | 17 (3, 39)    | 12 (0, 36)    | 13 (0, 36)    | 19 (3, 32)    | 23 (8, 44)   |
| Unknown             | 34            | 18            | 5            | 13            | 9             | 4             | 2             | 1            |
| Category fluency    | 19 (0, 53)    | 19 (0, 46)    | 10 (0, 38)   | 22 (0, 48)    | 17 (0, 40)    | 18 (0, 48)    | 22 (7, 41)    | 33.5 (4, 48) |
| Unknown             | 37            | 16            | 9            | 11            | 6             | 4             | 2             | 1            |
| Digit Span Forward  | 6 (0, 14)     | 5.5 (1, 10)   | 7 (1, 13)    | 7 (0, 14)     | 7 (1, 13)     | 6.5 (3, 12)   | 6 (4, 14)     | 7 (4, 12)    |
| Unknown             | 26            | 14            | 13           | 12            | 11            | 1             | 1             | 0            |
| Digit Span Backward | 4 (0, 12)     | 4 (0, 10)     | 6 (0, 12)    | 4 (0, 11)     | 4 (0, 10)     | 5 (0, 9)      | 5 (3, 9)      | 6 (2, 12)    |
| Unknown             | 32            | 14            | 11           | 13            | 12            | 2             | 1             | 0            |
| Trails B            | 111 (29, 300) | 134 (25, 300) | 96 (37, 300) | 172 (32, 300) | 212 (37, 300) | 194 (53, 300) | 116 (35, 300) | 84 (31, 300) |
| Unknown             | 110           | 22            | 10           | 33            | 42            | 8             | 3             | 1            |

---

CDR+NACC-FTLDb, CDR® Dementia Staging Instrument plus behavior and language domains from the National Alzheimer's Disease Coordinating Center FTLDb module sum of boxes; MoCA, Montreal Cognitive Assessment; SNQ, Social Norms Questionnaire; MINT, Multilingual Naming Test; NAT, Northwestern Anagram Test; Trails B, Trail Making Test Part B. See also Tables 2 and S11.

---



**Table S11: Associations of baseline NfL with disease indicators in symptomatic groups from unadjusted analysis, Related to Tables 2 and S10**

| Phenotype group   | Association between NfL and: |                      |                      |                      |                      |                      |                      |                      |                      |                      |
|-------------------|------------------------------|----------------------|----------------------|----------------------|----------------------|----------------------|----------------------|----------------------|----------------------|----------------------|
|                   | CDR+NACC-FTLDsb              | MoCA                 | SNQ                  | NAT                  | MINT                 | Phonemic fluency     | Category fluency     | Digit span forward   | Digit span backward  | Trails B             |
| <b>FTD groups</b> | n = 658                      | n = 593              | n = 543              | n = 483              | n = 563              | n = 579              | n = 579              | n = 582              | n = 576              | n = 441              |
| $\beta$ (95% CI)  | 0.04 (0.02, 0.05)            | -2.05 (-2.60, -1.50) | -0.76 (-1.02, -0.51) | -0.77 (-1.03, -0.51) | -2.09 (-2.87, -1.30) | -3.90 (-4.63, -3.17) | -3.78 (-4.66, -2.90) | -0.50 (-0.72, -0.28) | -0.82 (-1.03, -0.60) | 21.32 (12.49, 30.15) |
| p value           | <b>&lt;0.001</b>             | <b>&lt;0.001</b>     | <b>&lt;0.001</b>     | <b>&lt;0.001</b>     | <b>&lt;0.001</b>     | <b>&lt;0.001</b>     | <b>&lt;0.001</b>     | <b>&lt;0.001</b>     | <b>&lt;0.001</b>     | <b>&lt;0.001</b>     |
| <b>bvFTD</b>      | n = 289                      | n = 267              | n = 236              | n = 215              | n = 251              | n = 255              | n = 252              | n = 263              | n = 257              | n = 179              |
| $\beta$ (95% CI)  | 0.06 (0.04, 0.09)            | -2.46 (-3.20, -1.72) | -1.13 (-1.49, -0.76) | -0.98 (-1.32, -0.63) | -2.66 (-3.55, -1.77) | -4.73 (-5.73, -3.73) | -5.09 (-6.27, -3.92) | -0.40 (-0.69, -0.11) | -0.93 (-1.25, -0.62) | 15.92 (4.23, 27.61)  |
| p value           | <b>&lt;0.001</b>             | <b>&lt;0.001</b>     | <b>&lt;0.001</b>     | <b>&lt;0.001</b>     | <b>&lt;0.001</b>     | <b>&lt;0.001</b>     | <b>&lt;0.001</b>     | 0.007                | <b>&lt;0.001</b>     | 0.008                |
| <b>nfvPPA</b>     | n = 72                       | n = 61               | n = 57               | n = 57               | n = 57               | n = 54               | n = 56               | n = 58               | n = 58               | n = 50               |
| $\beta$ (95% CI)  | 0.02 (-0.02, 0.06)           | -1.83 (-4.18, 0.52)  | -0.80 (-1.87, 0.26)  | -0.56 (-1.64, 0.52)  | -0.40 (-2.84, 2.03)  | -1.69 (-4.18, 0.81)  | -1.01 (-4.70, 2.68)  | -0.95 (-1.63, -0.27) | -0.48 (-1.28, 0.31)  | 30.90 (-1.76, 63.56) |
| p value           | 0.27                         | 0.13                 | 0.14                 | 0.30                 | 0.74                 | 0.18                 | 0.58                 | 0.007                | 0.23                 | 0.063                |
| <b>svPPA</b>      | n = 84                       | n = 80               | n = 69               | n = 70               | n = 67               | n = 79               | n = 75               | n = 71               | n = 73               | n = 74               |
| $\beta$ (95% CI)  | 0.05 (0.01, 0.10)            | -2.84 (-4.67, -1.00) | -0.76 (-1.72, 0.20)  | -1.34 (-2.18, -0.49) | -4.88 (-7.64, -2.13) | -3.18 (-5.92, -0.44) | -4.68 (-7.32, -2.05) | -0.90 (-1.79, -0.01) | -1.34 (-2.16, -0.53) | 19.75 (-5.65, 45.16) |
| p value           | 0.015                        | <b>0.003</b>         | 0.12                 | <b>0.002</b>         | <b>&lt;0.001</b>     | 0.024                | <b>&lt;0.001</b>     | 0.048                | <b>0.002</b>         | 0.13                 |
| <b>CBS</b>        | n = 89                       | n = 71               | n = 76               | n = 59               | n = 75               | n = 76               | n = 78               | n = 77               | n = 76               | n = 56               |
| $\beta$ (95% CI)  | 0.06 (0.01, 0.10)            | -1.53 (-2.95, -0.10) | 0.00 (-0.46, 0.47)   | -0.62 (-1.27, 0.03)  | -0.34 (-1.10, 0.41)  | -3.17 (-5.13, -1.21) | -0.81 (-3.17, 1.55)  | -0.09 (-0.73, 0.55)  | -0.56 (-1.05, -0.07) | 17.79 (-6.24, 41.81) |
| p value           | 0.012                        | 0.037                | 0.99                 | 0.062                | 0.37                 | <b>0.002</b>         | 0.50                 | 0.79                 | 0.025                | 0.14                 |
| <b>PSP-RS</b>     | n = 124                      | n = 114              | n = 105              | n = 82               | n = 113              | n = 115              | n = 118              | n = 113              | n = 112              | n = 82               |
| $\beta$ (95% CI)  | 0.03 (-0.00, 0.05)           | -1.36 (-2.66, -0.05) | -0.64 (-1.22, -0.05) | -0.21 (-0.93, 0.51)  | -0.99 (-2.23, 0.25)  | -2.57 (-4.43, -0.71) | -2.71 (-4.63, -0.80) | -0.75 (-1.29, -0.20) | -0.70 (-1.17, -0.23) | 38.27 (14.04, 62.51) |
| p value           | 0.094                        | 0.041                | 0.035                | 0.56                 | 0.12                 | 0.007                | 0.006                | 0.008                | <b>0.004</b>         | <b>0.002</b>         |
| <b>MCI</b>        | n = 57                       | n = 57               | n = 56               | n = 49               | n = 56               | n = 56               | n = 56               | n = 57               | n = 57               | n = 56               |
| $\beta$ (95% CI)  | 0.28 (-0.01, 0.57)           | -1.16 (-1.94, -0.38) | -0.26 (-0.77, 0.25)  | -0.28 (-0.69, 0.12)  | -0.79 (-1.85, 0.27)  | -0.66 (-2.43, 1.10)  | -1.32 (-3.38, 0.74)  | -0.01 (-0.47, 0.46)  | -0.14 (-0.65, 0.37)  | 15.16 (1.71, 28.60)  |
| p value           | 0.062                        | 0.005                | 0.32                 | 0.17                 | 0.14                 | 0.45                 | 0.20                 | 0.98                 | 0.58                 | 0.028                |

$\beta$ =regression coefficient; CI=confidence interval.  $\beta$  values, 95% CIs, and p values result from unadjusted linear regression models.  $\beta$  values are interpreted as the change in the mean value of the given disease indicator for each doubling of NfL concentration. p values < 0.005 are considered statistically significant after correcting for multiple testing are shown in bold. Nominally significant p values <0.05 are shown in italic. The FTD group includes patients with bvFTD, nfvPPA, svPPA, CBS or PSP-RS. CDR+NACC-FTLDsb, CDR® Dementia Staging Instrument plus behavior and language domains from the National Alzheimer’s Disease Coordinating Center FTLD module sum of boxes; MoCA, Montreal Cognitive Assessment; SNQ, Social Norms Questionnaire; MINT, Multilingual Naming Test; NAT, Northwestern Anagram Test; Trails B, Trail Making Test Part B. See also Tables 2 and S10.

**Table S12: Associations between baseline NFL concentrations and rates of change over time of disease indicators, Related to Table 2**

| Association between baseline NFL and rate of change over time in the given disease indicator |                     |                      |         |                                                                     |         |                                                                  |                      |         |                                                                     |         |
|----------------------------------------------------------------------------------------------|---------------------|----------------------|---------|---------------------------------------------------------------------|---------|------------------------------------------------------------------|----------------------|---------|---------------------------------------------------------------------|---------|
| bvFTD patients                                                                               |                     |                      |         |                                                                     |         | Combined group of bvFTD, nfvPPA, svPPA, CBS, and PSP-RS patients |                      |         |                                                                     |         |
| Disease indicator                                                                            | Unadjusted analysis |                      |         | Adjusting for age, gender, symptom duration, and years of education |         | Unadjusted analysis                                              |                      |         | Adjusting for age, gender, symptom duration, and years of education |         |
|                                                                                              | n                   | $\beta$ (95% CI)     | p value | $\beta$ (95% CI)                                                    | p value | n                                                                | $\beta$ (95% CI)     | p value | $\beta$ (95% CI)                                                    | p value |
| CDR+NACC-FTLDSb                                                                              | 52                  | 1.33 (0.76, 1.90)    | <0.001  | 1.16 (0.48, 1.85)                                                   | 0.001   | 90                                                               | 1.07 (0.59, 1.56)    | <0.001  | 1.12 (0.56, 1.68)                                                   | <0.001  |
| MoCA                                                                                         | 40                  | -2.05 (-2.94, -1.17) | <0.001  | -2.03 (-3.02, -1.03)                                                | <0.001  | 69                                                               | -1.85 (-2.60, -1.10) | <0.001  | -2.01 (-2.84, -1.18)                                                | <0.001  |
| SNQ                                                                                          | 33                  | -0.10 (-0.74, 0.54)  | 0.75    | 0.29 (-0.43, 1.02)                                                  | 0.42    | 52                                                               | -0.52 (-1.24, 0.19)  | 0.15    | 0.00 (-0.77, 0.78)                                                  | 1.00    |
| NAT                                                                                          | 29                  | -0.61 (-1.48, 0.27)  | 0.16    | -0.97 (-2.12, 0.18)                                                 | 0.093   | 44                                                               | -0.70 (-1.33, -0.06) | 0.032   | -0.67 (-1.49, 0.15)                                                 | 0.11    |
| MINT                                                                                         | 38                  | -1.37 (-2.40, -0.35) | 0.010   | -1.30 (-2.47, -0.13)                                                | 0.030   | 71                                                               | -0.90 (-1.62, -0.19) | 0.013   | -0.97 (-1.78, -0.17)                                                | 0.019   |
| Phonemic fluency                                                                             | 38                  | -1.69 (-2.85, -0.52) | 0.006   | -0.88 (-2.20, 0.44)                                                 | 0.19    | 71                                                               | -1.45 (-2.34, -0.57) | 0.002   | -1.47 (-2.50, -0.43)                                                | 0.006   |
| Category fluency                                                                             | 39                  | -3.95 (-5.21, -2.69) | <0.001  | -3.38 (-4.83, -1.93)                                                | <0.001  | 72                                                               | -3.28 (-4.32, -2.23) | <0.001  | -3.06 (-4.23, -1.89)                                                | <0.001  |
| Digit span forward                                                                           | 39                  | -0.24 (-0.75, 0.27)  | 0.35    | -0.03 (-0.65, 0.58)                                                 | 0.91    | 72                                                               | -0.21 (-0.61, 0.18)  | 0.28    | -0.08 (-0.51, 0.36)                                                 | 0.73    |
| Digit span backward                                                                          | 39                  | -0.63 (-1.16, -0.09) | 0.024   | -0.51 (-1.15, 0.13)                                                 | 0.11    | 73                                                               | -0.35 (-0.76, 0.07)  | 0.10    | -0.46 (-0.93, 0.01)                                                 | 0.057   |
| Trails B                                                                                     | 25                  | 27.26 (6.64, 47.88)  | 0.012   | 33.59 (6.35, 60.83)                                                 | 0.018   | 51                                                               | 9.22 (-5.93, 24.37)  | 0.23    | 13.52 (-68.91, 190.90)                                              | 0.13    |

$\beta$ =regression coefficient; CI=confidence interval.  $\beta$  values, 95% CIs, and p values result from linear regression models.  $\beta$  values are interpreted as the change in the mean rate of change per year in the given outcome for each doubling of NFL concentration. p values < 0.005 are considered statistically significant after correcting for multiple testing. The FTD group includes patients with bvFTD, nfvPPA, svPPA, CBS or PSP-RS. CDR+NACC-FTLDSb, CDR® Dementia Staging Instrument plus behavior and language domains from the National Alzheimer's Disease Coordinating Center FTL D module sum of boxes; MoCA, Montreal Cognitive Assessment; SNQ, Social Norms Questionnaire; MINT, Multilingual Naming Test; NAT, Northwestern Anagram Test; Trails B, Trail Making Test Part B. See also Table 2.

**Table S13: Comparison of rate of change in NfL concentrations with controls for presymptomatic mutation carriers and patients with MCI, bvFTD, PPA or parkinsonian disorders, Related to Figures 3 and 4**

| Mutation Status                                     | n  | Median (minimum, maximum) rate of change per year in NfL concentration (pg/ml) | Unadjusted analysis |                  | Adjusting for age and gender |                  |
|-----------------------------------------------------|----|--------------------------------------------------------------------------------|---------------------|------------------|------------------------------|------------------|
|                                                     |    |                                                                                | $\beta$ (95% CI)    | p value          | $\beta$ (95% CI)             | p value          |
| Controls                                            | 69 | 0.3 (-6.4, 4.9)                                                                | 0.00 (reference)    | N/A              | 0.00 (reference)             | N/A              |
| All pre-symptomatic mutation carriers               | 52 | 0.6 (-10.1, 24.9)                                                              | 1.12 (-0.01, 2.24)  | 0.052            | 1.30 (0.13, 2.48)            | 0.029            |
| <i>C9orf72</i> mutation                             | 17 | 0.6 (-10.1, 11.3)                                                              | -0.11 (-1.29, 1.07) | 0.86             | 0.33 (-0.94, 1.59)           | 0.61             |
| <i>GRN</i> mutation                                 | 14 | 0.7 (-1.0, 7.7)                                                                | 1.63 (0.63, 2.62)   | <b>0.002</b>     | 1.35 (0.31, 2.38)            | 0.012            |
| <i>MAPT</i> mutation                                | 20 | 0.5 (-2.3, 4.9)                                                                | 0.63 (-0.12, 1.37)  | 0.097            | 0.69 (-0.11, 1.49)           | 0.092            |
| Non-converters                                      | 35 | 0.5 (-3.7, 11.3)                                                               | 0.33 (-0.39, 1.05)  | 0.36             | 0.42 (-0.34, 1.18)           | 0.28             |
| Phenoconverters                                     | 14 | 2.2 (-1.0, 24.9)                                                               | 1.88 (1.02, 2.73)   | <b>&lt;0.001</b> | 1.91 (1.04, 2.78)            | <b>&lt;0.001</b> |
| MCI                                                 | 18 | 1.9 (-0.9, 54.6)                                                               | 9.32 (5.44, 13.21)  | <b>&lt;0.001</b> | 8.87 (5.04, 12.71)           | <b>&lt;0.001</b> |
| bvFTD                                               | 35 | 2.8 (-3.8, 48.9)                                                               | 4.82 (2.49, 7.15)   | <b>&lt;0.001</b> | 5.50 (3.16, 7.84)            | <b>&lt;0.001</b> |
| No mutation                                         | 4  | 2.6 (1.1, 6.8)                                                                 | N/A                 | N/A              | N/A                          | N/A              |
| <i>C9orf72</i> , <i>GRN</i> or <i>MAPT</i> mutation | 31 | 3.0 (-3.8, 48.9)                                                               | 5.06 (2.59, 7.52)   | <b>&lt;0.001</b> | 5.87 (3.39, 8.35)            | <b>&lt;0.001</b> |
| <i>C9orf72</i> mutation                             | 13 | 1.2 (-3.8, 12.0)                                                               | 1.75 (0.46, 3.03)   | 0.008            | 1.79 (0.43, 3.15)            | 0.011            |
| <i>GRN</i> mutation                                 | 4  | 15.9 (3.2, 25.8)                                                               | N/A                 | N/A              | N/A                          | N/A              |
| <i>MAPT</i> mutation                                | 14 | 2.2 (-0.5, 48.9)                                                               | 5.32 (2.28, 8.37)   | <b>&lt;0.001</b> | 5.40 (2.38, 8.42)            | <b>&lt;0.001</b> |
| nfvPPA and svPPA                                    | 9  | 3.5 (1.0, 42.3)                                                                | 13.64 (9.92, 17.36) | <b>&lt;0.001</b> | 12.43 (8.31, 16.55)          | <b>&lt;0.001</b> |
| CBS and PSP-RS                                      | 9  | 0.4 (-16.0, 18.4)                                                              | 2.27 (-0.22, 4.77)  | 0.074            | 2.14 (-0.57, 4.86)           | 0.12             |

$\beta$ =regression coefficient; CI=confidence interval.  $\beta$  values, 95% CIs, and p values result from linear regression models.  $\beta$  values are interpreted as the difference in the mean rate of change per year in NfL concentration for the given group in comparison to controls. p values < 0.0039 are considered statistically significant after correcting for multiple testing. Rates of NfL change per year were calculated only for individuals with one or more NfL measurements at least one year from baseline. There was one presymptomatic mutation carrier with a mutation in *C9orf72* and in *GRN* for whom NfL rate of change could be calculated; this individual was only included in the “All pre-symptomatic mutation carriers” group. See also Figures 3 and 4.

**Table S14: Comparisons of rate of change in NfL concentrations between presymptomatic mutation carriers and other phenotype groups, Related to Figure 3**

| Analysis adjusted for age and gender (and symptom duration when relevant) |    |                                                                                |                             |                 |                   |                              |                            |
|---------------------------------------------------------------------------|----|--------------------------------------------------------------------------------|-----------------------------|-----------------|-------------------|------------------------------|----------------------------|
| Phenotype group                                                           | n  | Median (minimum, maximum) rate of change per year in NfL concentration (pg/ml) | p value vs. phenoconverters | p value vs. MCI | p value vs. bvFTD | p value vs. nfvPPA and svPPA | p value vs. CBS and PSP-RS |
| Presymptomatic non-converters                                             | 35 | 0.5 (-3.7, 11.3)                                                               | 0.008                       | 0.032           | <b>0.001</b>      | <b>0.003</b>                 | 0.38                       |
| Presymptomatic phenoconverters                                            | 14 | 2.2 (-1.0, 24.9)                                                               | ----                        | 0.40            | 0.40              | 0.23                         | 0.85                       |
| MCI                                                                       | 18 | 1.9 (-0.9, 54.6)                                                               | ----                        | ----            | 0.26              | 0.64                         | 0.11                       |
| bvFTD                                                                     | 35 | 2.8 (-3.8, 48.9)                                                               | ----                        | ----            | ----              | 0.025                        | 0.66                       |
| nfvPPA and svPPA                                                          | 9  | 3.5 (1.0, 42.3)                                                                | ----                        | ----            | ----              | ----                         | 0.032                      |
| CBS and PSP-RS                                                            | 9  | 0.4 (-16.0, 18.4)                                                              | ----                        | ----            | ----              | ----                         | ----                       |

p values result from linear regression models that were adjusted for age, gender, and symptom duration. p values < 0.0033 are considered statistically significant after correcting for multiple testing. Presymptomatic non-converters refers to presymptomatic mutation carriers who did not phenoconvert for at least one year from baseline. Presymptomatic phenoconverters refers to presymptomatic mutation carriers who phenoconverted after baseline. Rates of NfL change per year were calculated only for individuals with one or more NfL measurements at least one year from baseline. See also Figure 3.

**Table S15: Comparisons of rate of change in NfL concentration among pre-symptomatic individuals according to mutation status, Related to Figure 4**

|                         |    | Adjusting for age and gender                                                   |                                 |                                  |
|-------------------------|----|--------------------------------------------------------------------------------|---------------------------------|----------------------------------|
| Phenotype group         | n  | Median (minimum, maximum) rate of change per year in NfL concentration (pg/ml) | p value vs. <i>GRN</i> mutation | p value vs. <i>MAPT</i> mutation |
| <i>C9orf72</i> mutation | 17 | 0.6 (-10.1, 11.3)                                                              | 0.66                            | 0.55                             |
| <i>GRN</i> mutation     | 14 | 0.7 (-1.0, 7.7)                                                                | ----                            | 0.63                             |
| <i>MAPT</i> mutation    | 20 | 0.5 (-2.3, 4.9)                                                                | ----                            | ----                             |

p values result from linear regression models that were adjusted for age and gender. p values < 0.0167 are considered statistically significant after correcting for multiple testing. Rates of NfL change per year were calculated only for individuals with one or more NfL measurements at least one year from baseline. See also Figure 4.
