# Supplementary material for: Comprehensive cross-sectional and longitudinal analyses of plasma neurofilament light across FTD spectrum disorders
Source: PubMed Central journal article supplement — Cell Rep Med. 2022 Apr 19;3(4):100607. doi: 10.1016/j.xcrm.2022.100607 (PMC9044101; doi:10.1016/j.xcrm.2022.100607), 2022-04-19
Supplement: mmc2.pdf [file mmc2.pdf]

# Comprehensive cross-sectional and longitudinal analyses of plasma neurofilament light across FTD spectrum disorders

## Graphical abstract

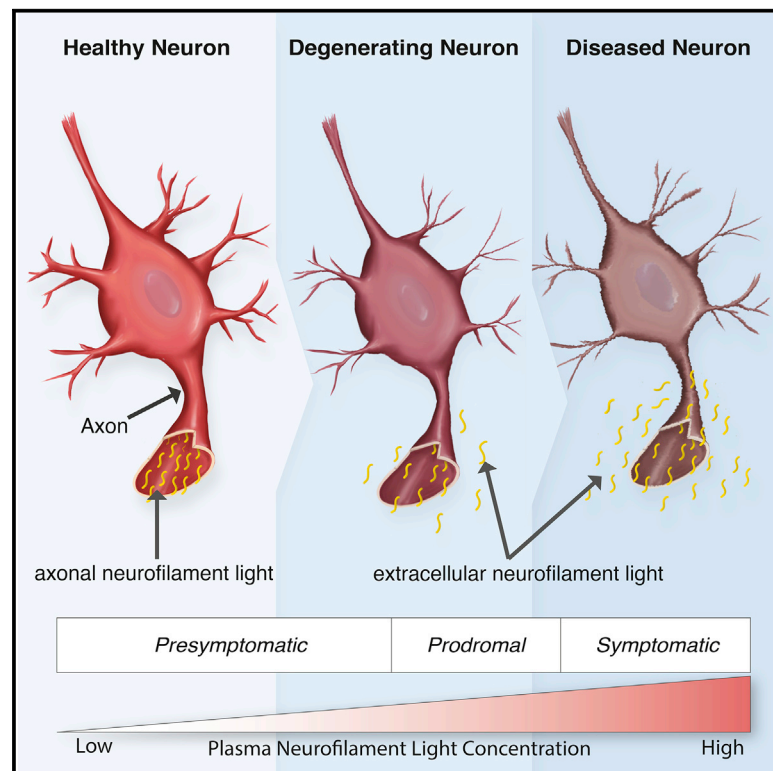

## Authors

Tania F. Gendron, Michael G. Heckman, Launia J. White, ..., Adam L. Boxer, ALLFTD consortium, Leonard Petrucelli

## Correspondence

Gendron.Tania@mayo.edu (T.F.G.), Petrucelli.Leonard@mayo.edu (L.P.)

## In brief

Gendron et al. show that plasma neurofilament light (NfL) increases before symptom onset in individuals with a genetic risk of frontotemporal dementia (FTD) and associates with clinical indicators of disease severity. Plasma NfL thus holds promise as a susceptibility and prognostic biomarker that can improve patient care and FTD treatment development.

## Highlights

- Plasma NfL levels increase prior to frontotemporal dementia (FTD) symptom onset
- Plasma NfL can facilitate an earlier FTD diagnosis
- Plasma NfL levels associate with clinical indicators of FTD disease severity
- Plasma NfL shows promise as a susceptibility and prognostic biomarker for FTD

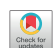

## Article

# Comprehensive cross-sectional and longitudinal analyses of plasma neurofilament light across FTD spectrum disorders

Tania F. Gendron,<sup>1,2,27,\*</sup> Michael G. Heckman,<sup>3</sup> Launia J. White,<sup>3</sup> Austin M. Veire,<sup>1</sup> Otto Pedraza,<sup>4</sup> Alexander R. Burch,<sup>5</sup> Andrea C. Bozoki,<sup>6</sup> Bradford C. Dickerson,<sup>7</sup> Kimiko Domoto-Reilly,<sup>8</sup> Tatiana Foroud,<sup>9</sup> Leah K. Forsberg,<sup>10</sup> Douglas R. Galasko,<sup>11</sup> Nupur Ghoshal,<sup>12,13</sup> Neill R. Graff-Radford,<sup>5</sup> Murray Grossman,<sup>14</sup> Hilary W. Heuer,<sup>15</sup> Edward D. Huey,<sup>16,17</sup> Ging-Yuek R. Hsiung,<sup>18</sup> David J. Irwin,<sup>19</sup> Daniel I. Kaufer,<sup>6</sup> Gabriel C. Leger,<sup>11</sup> Irene Litvan,<sup>11</sup>

(Author list continued on next page)

<sup>1</sup>Department of Neuroscience, Mayo Clinic, Jacksonville, FL 32224, USA

<sup>2</sup>Mayo Clinic Graduate School of Biomedical Sciences, Mayo Clinic, Jacksonville, FL 32224, USA

<sup>3</sup>Division of Clinical Trials and Biostatistics, Mayo Clinic, Jacksonville, FL 32224, USA

<sup>4</sup>Department of Psychiatry & Psychology, Mayo Clinic, Jacksonville, FL 32224, USA

<sup>5</sup>Department of Neurology, Mayo Clinic, Jacksonville, FL 32224, USA

<sup>6</sup>Department of Neurology, University of North Carolina at Chapel Hill, Chapel Hill, NC 27599, USA

<sup>7</sup>Department of Neurology, Massachusetts General Hospital, Harvard Medical School, Boston, MA 02114, USA

<sup>8</sup>Department of Neurology, University of Washington, Seattle, WA 98104, USA

<sup>9</sup>Department of Medical and Molecular Genetics, Indiana University School of Medicine, Indianapolis, IN 46202, USA

<sup>10</sup>Department of Neurology, Mayo Clinic, Rochester, MN 55905, USA

<sup>11</sup>Parkinson and Other Movement Disorder Center, Department of Neuroscience, University of California, San Diego, La Jolla, CA 92037, USA

<sup>12</sup>Department of Neurology, Washington University School of Medicine, St. Louis, MO 63110, USA

<sup>13</sup>Department of Psychiatry, Washington University School of Medicine, St. Louis, MO 63110, USA

<sup>14</sup>Department of Neurology, University of Pennsylvania, Philadelphia, PA 19104, USA

<sup>15</sup>Memory and Aging Center, Department of Neurology, Weill Institute for Neurosciences, University of California, San Francisco, San Francisco, CA 94158, USA

<sup>16</sup>Department of Psychiatry, Taub Institute, Columbia University, New York, NY 10032, USA

<sup>17</sup>Department of Neurology, Taub Institute, Columbia University, New York, NY 10032, USA

<sup>18</sup>Centre for Brain Health, Department of Medicine, University of British Columbia, Vancouver, BC V6T 1Z3, Canada

<sup>19</sup>Department of Neurology, University of Pennsylvania Perelman School of Medicine, Philadelphia, PA 19104, USA

<sup>20</sup>Nantz National Alzheimer Center, Stanley H. Appel Department of Neurology, Houston Methodist Research Institute, Weill Cornell Medicine, Houston, TX 77030, USA

<sup>21</sup>Department of Neurology, University of California at Los Angeles, Los Angeles, CA 90095, USA

(Affiliations continued on next page)

## SUMMARY

Frontotemporal dementia (FTD) therapy development is hamstrung by a lack of susceptibility, diagnostic, and prognostic biomarkers. Blood neurofilament light (NfL) shows promise as a biomarker, but studies have largely focused only on core FTD syndromes, often grouping patients with different diagnoses. To expedite the clinical translation of NfL, we avail ARTFL LEFFTDS Longitudinal Frontotemporal Lobar Degeneration (ALLFTD) study resources and conduct a comprehensive investigation of plasma NfL across FTD syndromes and in presymptomatic FTD mutation carriers. We find plasma NfL is elevated in all studied syndromes, including mild cases; increases in presymptomatic mutation carriers prior to phenoconversion; and associates with indicators of disease severity. By facilitating the identification of individuals at risk of phenoconversion, and the early diagnosis of FTD, plasma NfL can aid in participant selection for prevention or early treatment trials. Moreover, its prognostic utility would improve patient care, clinical trial efficiency, and treatment outcome estimations.

## INTRODUCTION

Frontotemporal dementia (FTD) is a term for disorders marked by behavior, language, executive function, and/or motor impairments. Approximately 30% of FTD cases are genetic; mutations

in chromosome 9 open reading frame 72 (*C9orf72*), progranulin (*GRN*), or microtubule-associated protein tau (*MAPT*) most often being the cause.<sup>1</sup> While FTD syndromes can have overlapping symptoms,<sup>2</sup> the dominant presenting feature in patients with behavioral variant FTD (bvFTD), the most common FTD

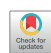

Joseph C. Masdeu,<sup>20</sup> Mario F. Mendez,<sup>21,22</sup> Chiadi U. Onyike,<sup>23</sup> Belen Pascual,<sup>20</sup> Aaron Ritter,<sup>24</sup> Erik D. Roberson,<sup>25</sup> Julio C. Rojas,<sup>15</sup> Maria Carmela Tartaglia,<sup>26</sup> Zbigniew K. Wszolek,<sup>5</sup> Howard Rosen,<sup>15</sup> Bradley F. Boeve,<sup>10</sup> Adam L. Boxer,<sup>15</sup> ALLFTD consortium, Leonard Petrucelli<sup>1,2,\*</sup>

<sup>22</sup>Department of Psychiatry and Biobehavioral Sciences, University of California at Los Angeles, Los Angeles, CA 90095, USA

<sup>23</sup>Department of Psychiatry and Behavioral Sciences, Johns Hopkins University, Baltimore, MD 21287, USA

<sup>24</sup>Neurological Institute, Cleveland Clinic Lou Ruvo Center for Brain Health, Las Vegas, NV 89106, USA

<sup>25</sup>Center for Neurodegeneration and Experimental Therapeutics, Alzheimer's Disease Center, Department of Neurology, University of Alabama at Birmingham, Birmingham, AL 35294, USA

<sup>26</sup>Krembil Brain Institute, Tanz Centre for Research in Neurodegenerative Diseases, Division of Neurology, Department of Medicine, University of Toronto, Toronto, ON M5S 1A8, Canada

<sup>27</sup>Lead contact

\*Correspondence: [Gendron.Tania@mayo.edu](mailto:Gendron.Tania@mayo.edu) (T.F.G.), [Petrucelli.Leonard@mayo.edu](mailto:Petrucelli.Leonard@mayo.edu) (L.P.)

<https://doi.org/10.1016/j.xcrm.2022.100607>

syndrome, is a change in personality or behavior associated with executive dysfunction. Individuals with nonfluent and agrammatic variant primary progressive aphasia (nfvPPA) experience nonfluent speech output, agrammatism, and telegraphic speech, while those with semantic variant PPA (svPPA) develop word loss and object knowledge and comprehension deficits. The FTD spectrum also includes bvFTD plus amyotrophic lateral sclerosis (FTD-ALS) and the parkinsonian disorders corticobasal syndrome (CBS) and progressive supranuclear palsy-Richardson syndrome (PSP-RS).

Because of substantial clinical heterogeneity within and among FTD syndromes, establishing methods to predict prognosis is an important endeavor. Prognostic biomarkers improve drug development by ensuring balanced patient groups (e.g., equal proportions of slow and fast progressors) in clinical trial treatment arms and by providing a means to estimate therapeutic benefit. Studies that investigated cerebrospinal fluid (CSF) neurofilament light (NfL), a measure of neuroaxonal damage, as a biomarker of FTD severity or progression found that higher CSF NfL generally predicts worse brain atrophy and neuropsychological performance as well as shorter survival.<sup>3–11</sup> Yet a blood biomarker is more practical and economical, especially when monitoring biomarkers longitudinally. Most of the largely cross-sectional studies examining the prognostic power of blood NfL for FTD focused on bvFTD, nfvPPA, and svPPA,<sup>5,12–20</sup> with studies on CBS and PSP-RS being rare.<sup>21–23</sup> In only some analyses did blood NfL correlate with indicators of disease severity. The discrepant findings among studies may result from small cohort sizes and clinical variability among FTD syndromes. Indeed, several studies grouped patients with different syndromes together to increase statistical power, but doing so may mask associations of interest or incorrectly ascribe findings to a particular diagnostic group. There is thus a need for more rigorous investigations on the prognostic utility of blood NfL for FTD syndromes if this biomarker is to become clinically useful.

Blood NfL may also improve patient care and treatment development by aiding in the earlier diagnosis of FTD and monitoring presymptomatic disease progression in individuals with FTD-causing gene mutations. Therapies are expected to be most effective when initiated early in the disease course and, until there is a biomarker to forecast phenoconversion, recruiting presymptomatic mutation carriers to prevention or early treatment trials will remain challenging. Fortunately, findings suggest that blood NfL increases as presymptomatic FTD mutation carriers approach prodromal and disease stages.<sup>20,24–26</sup> However,

because the number of phenoconverters in each study was small, additional investigations are crucial if we are to establish whether NfL represents a viable phenoconversion biomarker.

Toward expediting the translation of plasma NfL to the clinic and creating a major informational database for FTD investigators and the scientific community, we undertook a comprehensive cross-sectional and longitudinal study to evaluate the staging and prognostic utility of plasma NfL across FTD syndromes. To do so, we availed the resources of the ARTFL LEFFTDS Longitudinal Frontotemporal Lobar Degeneration (ALLFTD) (<http://www.allftd.org>) study, which allowed us to measure plasma NfL in the largest series of well-characterized presymptomatic FTD mutation carriers and patients with bvFTD, nfvPPA, svPPA, CBS, or PSP-RS.

## RESULTS

### Patient characteristics

We measured baseline plasma NfL in clinically normal, mutation-negative individuals in kindreds with an FTD-causing mutation (controls;  $n = 144$ ), presymptomatic individuals with a *C9orf72* repeat expansion or a *GRN* or *MAPT* mutation ( $n = 85$ ), and patients with sporadic or genetic bvFTD ( $n = 289$ ), nfvPPA ( $n = 72$ ), svPPA ( $n = 84$ ), CBS ( $n = 89$ ), or PSP-RS ( $n = 124$ ). Patients with FTD-ALS ( $n = 25$ ), ALS ( $n = 12$ ), and mild cognitive or behavioral changes (mild cognitive impairment [MCI]) ( $n = 57$ ) were included for comparison in some analyses. Demographic and clinical data are presented in [Table 1](#). [Table S1](#) indicates the number of presymptomatic phenoconverters, non-converters, and individuals in other phenotype groups with baseline and longitudinal NfL measures and for whom rates of change in NfL could be determined.

Associations of baseline plasma NfL concentrations with age, gender, and symptom duration (time from symptom onset to plasma collection) are shown in [Figures 1](#) and [S1A–S1C](#) and [Table S2](#). After correction was made for multiple testing, increased NfL was associated with older age in controls, presymptomatic mutation carriers, and patients with bvFTD, CBS, or MCI ( $p \leq 0.013$ ) and with shorter symptom duration in patients with bvFTD ( $p = 0.002$ ). NfL was higher in females than in males for controls and bvFTD patients ( $p \leq 0.001$ ). Because of these associations, we discuss below data from analyses adjusted for age and gender and, when relevant, also for symptom duration and education. Data from unadjusted analyses are provided in [Tables S3–S6](#), [S8](#), and [S11–S13](#).

**Table 1. Subject characteristics according to phenotype groups**

| Variable                                                                                                                                                                                                                                                                                                                                                                                                                                                                                                                                                                                                | Median (minimum, maximum) or no. (%) of subjects |                                                 |                    |                   |                   |                 |                     |                 |                     |                 |
|---------------------------------------------------------------------------------------------------------------------------------------------------------------------------------------------------------------------------------------------------------------------------------------------------------------------------------------------------------------------------------------------------------------------------------------------------------------------------------------------------------------------------------------------------------------------------------------------------------|--------------------------------------------------|-------------------------------------------------|--------------------|-------------------|-------------------|-----------------|---------------------|-----------------|---------------------|-----------------|
|                                                                                                                                                                                                                                                                                                                                                                                                                                                                                                                                                                                                         | Controls<br>(n = 144)                            | Presymptomatic<br>mutation carriers<br>(n = 85) | bvFTD<br>(n = 289) | nvPPA<br>(n = 72) | svPPA<br>(n = 84) | CBS<br>(n = 89) | PSP-RS<br>(n = 124) | MCI<br>(n = 57) | FTD-ALS<br>(n = 25) | ALS<br>(n = 12) |
| Age at baseline (years)                                                                                                                                                                                                                                                                                                                                                                                                                                                                                                                                                                                 | 53 (40, 80)                                      | 49 (40, 71)                                     | 62 (32, 85)        | 70 (49, 86)       | 66 (50, 88)       | 68 (40, 87)     | 69 (48, 82)         | 60 (27, 82)     | 61 (45, 75)         | 61 (48, 70)     |
| Gender (male)                                                                                                                                                                                                                                                                                                                                                                                                                                                                                                                                                                                           | 49 (34.0%)                                       | 41 (48.2%)                                      | 170 (58.8%)        | 33 (45.8%)        | 43 (51.2%)        | 46 (51.7%)      | 63 (50.8%)          | 29 (50.9%)      | 14 (56.0%)          | 8 (66.7%)       |
| Age at symptom onset (years)                                                                                                                                                                                                                                                                                                                                                                                                                                                                                                                                                                            | NA                                               | NA                                              | 57 (26, 80)        | 64 (44, 81)       | 60 (17, 81)       | 64 (32, 82)     | 64 (47, 79)         | 53 (20, 78)     | 60 (35, 69)         | 59 (48, 69)     |
| Symptom duration at baseline (years)                                                                                                                                                                                                                                                                                                                                                                                                                                                                                                                                                                    | NA                                               | NA                                              | 5 (0, 32)          | 4 (1, 12)         | 6 (1, 34)         | 4 (0, 32)       | 5 (1, 20)           | 3 (0, 54)       | 3 (1, 15)           | 2 (0, 10)       |
| <b>Mutation status</b>                                                                                                                                                                                                                                                                                                                                                                                                                                                                                                                                                                                  |                                                  |                                                 |                    |                   |                   |                 |                     |                 |                     |                 |
| None                                                                                                                                                                                                                                                                                                                                                                                                                                                                                                                                                                                                    | 144 (100.0%)                                     | 0 (0.0%)                                        | 188 (67.6%)        | 62 (89.9%)        | 78 (94.0%)        | 75 (89.3%)      | 115 (98.3%)         | 28 (50.0%)      | 17 (68.0%)          | 4 (33.3%)       |
| <i>C9orf72</i>                                                                                                                                                                                                                                                                                                                                                                                                                                                                                                                                                                                          | 0 (0.0%)                                         | 35 (41.2%)                                      | 43 (15.5%)         | 1 (1.4%)          | 2 (2.4%)          | 2 (2.4%)        | 1 (0.9%)            | 15 (26.8%)      | 8 (32.0%)           | 8 (66.7%)       |
| <i>GRN</i>                                                                                                                                                                                                                                                                                                                                                                                                                                                                                                                                                                                              | 0 (0.0%)                                         | 26 (30.6%)                                      | 15 (5.4%)          | 6 (8.7%)          | 1 (1.2%)          | 5 (6.0%)        | 0 (0.0%)            | 7 (12.5%)       | 0 (0.0%)            | 0 (0.0%)        |
| <i>MAPT</i>                                                                                                                                                                                                                                                                                                                                                                                                                                                                                                                                                                                             | 0 (0.0%)                                         | 22 (25.9%)                                      | 28 (10.1%)         | 0 (0.0%)          | 0 (0.0%)          | 1 (1.2%)        | 1 (0.9%)            | 6 (10.7%)       | 0 (0.0%)            | 0 (0.0%)        |
| <i>C9orf72</i> and <i>GRN</i>                                                                                                                                                                                                                                                                                                                                                                                                                                                                                                                                                                           | 0 (0.0%)                                         | 2 (2.4%)                                        | 0 (0.0%)           | 0 (0.0%)          | 0 (0.0%)          | 0 (0.0%)        | 0 (0.0%)            | 0 (0.0%)        | 0 (0.0%)            | 0 (0.0%)        |
| Other                                                                                                                                                                                                                                                                                                                                                                                                                                                                                                                                                                                                   | 0 (0.0%)                                         | 0 (0.0%)                                        | 4 (1.4%)           | 0 (0.0%)          | 2 (2.4%)          | 1 (1.2%)        | 0 (0.0%)            | 0 (0.0%)        | 0 (0.0%)            | 0 (0.0%)        |
| Unknown                                                                                                                                                                                                                                                                                                                                                                                                                                                                                                                                                                                                 | 0                                                | 0                                               | 11                 | 3                 | 1                 | 5               | 7                   | 1               | 0                   | 0               |
| Years of education                                                                                                                                                                                                                                                                                                                                                                                                                                                                                                                                                                                      | 16 (12, 22)                                      | 16 (10, 22)                                     | 16 (6, 26)         | 16 (10, 24)       | 16 (12, 21)       | 16 (12, 26)     | 16 (12, 24)         | 16 (9, 20)      | 16 (12, 20)         | 16 (12, 18)     |
| <b>CDR + NACC-FTLD global score</b>                                                                                                                                                                                                                                                                                                                                                                                                                                                                                                                                                                     |                                                  |                                                 |                    |                   |                   |                 |                     |                 |                     |                 |
| 0                                                                                                                                                                                                                                                                                                                                                                                                                                                                                                                                                                                                       | 144 (100.0%)                                     | 85 (100.0%)                                     | 0 (0.0%)           | 0 (0.0%)          | 0 (0.0%)          | 2 (2.2%)        | 1 (0.8%)            | 1 (1.8%)        | 1 (4.0%)            | 3 (25.0%)       |
| 0.5                                                                                                                                                                                                                                                                                                                                                                                                                                                                                                                                                                                                     | 0 (0.0%)                                         | 0 (0.0%)                                        | 19 (6.6%)          | 27 (37.5%)        | 11 (13.1%)        | 24 (27.0%)      | 22 (17.7%)          | 56 (98.2%)      | 2 (8.0%)            | 5 (41.7%)       |
| 1                                                                                                                                                                                                                                                                                                                                                                                                                                                                                                                                                                                                       | 0 (0.0%)                                         | 0 (0.0%)                                        | 96 (33.2%)         | 31 (43.1%)        | 48 (57.1%)        | 38 (42.7%)      | 49 (39.5%)          | 0 (0.0%)        | 9 (36.0%)           | 1 (8.3%)        |
| 2                                                                                                                                                                                                                                                                                                                                                                                                                                                                                                                                                                                                       | 0 (0.0%)                                         | 0 (0.0%)                                        | 148 (51.2%)        | 12 (16.7%)        | 24 (28.6%)        | 22 (24.7%)      | 42 (33.9%)          | 0 (0.0%)        | 10 (40.0%)          | 3 (25.0%)       |
| 3                                                                                                                                                                                                                                                                                                                                                                                                                                                                                                                                                                                                       | 0 (0.0%)                                         | 0 (0.0%)                                        | 26 (9.0%)          | 2 (2.8%)          | 1 (1.2%)          | 3 (3.4%)        | 10 (8.1%)           | 0 (0.0%)        | 3 (12.0%)           | 0 (0.0%)        |
| Number of individuals with longitudinal plasma samples                                                                                                                                                                                                                                                                                                                                                                                                                                                                                                                                                  | 79                                               | 58                                              | 39                 | 10                | 2                 | 14              | 10                  | 18              | –                   | –               |
| <b>Number of plasma visits</b>                                                                                                                                                                                                                                                                                                                                                                                                                                                                                                                                                                          |                                                  |                                                 |                    |                   |                   |                 |                     |                 |                     |                 |
| 2                                                                                                                                                                                                                                                                                                                                                                                                                                                                                                                                                                                                       | 41 (51.9%)                                       | 27 (46.6%)                                      | 23 (59.0%)         | 5 (50.0%)         | 2 (100.0%)        | 9 (64.3%)       | 6 (60.0%)           | 7 (38.9%)       | –                   | –               |
| 3                                                                                                                                                                                                                                                                                                                                                                                                                                                                                                                                                                                                       | 30 (38.0%)                                       | 19 (32.8%)                                      | 12 (30.8%)         | 4 (40.0%)         | 0 (0.0%)          | 5 (35.7%)       | 3 (30.0%)           | 6 (33.3%)       | –                   | –               |
| 4                                                                                                                                                                                                                                                                                                                                                                                                                                                                                                                                                                                                       | 8 (10.1%)                                        | 12 (20.7%)                                      | 4 (10.3%)          | 1 (10.0%)         | 0 (0.0%)          | 0 (0.0%)        | 1 (10.0%)           | 5 (27.8%)       | –                   | –               |
| Time from baseline to last plasma sampling (years)                                                                                                                                                                                                                                                                                                                                                                                                                                                                                                                                                      | 1.9 (0.5, 3.8)                                   | 2.0 (0.7, 3.8)                                  | 1.2 (0.5, 3.2)     | 0.2 (1.1, 3.1)    | 1.1 (1.0, 1.3)    | 0.8 (0.4, 3.1)  | 0.8 (0.5, 3.2)      | 2.1 (1.0, 3.4)  | –                   | –               |
| Other mutations include an intermediate <i>C9orf72</i> expansion (n = 1 CBS patient), a likely pathogenic <i>GRN</i> variant (n = 1 bvFTD patient), and <i>TARDBP</i> mutations (n = 3 bvFTD patients and n = 2 svPPA patients). Data for age at symptom onset and for symptom duration at baseline were not available for one patient with nvPPA, two patients with MCI, and two patients with FTD-ALS, CDR + NACC-FTLD, CDR Dementia Staging Instrument plus behavior and language domains from the National Alzheimer's Disease Coordinating Center FTLD module. See also <a href="#">Table S1</a> . |                                                  |                                                 |                    |                   |                   |                 |                     |                 |                     |                 |

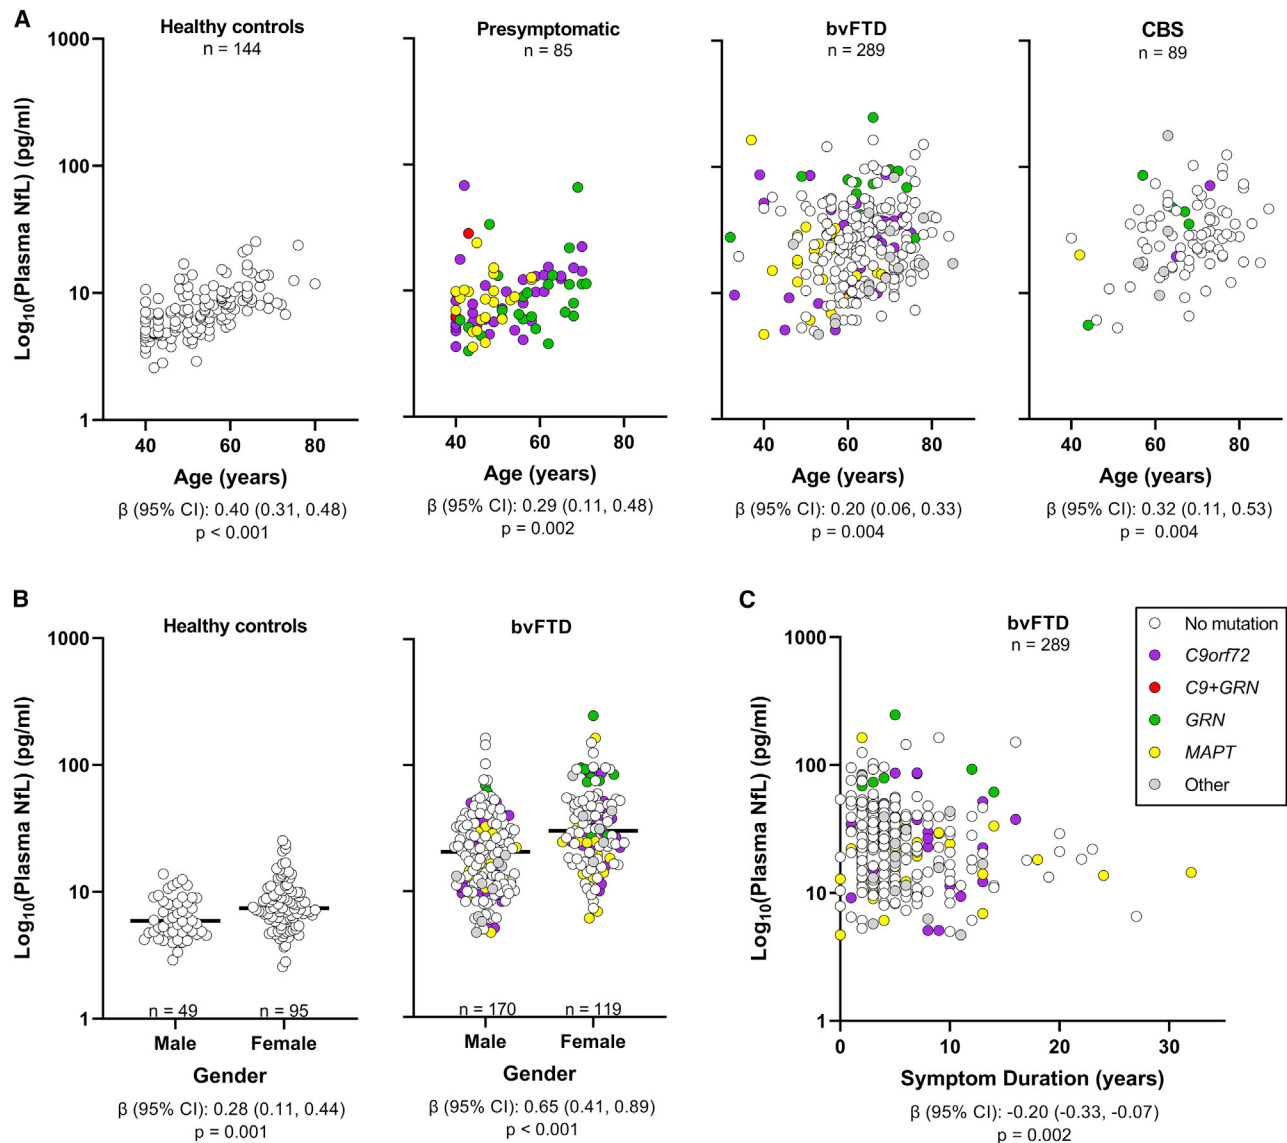

**Figure 1. Plasma NfL concentrations associate with age, gender, and symptom duration in some phenotype groups**

Associations of baseline NfL concentrations with age (A), gender (B), and symptom duration (C) assessed using linear regression models adjusted for age, gender, and symptom duration.  $\beta$  coefficients ( $\beta$ ), 95% confidence intervals (CIs), and  $p$  values are shown for significant associations, where  $p < 0.025$  is considered significant for controls and presymptomatic mutation carriers and  $p < 0.0167$  is considered significant for symptomatic groups. In (B), black horizontal bars represent median NfL concentrations. Gray circles represent 11 bvFTD patients and five CBS patients with unknown mutation status, one bvFTD patient with a likely pathogenic *GRN* variant and three with a *TARDBP* mutation, and one CBS patient with an intermediate *C9orf72* repeat expansion. NfL in plasma samples was measured in duplicate, and the mean concentration of replicates is shown on the base 10 logarithm scale. See Figures S1A–S1C to view NfL concentrations on the linear scale and also see Table S2. The number of individuals per group (n) is shown in figure panels and in Tables 1 and S1.

### Plasma NfL is elevated in FTD and discriminates controls from patients with mild to severe impairment

We compared baseline plasma NfL concentrations between controls and presymptomatic carriers with all groups (Figures 2A and S1D; Tables S3 and S4). Presymptomatic individuals had higher NfL compared with controls ( $p < 0.001$ ), which may be driven by their eventual phenoconversion. Indeed, compared to controls and to the 43 mutation carriers who remained asymptomatic for at least 1 year from baseline, the 14 presymptomatic

carriers who later phenoconverted had higher NfL ( $p < 0.001$ ; Figures 2B and S1E; Table S5). NfL was also higher in non-converters than in controls ( $p = 0.006$ ). The 28 presymptomatic individuals for whom conversion status could not be determined because of limited follow-up data (Table S1) were excluded from these analyses. For phenoconverters, median time from baseline to conversion was 1.3 years (range: 1.0–2.8 years), whereas median time from baseline to last follow-up for non-converters was 2.2 years (range: 1.0–4.8 years).

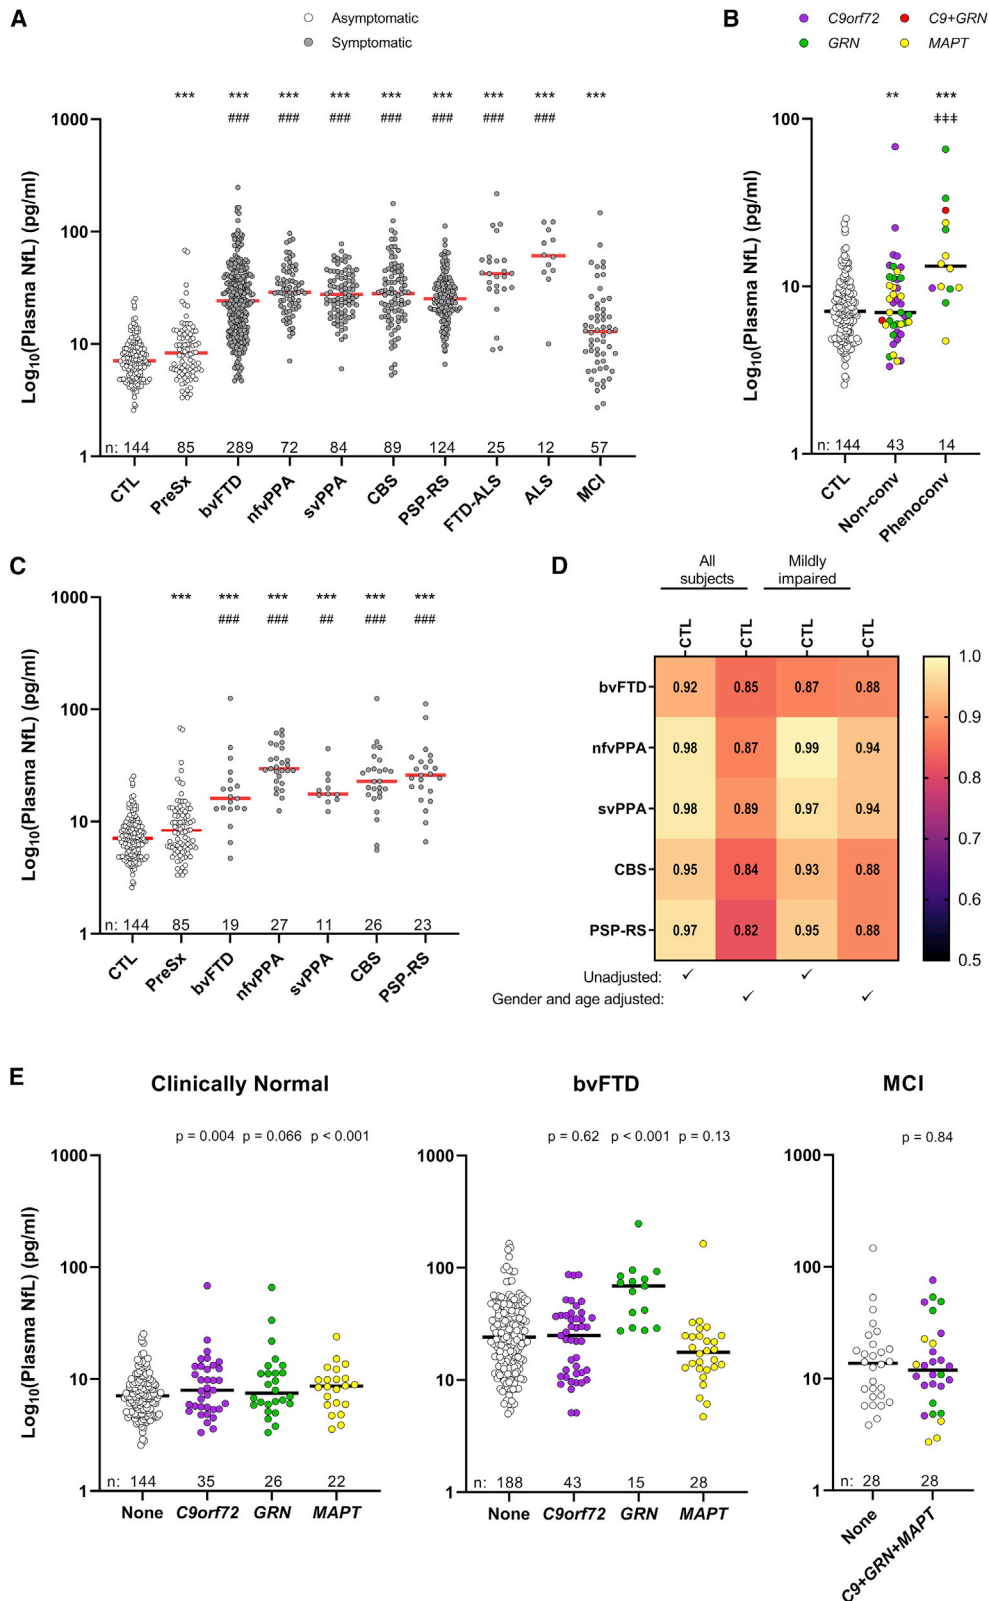

(legend on next page)

Baseline NfL was also higher in each symptomatic group than in controls, and it was higher in all groups except MCI in comparison to presymptomatic carriers ( $p < 0.001$ ; Figures 2A and S1D; Table S3). Results were similar after stratification by symptom duration (Table S4). Compared to NfL levels in controls or presymptomatic individuals, NfL was elevated even for patients with only questionable or minimal impairment as determined by a global score of 0 or 0.5 on the CDR Dementia Staging Instrument plus behavior and language domains from the National Alzheimer's Disease Coordinating Center Frontotemporal Lobar Degeneration module (CDR + NACC-FTLD)<sup>27</sup> ( $p \leq 0.003$ ; Figure 2C; Table S6).

When making baseline NfL pairwise comparisons between symptomatic groups, no difference in NfL levels was detected among bvFTD, nvPPA, svPPA, CBS, or PSP-RS (Figures 2A and S1D; Table S7). However, NfL was higher in ALS ( $p < 0.001$ ) than in any other group except FTD-ALS, and it was lower in MCI ( $p < 0.001$ ) than in any other group.

We examined whether baseline NfL could distinguish controls from symptomatic groups by estimating the area under receiver operating characteristic (AUC) curves. Age- and gender-adjusted AUC values were lowest for MCI (AUC = 0.68). AUCs for other symptomatic groups ranged from 0.82 to 0.97, indicating good to excellent discriminatory ability (Figure 2D; Table S3). When determining whether baseline NfL could distinguish presymptomatic carriers from symptomatic groups, we noted the lowest adjusted AUC value for MCI (AUC = 0.57), with other adjusted AUC estimates ranging from 0.69 to 0.93 (Table S3). Results were similar when we stratified by symptom duration (Table S4) and when we considered only patients with a global FTLD-CDR score of 0 or 0.5 (Figure 2D; Table S6). Finally, we assessed whether baseline NfL distinguishes presymptomatic phenoconverters from non-converters or controls. We found moderate to good discriminatory ability; NfL levels differentiated between controls and converters with an adjusted AUC of 0.85 and between non-converters and converters with an adjusted AUC of 0.78. A NfL cutoff of  $>10$  pg/mL identified 57.1% of converters, 20.8% of controls, and 30.2% of non-converters.

### Baseline plasma neurofilament by mutation status

We examined baseline NfL by mutation status for cohorts having at least 30% of individuals with a mutation in *C9orf72*, *GRN*, or *MAPT* (i.e., clinically normal individuals [controls or presymptomatic mutation carriers] and patients with MCI or bvFTD;

Figure 2E; Table S8). The previously seen increase in NfL in presymptomatic individuals compared to controls appeared most prominent for *C9orf72* ( $p = 0.004$ ) and *MAPT* ( $p < 0.001$ ) mutation carriers, with a weaker increase for *GRN* carriers ( $p = 0.066$ ). However, NfL levels did not differ among mutation groups (Table S9). Compared to bvFTD patients with no mutation, only *GRN* carriers had higher NfL ( $p < 0.001$ ; Table S8). NfL was also higher in *GRN* carriers with bvFTD than in *C9orf72* and *MAPT* carriers ( $p < 0.001$ ; Table S9). There was no difference in NfL between MCI patients with or without a mutation (Table S8).

### Plasma NfL correlates with indicators of disease severity

To determine the prognostic potential of plasma NfL, we evaluated, for each FTD spectrum disorder separately and for all groups combined, associations of baseline NfL with baseline indicators of clinical severity (CDR + NACC-FTLD sum of boxes [sb]), global cognitive function (Montreal Cognitive Assessment [MoCA]), social changes (Social Norms Questionnaire [SNQ]), language deficits (Northwestern Anagram Test [NAT]; Multilingual Naming Test [MINT]; phonemic fluency; category fluency), and executive dysfunction (Digit Span Forward and Backward; Trail Making Test Part B [Trails B]). Test scores by group are provided in Table S10.

Higher NfL associated with worse performance on all tests for all FTD groups combined and for bvFTD alone ( $p \leq 0.003$ ; Tables 2 and S11). Significant ( $p < 0.005$ ) or nominally significant ( $p < 0.05$ ) associations with NfL were seen for nvPPA (Digit Span Forward), svPPA (CDR + NACC-FTLDsb, MoCA, NAT, MINT, phonemic and category fluency, and Digit Span Backward), CBS (CDR + NACC-FTLDsb, phonemic fluency, and Digit Span Backward), PSP-RS (MoCA, SNQ, phonemic and category fluency, Digit Span Forward and Backward, and Trails B), and MCI (CDR + NACC-FTLDsb and MoCA). For these smaller phenotype groups, where power to detect associations is lower, estimated  $\beta$  coefficients were similar or stronger than those observed for the larger bvFTD group.

We also evaluated whether baseline NfL associates with rates of change in indicators of disease severity for individuals with longitudinal clinical data spanning at least 1 year from baseline. This allowed the study of bvFTD patients alone and patients with bvFTD, nvPPA, svPPA, CBS, and PSP-RS combined (Table S12). In bvFTD patients, increased baseline NfL associated

### Figure 2. Baseline plasma NfL is elevated in presymptomatic mutation carriers and all symptomatic groups

(A) Comparison of baseline plasma NfL between healthy controls or presymptomatic mutation carriers and symptomatic groups.  
(B) Comparison of baseline NfL between presymptomatic carriers who phenoconverted and controls or presymptomatic carriers who remained asymptomatic for at least 1 year.  
(C) Comparison of baseline NfL between controls or presymptomatic carriers and patients in symptomatic groups with a CDR + NACC-FTLD global score of 0 or 0.5.  
(D) Heatmap showing AUCs comparing controls to the indicated groups that include all individuals of a given group (all subjects) or only those with an CDR + NACC-FTLD global score of 0 or 0.5 (mildly impaired) from unadjusted or age- and gender-adjusted analyses.  
(E) Comparison of baseline plasma NfL between non-mutation carriers and mutation carriers for clinically normal individuals and patients with bvFTD or MCI. Data in (E) do not include the two presymptomatic carriers with a mutation in both *C9orf72* and *GRN*. p values are from analysis adjusted for age and gender. \*\*\* $p < 0.001$  and \*\* $p < 0.01$ , comparison to controls; ### $p < 0.001$  and ## $p = 0.003$ , comparison to presymptomatic carriers; +++ $p < 0.001$ , comparison with presymptomatic non-converters. Horizontal bars represent median NfL concentrations. NfL in plasma samples was measured in duplicate, and the mean concentration of replicates is shown on the base 10 logarithm scale. See Figures S1D and S1E to view NfL concentrations on the linear scale. Relating to (A)–(D), see also Tables S3–S7. Relating to (E), see also Tables S8 and S9. The number of individuals per group (n) is shown in figure panels and in Tables 1 and S1.

**Table 2. Associations of baseline NfL with indicators of disease severity**

| Phenotype group | Association between NfL and:      |                                      |                                      |                                      |                                      |                                      |                                      |                                      |                                      |                                      |
|-----------------|-----------------------------------|--------------------------------------|--------------------------------------|--------------------------------------|--------------------------------------|--------------------------------------|--------------------------------------|--------------------------------------|--------------------------------------|--------------------------------------|
|                 | CDR + NACC-FTLDsb                 | MoCA                                 | SNQ                                  | NAT                                  | MINT                                 | Phonemic fluency                     | Category fluency                     | Digit span forward                   | Digit span backward                  | Trails B                             |
| All FTD groups  | n = 658                           | n = 593                              | n = 543                              | n = 483                              | n = 563                              | n = 579                              | n = 579                              | n = 582                              | n = 576                              | n = 441                              |
| β (95% CI)      | 0.04<br>(0.03, 0.06) <sup>a</sup> | -2.22<br>(-2.79, -1.65) <sup>a</sup> | -0.92<br>(-1.19, -0.64) <sup>a</sup> | -0.88<br>(-1.15, -0.61) <sup>a</sup> | -2.13<br>(-2.96, -1.30) <sup>a</sup> | -4.10<br>(-4.87, -3.33) <sup>a</sup> | -4.00<br>(-4.94, -3.07) <sup>a</sup> | -0.50<br>(-0.73, -0.27) <sup>a</sup> | -0.81<br>(-1.04, -0.58) <sup>a</sup> | 15.87<br>(6.66, 25.09) <sup>a</sup>  |
| p value         | <0.001 <sup>a</sup>               | <0.001 <sup>a</sup>                  | <0.001 <sup>a</sup>                  | <0.001 <sup>a</sup>                  | <0.001 <sup>a</sup>                  | <0.001 <sup>a</sup>                  | <0.001 <sup>a</sup>                  | <0.001 <sup>a</sup>                  | <0.001 <sup>a</sup>                  | <0.001 <sup>a</sup>                  |
| bvFTD           | n = 289                           | n = 267                              | n = 236                              | n = 215                              | n = 251                              | n = 255                              | n = 252                              | n = 263                              | n = 257                              | n = 179                              |
| β (95% CI)      | 0.06<br>(0.04, 0.09) <sup>a</sup> | -2.33<br>(-3.10, -1.56) <sup>a</sup> | -1.11<br>(-1.51, -0.72) <sup>a</sup> | -1.05<br>(-1.43, -0.68) <sup>a</sup> | -2.31<br>(-3.27, -1.35) <sup>a</sup> | -5.00<br>(-6.03, -3.96) <sup>a</sup> | -5.37<br>(-6.64, -4.09) <sup>a</sup> | -0.50<br>(-0.82, -0.18) <sup>a</sup> | -0.96<br>(-1.30, -0.62) <sup>a</sup> | 18.73<br>(6.34, 31.13) <sup>a</sup>  |
| p value         | <0.001 <sup>a</sup>               | <0.001 <sup>a</sup>                  | <0.001 <sup>a</sup>                  | <0.001 <sup>a</sup>                  | <0.001 <sup>a</sup>                  | <0.001 <sup>a</sup>                  | <0.001 <sup>a</sup>                  | 0.002 <sup>a</sup>                   | <0.001 <sup>a</sup>                  | 0.003 <sup>a</sup>                   |
| nfvPPA          | n = 72                            | n = 61                               | n = 57                               | n = 57                               | n = 57                               | n = 54                               | n = 56                               | n = 58                               | n = 58                               | n = 50                               |
| β (95% CI)      | 0.03<br>(-0.01, 0.07)             | -2.33<br>(-4.74, 0.07)               | -1.05<br>(-2.21, 0.10)               | -0.71<br>(-1.88, 0.46)               | -0.09<br>(-2.63, 2.45)               | -2.30<br>(-4.88, 0.28)               | -1.68<br>(-5.66, 2.30)               | -1.16<br>(-1.84, -0.48) <sup>a</sup> | -0.74<br>(-1.52, 0.04)               | 33.22<br>(-1.91, 68.34)              |
| p value         | 0.17                              | 0.057                                | 0.074                                | 0.23                                 | 0.94                                 | 0.079                                | 0.40                                 | 0.001 <sup>a</sup>                   | 0.063                                | 0.063                                |
| svPPA           | n = 84                            | n = 80                               | n = 69                               | n = 70                               | n = 67                               | n = 79                               | n = 75                               | n = 71                               | n = 73                               | n = 74                               |
| β (95% CI)      | 0.06<br>(0.01, 0.10) <sup>b</sup> | -2.92<br>(-4.89, -0.95) <sup>a</sup> | -1.06<br>(-2.12, 0.00)               | -1.46<br>(-2.34, -0.57) <sup>a</sup> | -4.97<br>(-7.83, -2.11) <sup>a</sup> | -2.83<br>(-5.66, -0.00) <sup>b</sup> | -4.87<br>(-7.68, -2.05) <sup>a</sup> | -0.87<br>(-1.80, 0.07)               | -1.16<br>(-2.02, -0.29) <sup>b</sup> | 15.03<br>(-11.92, 41.98)             |
| p value         | 0.009 <sup>b</sup>                | 0.004 <sup>a</sup>                   | 0.051                                | 0.002 <sup>a</sup>                   | <0.001 <sup>a</sup>                  | 0.050 <sup>b</sup>                   | 0.001 <sup>a</sup>                   | 0.069                                | 0.009 <sup>b</sup>                   | 0.27                                 |
| CBS             | n = 89                            | n = 71                               | n = 76                               | n = 59                               | n = 75                               | n = 76                               | n = 78                               | n = 77                               | n = 76                               | n = 56                               |
| β (95% CI)      | 0.05<br>(0.01, 0.09) <sup>b</sup> | -1.33<br>(-2.88, 0.23)               | 0.04<br>(-0.48, 0.56)                | -0.45<br>(-1.13, 0.23)               | -0.29<br>(-1.11, 0.53)               | -2.46<br>(-4.57, -0.35) <sup>b</sup> | -0.33<br>(-2.88, 2.22)               | -0.03<br>(-0.76, 0.70)               | -0.63<br>(-1.18, -0.07) <sup>b</sup> | 5.83<br>(-20.79, 32.45)              |
| p value         | 0.024 <sup>b</sup>                | 0.094                                | 0.88                                 | 0.19                                 | 0.49                                 | 0.023 <sup>b</sup>                   | 0.80                                 | 0.94                                 | 0.027 <sup>b</sup>                   | 0.66                                 |
| PSP-RS          | n = 124                           | n = 114 <sup>b</sup>                 | n = 105 <sup>b</sup>                 | n = 82                               | n = 113                              | n = 115                              | n = 118                              | n = 113                              | n = 112                              | n = 82                               |
| β (95% CI)      | 0.03<br>(-0.00, 0.06)             | -1.58<br>(-2.93, -0.24) <sup>b</sup> | -0.71<br>(-1.32, -0.10) <sup>b</sup> | -0.17<br>(-0.90, 0.56)               | -1.01<br>(-2.30, 0.28)               | -2.89<br>(-4.79, -1.00) <sup>a</sup> | -2.95<br>(-4.89, -1.00) <sup>a</sup> | -0.73<br>(-1.30, -0.16) <sup>b</sup> | -0.71<br>(-1.20, -0.22) <sup>b</sup> | 35.81<br>(12.61, 59.02) <sup>a</sup> |
| p value         | 0.051                             | 0.022 <sup>b</sup>                   | 0.024 <sup>b</sup>                   | 0.64                                 | 0.12                                 | 0.003 <sup>a</sup>                   | 0.003 <sup>a</sup>                   | 0.012 <sup>b</sup>                   | 0.005 <sup>b</sup>                   | 0.003 <sup>a</sup>                   |
| MCI             | n = 57                            | n = 57                               | n = 56                               | n = 49                               | n = 56                               | n = 56                               | n = 56                               | n = 57                               | n = 57                               | n = 56                               |
| β (95% CI)      | 0.29<br>(0.01, 0.57) <sup>b</sup> | -0.93<br>(-1.83, -0.03) <sup>b</sup> | -0.37<br>(-0.97, 0.24)               | 0.03<br>(-0.45, 0.50)                | -0.93<br>(-2.21, 0.36)               | -0.55<br>(-2.52, 1.42)               | -2.06<br>(-4.53, 0.40)               | 0.08<br>(-0.50, 0.66)                | -0.06<br>(-0.68, 0.57)               | 5.16<br>(-10.37, 20.70)              |
| p value         | 0.040 <sup>b</sup>                | 0.044 <sup>b</sup>                   | 0.23                                 | 0.91                                 | 0.15                                 | 0.58                                 | 0.10                                 | 0.78                                 | 0.85                                 | 0.51                                 |

β values, 95% CIs, and p values result from linear regression models that were adjusted for age, gender, symptom duration, and years of education. β values are interpreted as the change in the mean value of the given disease indicator for each doubling of NfL level. The FTD group includes patients with bvFTD, nfvPPA, svPPA, CBS, or PSP-RS. See also [Tables S10–S12](#).

β, regression coefficient; CI, confidence interval; CDR + NACC-FTLDsb, CDR Dementia Staging Instrument plus behavior and language domains from the National Alzheimer’s Disease Coordinating Center FTLD module sum of boxes; MINT, Multilingual Naming Test; MoCA, Montreal Cognitive Assessment; NAT, Northwestern Anagram Test; SNQ, Social Norms Questionnaire; Trails B, Trail Making Test Part B.

<sup>a</sup>p < 0.005 is considered as statistically significant after correcting for multiple testing.

<sup>b</sup>Nominally significant p < 0.05.



with a faster longitudinal decline in performance for the CDR + NACC-FTLDSb, MoCA, and category fluency test ( $p \leq 0.001$ ). Nominally significant associations were noted for the MINT ( $p = 0.030$ ) and Trails B ( $p = 0.018$ ). Findings were similar for the combined group of FTD syndromes.

### Plasma NfL increases throughout presymptomatic and symptomatic disease phases

In Figure 3A, we show longitudinal NfL profiles for controls, presymptomatic carriers, and patients with MCI, bvFTD, PPA (nfvPPA and svPPA), or parkinsonian disorders (CBS and PSP-RS). For individuals with an NfL measurement at least 1 year from baseline, we compared temporal NfL trajectories across groups by determining the rate of NfL concentration change per year (Figure 3B; Table S13). The rate of NfL change was greater for presymptomatic carriers who later phenoconverted, MCI patients, bvFTD patients, and the combined group of patients with nfvPPA or svPPA than for controls ( $p < 0.001$ ). No difference in the rate of NfL change was seen between presymptomatic phenoconverters and patient groups, but phenoconverters had a nominally significant higher rate of NfL change than non-converters ( $p = 0.008$ ; Figure 3B; Table S14). We thus assessed whether rate of NfL change can distinguish converters from non-converters or controls. We found that the rate of NfL change distinguished controls from converters with an adjusted AUC of 0.76 (95% confidence interval [CI]: 0.58–0.93) and distinguished non-converters from converters with an adjusted AUC of 0.74 (95% CI: 0.57–0.92). A cutoff value of  $>2.5$  pg/mL of NfL per year identified 50.0% of converters, 4.4% of controls, and 5.7% of non-converters. Combining information from rate of NfL change and baseline NfL to differentiate between converters and non-converters was not more effective than using the individual measures themselves, as evidenced by an unchanged AUC.

We next evaluated longitudinal NfL concentrations and rates of NfL change by mutation status in presymptomatic individuals and bvFTD patients (Figures 4A and 4B; Table S13). Nominally significant increases in the rate of NfL change were noted for all presymptomatic carriers combined ( $p = 0.029$ ) and *GRN* mutation carriers alone ( $p = 0.012$ ) when compared to controls. No difference in the rate of NfL change was seen among presymptomatic *C9orf72*, *GRN*, or *MAPT* mutation carriers (Table S15). For bvFTD, all mutation carriers combined, and *MAPT* carriers alone, had faster rates of NfL increases than did controls ( $p < 0.001$ ; Table S13). Comparisons of rates of NfL change in bvFTD patients with no mutation or with a *GRN* mutation to controls were not examined since these groups had only four individuals with a second NfL measure more than 1 year from baseline. Finally, we show in Figure 5 the temporal profiles of NfL for individuals whose clinical diagnosis changed during their disease course.

## DISCUSSION

Through this cross-sectional and longitudinal study of the largest cohort of patients with sporadic or genetic bvFTD, nfvPPA, svPPA, CBS, or PSP-RS and clinically normal individuals with or without FTD-causing mutations, we show that plasma NfL in-

creases prior to phenoconversion in presymptomatic mutation carriers; is significantly elevated in all studied FTD spectrum disorders, including mild cases; and associates with multiple indicators of disease severity.

Our observation that plasma NfL is higher in bvFTD, nfvPPA, svPPA, CBS, and PSP-RS compared with controls is consistent with prior reports.<sup>13,14,21–23</sup> We saw no difference in baseline NfL among FTD syndromes. While no previous study compared blood NfL among all syndromes, those that did perform group comparisons observed comparable NfL concentrations between nfvPPA and svPPA<sup>15,18</sup> or among nfvPPA, svPPA, and bvFTD.<sup>13</sup> Thus, while NfL does have utility in confirming the presence of neurodegeneration, it is insufficient to discriminate between FTD syndromes.

That plasma NfL was elevated in FTD patients presenting with only mild symptoms and can distinguish these patients from healthy controls suggests that NfL may inform the diagnosis of questionable cases and allow a more rapid diagnosis. One study estimates that almost half of FTD patients are diagnosed more than 1 year after first symptoms.<sup>28</sup> Diagnostic workups for patients routinely include imaging and neuropsychological testing, but the additional implementation of plasma NfL has the potential to reduce diagnostic delay and thereby improve the care of patients and allow their earlier participation in clinical trials.

Plasma NfL may also prove useful in detecting disease progression in presymptomatic mutation carriers. We show that, compared to measures in controls or presymptomatic mutation carriers who did not phenoconvert, baseline plasma NfL and rates of NfL change were higher in presymptomatic carriers before phenoconversion. These data validate and extend prior cross-sectional<sup>24</sup> and longitudinal<sup>20,25,26</sup> studies. For example, Rojas et al.<sup>24</sup> found that median baseline plasma NfL concentrations were higher in presymptomatic carriers who showed phenoconversion in a cohort comprising a subset of individuals in the present study, and van der Ende et al.<sup>20</sup> similarly reported higher baseline serum NfL in presymptomatic converters than in non-converters. Moreover, in a study by Saracino et al.,<sup>25</sup> four presymptomatic *C9orf72* expansion carriers with elevated rates of change in plasma NfL moved to the prodromal and symptomatic disease stage at follow-up. Yet four other presymptomatic individuals with high baseline NfL or rate of NfL change did not phenoconvert during the examined time frame. While data from these studies and ours indicate that plasma NfL could facilitate the identification of presymptomatic mutation carriers approaching phenoconversion, they also suggest that additional traits, such as mutation status, brain atrophy, and neuropsychological test scores, will likely be needed to better approximate when phenoconversion will occur and to select suitable individuals at risk of phenoconversion to participate in clinical trials designed to prevent or delay symptom onset and progression.

As with phenoconverters, patients with MCI, bvFTD, or PPA, but not patients with parkinsonian disorders, had higher rates of NfL change than did controls. Though longitudinal data were relatively limited, our data suggest that NfL generally increases over time in patients with MCI, bvFTD, and PPA. Were routine plasma NfL measures to be incorporated into the standard of care for FTD patients, baseline NfL or its rate of change could

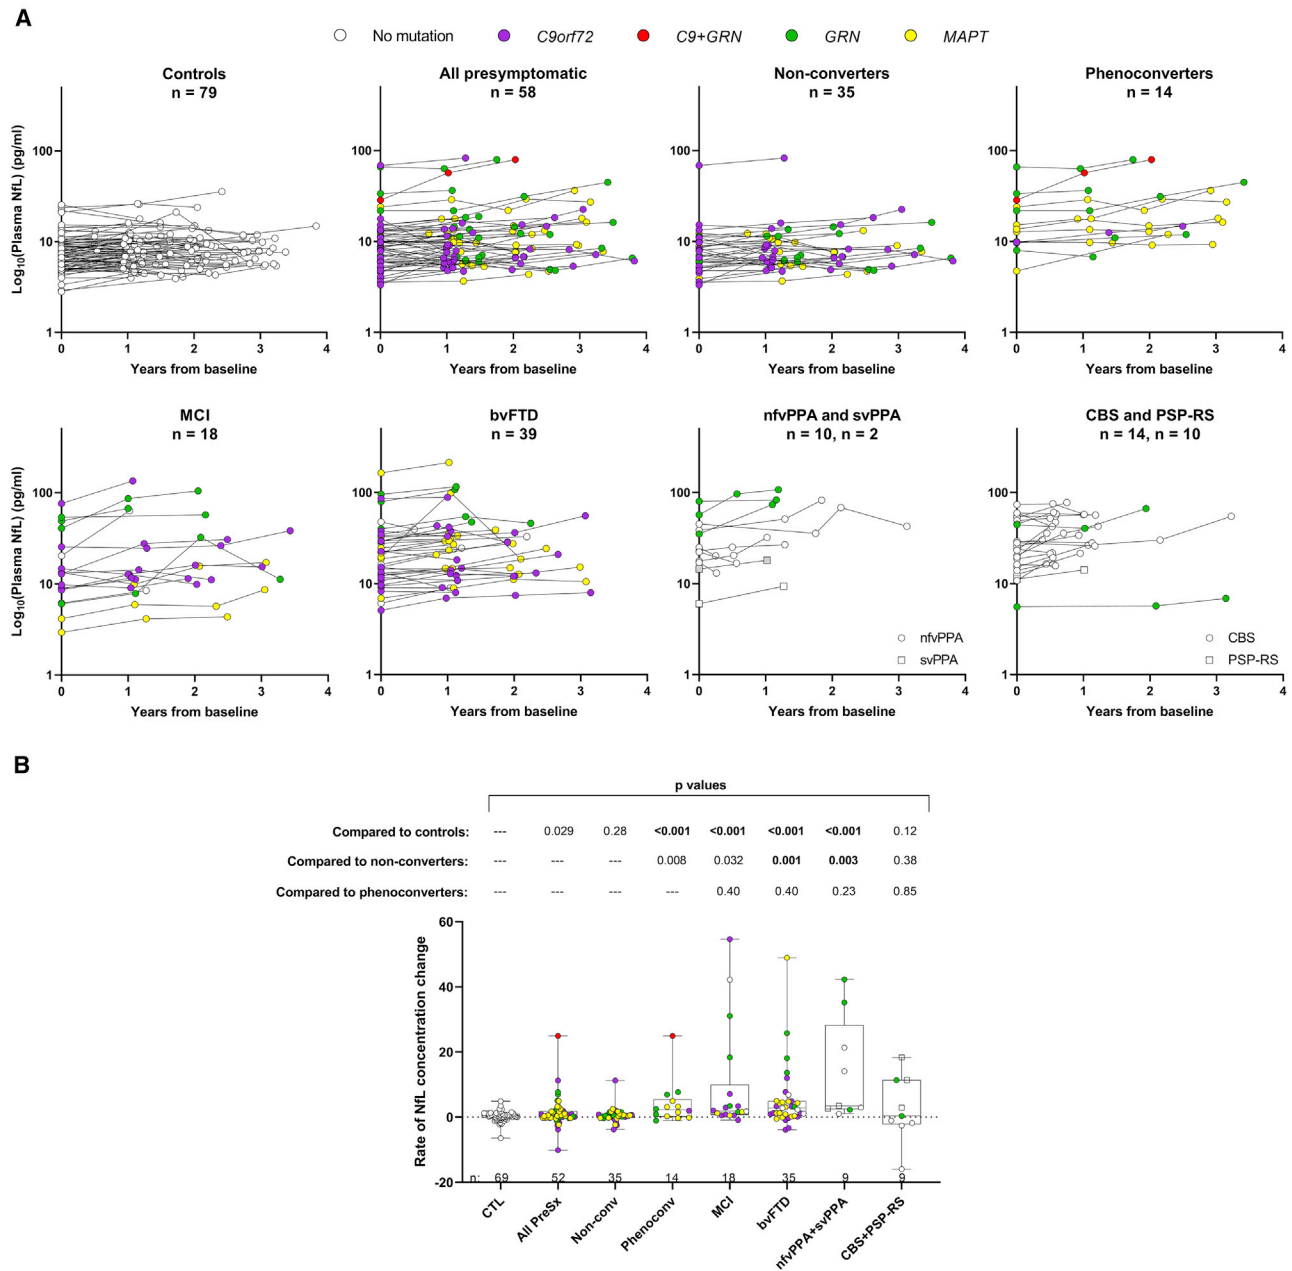

**Figure 3. Plasma NfL increases throughout presymptomatic and symptomatic disease phases**

(A) Longitudinal NfL concentrations are depicted for the indicated phenotype groups. NfL in plasma samples was measured in duplicate, and the mean concentration of replicates is shown on the base 10 logarithm scale.

(B) For individuals with one or more serial NfL measurements at least 1 year from baseline, we show comparisons of rate of change in NfL concentration per year for controls, all presymptomatic mutation carriers (all PreSx), presymptomatic carriers who did not convert (non-conv), those that did phenoconvert (phenoconv), and patients with MCI, bvFTD, PPA, or parkinsonian disorders. p values from analysis comparing rates of NfL change between the indicated group and either controls, non-converters, or phenoconverters after adjusting for age and gender are shown.

The number of individuals per group (n) is shown in figure panels and in Tables 1 and S1. See also Tables S13 and S14.

be compared pre- and post-treatment for individuals enrolled in clinical trials and conceivably serve as a pharmacodynamic biomarker of therapeutic response.

To estimate the prognostic power of NfL for each FTD syndrome, we examined associations of baseline plasma NfL with

indicators of global cognitive function, social change, language deficits, and executive dysfunction. In the largest group of bvFTD patients, higher NfL associated with worse performance at baseline on all assessments and with a faster longitudinal decline in performance on the CDR + NACC-FTLDSb, the

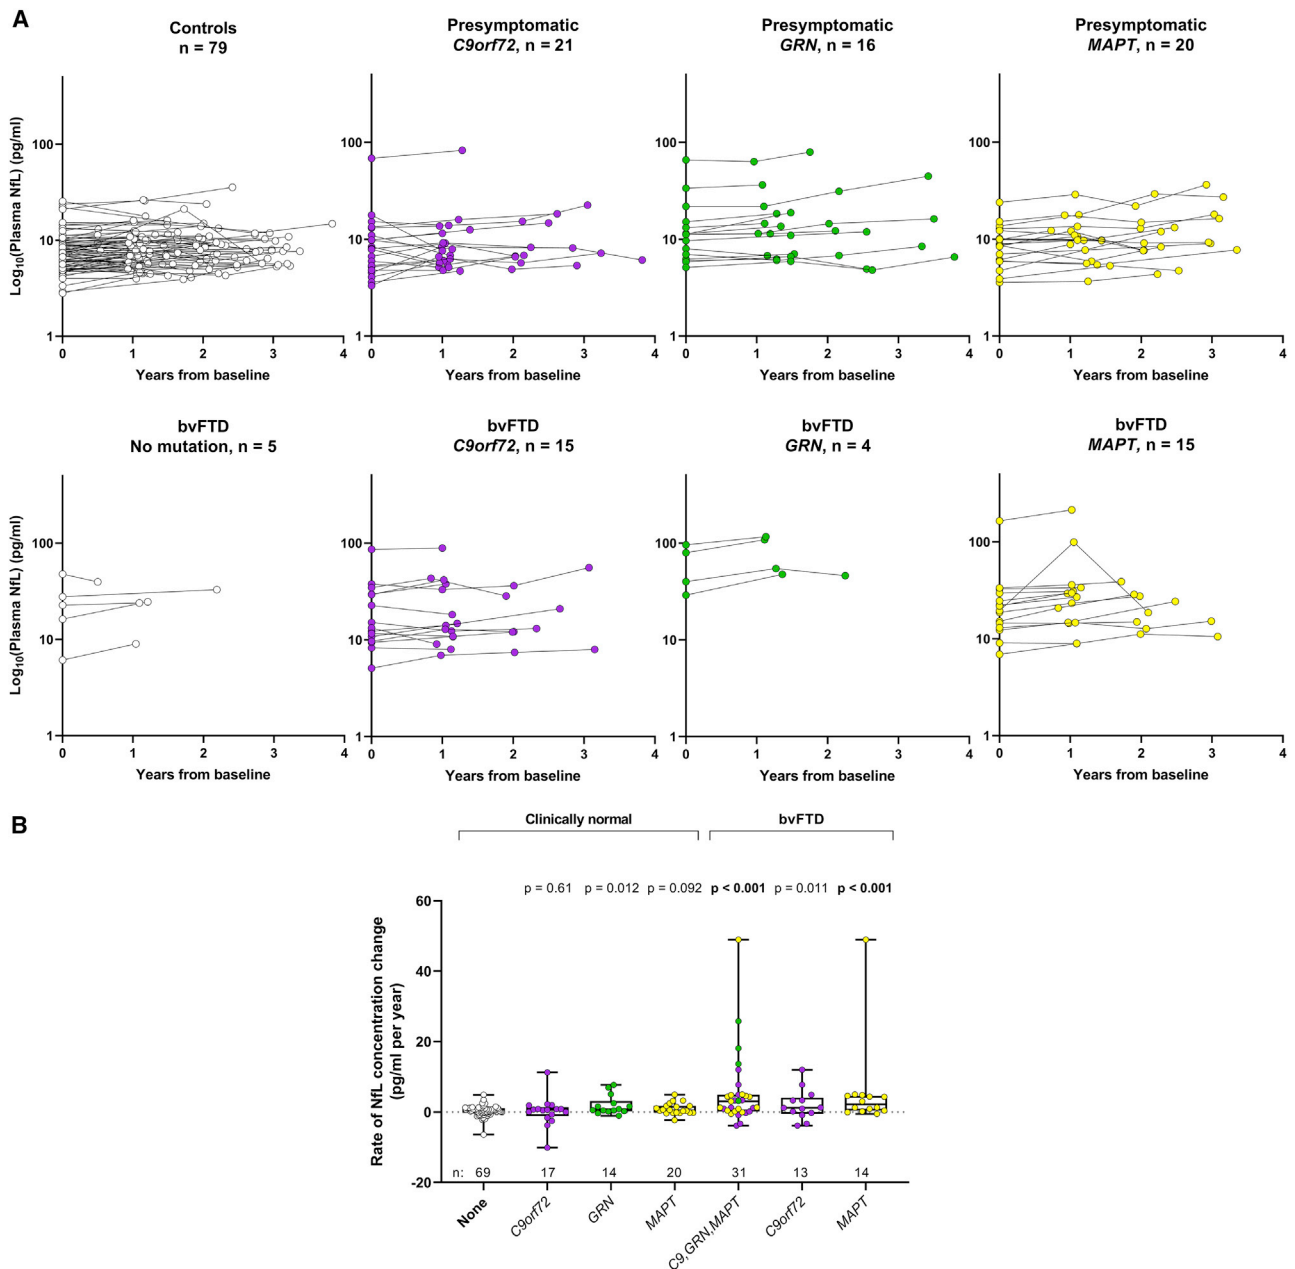

**Figure 4. Longitudinal profiles and rates of NfL change in presymptomatic individuals and patients with bvFTD according to mutation status**

(A) Longitudinal NfL concentrations are depicted for clinically normal individuals and bvFTD patients with no mutation or a mutation in *C9orf72*, *GRN*, or *MAPT*. NfL in plasma samples was measured in duplicate, and the mean concentration of replicates is shown on the base 10 logarithm scale.

(B) For individuals with one or more serial NfL measurements at least 1 year from baseline, we show comparisons of rate of change in NfL concentration per year between controls and presymptomatic mutation carriers or bvFTD patients according to mutation status. Patients with bvFTD without a mutation (n = 4) or with a *GRN* mutation (n = 4) were not included in the analysis. p values from analysis comparing rates of NfL change between the indicated group and controls after adjusting for age and gender are presented.

Longitudinal data for the presymptomatic carrier with a mutation in both *C9orf72* and *GRN* are not included in (A) or (B). The number of individuals per group (n) is shown in figure panels and in Tables 1 and S1. See also Tables S13 and S15.

MoCA, and the category fluency test. For the smaller phenotype groups of nvPPA, svPPA, CBS, and PSP-RS, associations were observed for some, but not all, assessment scores. Of note, however, the estimated  $\beta$  coefficients (a measure of effect

strength) for these groups were similar or stronger than those for bvFTD. Moreover, because each syndrome is characterized, at least initially, by a predominant clinical trait, it is expected that associations of NfL with only some disease indicators would be

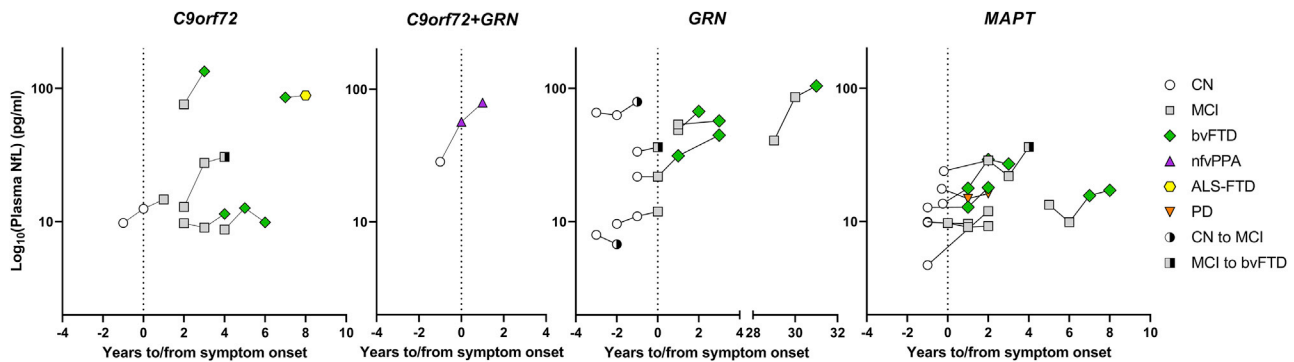

**Figure 5. Temporal trajectories of plasma NfL in presymptomatic individuals and individuals with MCI who phenoconverted according to mutation status**

Shown, according to mutation status, are longitudinal NfL concentrations for 23 mutation carriers who phenoconverted (i.e., 14 from presymptomatic to symptomatic and nine from MCI to bvFTD). For five individuals, plasma NfL was not available from the follow-up visit at which their diagnosis changed; these individuals are marked by a white circle partially shaded in black for clinically normal individuals later diagnosed with MCI or by a gray square partially shaded in black for a patient with MCI subsequently diagnosed with bvFTD. NfL in plasma samples was measured in duplicate, and mean concentrations are shown on the base 10 logarithm scale. CN, clinically normal; PD, Parkinson's disease.

observed for a given group. Comparing our findings with prior observations is complicated by differences in clinical assessments, cohort sizes, and the grouping of patients with different FTD syndromes, which may mask associations otherwise seen for a given syndrome. For example, in a cohort of patients with an FTD syndrome having underwent multiple psychometric assessments, serum NfL only correlated with executive dysfunction measures, but these did not survive correction for multiple testing.<sup>12</sup> In contrast, another study found serum NfL associated with worse CDRsb, but not with Mini-Mental State Exam (MMSE) scores in mutation carriers with an FTD syndrome.<sup>5</sup> These findings differ from our observed associations of NfL with CDR + NACC-FTLDSb and MoCA scores (an alternative cognition test to the MMSE) and measures of executive dysfunction in some phenotype groups. Data from the few studies that examined a particular FTD syndrome are more in line with our findings. For instance, NfL was reported to associate with the extent of semantic impairment in svPPA patients,<sup>19</sup> with MMSE and CDR + NACC-FTLDSb scores in bvFTD patients,<sup>14</sup> and with MMSE scores and cognitive disability in PSP-RS patients.<sup>22</sup>

Strengths of our study include evaluating the largest series of plasma NfL from well-characterized patients with bvFTD, nvPPA, svPPA, PSP-RS, and CBS along with pre-presymptomatic mutation carriers and controls; performing all NfL measurements at one site to allow direct group comparisons; including cross-sectional and longitudinal assessments of plasma NfL; and examining the prognostic potential of NfL separately for each syndrome. Of equal if not more importance, our NfL data, along with extensive clinical data beyond what are shown in the present study, are available to the scientific community through ALLFTD.

Our data support the utility of plasma NfL for improving patient care and overcoming major barriers in clinical trial design, which we hope will expedite the discovery of effective FTD treatments. By facilitating the estimation of phenoconversion in individuals at genetic risk of FTD, and their earlier diagnosis, plasma NfL would aid in the selection of participants for prevention or early treatment trials. As a marker of disease severity and progression,

NfL would also enable a more balanced stratification of patients with slowly or rapidly progressing disease in clinical trial treatment arms. This would improve clinical trial efficiency and the evaluation of treatment outcomes. The latter is a key challenge when conducting FTD clinical trials because of the heterogeneity among FTD patients.<sup>29</sup> Overall, we show that plasma NfL represents a promising susceptibility and prognostic biomarker for FTD. In addition to these important observations, our major informational database comprising cross-sectional and longitudinal NfL, demographic, genetic, clinical, and neuropsychological data is sure to ignite new lines of investigation on FTD spectrum disorders.

#### Limitations of the study

Participants enrolled in this study may not represent the general FTD patient population, and diagnoses were made based on clinical assessments and were not neuropathologically confirmed. Also, the relatively small sample sizes of some groups may have resulted in a lack of power to detect some associations, raising the possibility of a type II error (i.e., a false-negative finding).

#### ALLFTD CONSORTIUM MEMBERS

Brian S. Appleby, Sami Barnada, Yvette Bordelon, Hugo Botha, Danielle Brushaber, David Clark, Giovanni Coppola, Ryan Darby, Katrina Devick, Dennis Dickson, Kelley Faber, Anne Fagan, Julie A. Fields, Ralitzha Gavriloova, Daniel Geschwind, Jill Goldman, Jonathan Graff-Radford, Ian Grant, David T. Jones, Kejal Kantarci, Diana Kerwin, David S. Knopman, John Kornak, Walter Kremers, Maria Lapid, Argentina Lario Lago, Peter Ljubenkov, Diane Lucente, Ian R. Mackenzie, Scott McGinnis, Carly Mester, Bruce L. Miller, Peter Pressman, Rosa Rademakers, Vijay K. Ramanan, E. Marisa Ramos, Katherine P. Rankin, Meghana Rao, Katya Ras-covsky, Rodolfo Savica, William Seeley, Adam M. Staffaroni, Jeremy Syrjanen, Jack Taylor, Lawren VandeVrede, Sandra Weintraub, and Bonnie Wong

## STAR★METHODS

Detailed methods are provided in the online version of this paper and include the following:

- **KEY RESOURCES TABLE**
- **RESOURCE AVAILABILITY**
  - Lead contact
  - Materials availability
  - Data and code availability
- **EXPERIMENTAL MODEL AND SUBJECT DETAILS**
  - Protocol approvals and patient consents
  - Human subject characteristics
  - Clinical procedures
- **METHOD DETAILS**
  - Plasma neurofilament concentration determination
- **QUANTIFICATION AND STATISTICAL ANALYSIS**
  - Associations of plasma NfL with age, gender and symptom duration
  - Comparisons of baseline NfL concentrations among phenotype groups
  - Comparisons of baseline NfL concentrations according to mutation status
  - Determination of rates of change in NfL concentrations and in indicators of disease severity
  - Determination of the discriminatory power of baseline NfL
  - Associations of baseline plasma NfL with indicators of disease severity
  - Comparisons of rate of change in NfL concentrations between controls or presymptomatic mutation carriers and other phenotype groups and by mutation status
- **ADDITIONAL RESOURCES**

## SUPPLEMENTAL INFORMATION

Supplemental information can be found online at <https://doi.org/10.1016/j.xcrm.2022.100607>.

## ACKNOWLEDGMENTS

Data collection and dissemination were supported by the ALLFTD Consortium (U19AG063911; funded by the National Institute on Aging [NIA] and the National Institute of Neurological Diseases and Stroke [NINDS]) and the former ARTFL and LEFFTDS Consortia (ARTFL: U54NS092089, funded by the NINDS and National Center for Advancing Translational Sciences; LEFFTDS: U01AG045390, funded by the NIA and NINDS). The manuscript was reviewed by the ALLFTD Executive Committee. Samples from the National Centralized Repository for Alzheimer's Disease and Related Dementias (NCRAD), which receives government support under a cooperative agreement grant (U24AG021886) awarded by the NIA, were used in this study. We thank contributors who collected samples used in this study, as well as patients and their families, whose help and participation made this work possible. This work was also supported by the Association for Frontotemporal Degeneration (L.P.) and the NINDS (R35NS097273 [L.P.], P01NS084974 [T.F.G. and L.P.], and P01NS099114 [T.F.G. and L.P.]).

## AUTHOR CONTRIBUTIONS

B.F.B., A.L.B., T.F.G., L.P., and H.R. contributed to the conception and/or design of the study. A.C.B., B.C.D., K.D.-R., D.R.G., N.G., N.R.G.-R., M.G.,

E.D.H., G.-Y.R.H., D.J.I., D.I.K., G.C.L., I.L., J.C.M., M.F.M., C.U.O., B.P., A.R., E.D.R., J.C.R., M.C.T., and Z.K.W. contributed through patient evaluations, collecting patient samples, and/or clinical data. L.K.F. and H.W.H. contributed to the study design and clinical data. T.F. contributed through protocol development and management and biospecimen collection. T.F.G. measured NfL concentrations, and A.R.B. assisted with sample processing. O.P. conducted patient evaluations and provided guidance on the selection of disease indicators. Statistical analyses were performed by M.G.H. and L.J.W. Literature review was undertaken by T.F.G. and A.M.V. The manuscript was written by T.F.G. and M.G.H. and was reviewed by all authors.

## DECLARATION OF INTERESTS

A.C.B. is site PI for the Alector INFRONT-3 trial. A.L.B. receives research support from NIH (R01AG038791, R01AG073482, and U24AG057437), Rainwater Charitable Foundation, Association for Frontotemporal Degeneration, Bluefield Project to Cure Frontotemporal Dementia, Alzheimer's Drug Discovery Foundation, and the Alzheimer's Association. He has served as a consultant for Alector, AGTC, Arkuda, Arvinas, AZTherapies, GSK, Oligomerix, Ono, Roche, Samumed, Stealth, Third Rock, Transposon, TrueBinding, and Wave and received research support from Biogen, Eisai, and Regeneron. B.F.B. has served as an investigator for clinical trials sponsored by Biogen, Alector, and EIP Pharma. He receives royalties from a published book entitled Behavioral Neurology of Dementia (Cambridge Medicine, 2009, 2017), serves on the Tau Consortium Scientific Advisory Board, and receives research support from the NIH. B.C.D. consults for Acadia, Arkuda, Axovant, Lilly, Biogen, Merck, Novartis, and Wave LifeSciences; has Elsevier editorial duties with payment (*Neuroimage: Clinical and Cortex*); and receives royalties from Oxford University Press and Cambridge University Press. K.D.-R. has research funding from Biogen and Lawson Health Research Institute and receives consultant fees from Biogen and educational fees from MedBridge. D.R.G. consults for Biogen, Fujirebio, and Amprion and is on the DSMB for Cognition Therapeutics. M.G. is participating in treatment trials sponsored by Alector, Prevail, and Passage Bio and is a consultant to Takeda, Passage Bio, and Biogen. N.G. has or is participating in clinical trials of anti-dementia drugs sponsored by Bristol Myers Squibb, Lilly/Avid Radiopharmaceuticals, Janssen, Novartis, Pfizer, and Wyeth. N.R.G.-R. has taken part in multicenter studies funded by Biogen, AbbVie, and Lilly. G.-Y.R.H. has received research support from Anavax, Biogen, and Roche. I.L. received support from Roche, Abbvie, Biogen, EIP-Pharma, and Biohaven Pharmaceuticals; was member of a Lundbeck Advisory Board; and receives salary from the University of California, San Diego and as Chief Editor of *Frontiers in Neurology*. J.C.M. participates on a speaker forum for Biogen and receives research support from Biogen, Eisai, Eli Lilly, Green Valley, and Novartis. C.U.O. is a consultant with Alector and Acadia and receives research funding from Alector. L.P. is a consultant for Expansion Therapeutics. E.D.R. receives funding from NIH, Alzheimer's Drug Discovery Foundation, Bluefield Project, and Alector; consults for Biogen, AVROBIO, and AGTC; and owns intellectual property related to tau. J.C.R. is a site PI for Eli Lilly and Eisai clinical trials and receives research support from NIH K23AG059888. M.C.T. participates in clinical trials with Biogen, Avanex, UCB, and Janssen. Z.K.W. is supported by the NIH/NIA and NIH/NINDS (1U19AG063911, FAIN: U19AG063911), Mayo Clinic Center for Regenerative Medicine, Mayo Clinic in Florida Focused Research Team Program, the gifts from The Sol Goldman Charitable Trust, the Donald G. and Jodi P. Heeringa Family, the Haworth Family Professorship in Neurodegenerative Diseases fund, and The Albertson Parkinson's Research Foundation. He serves as PI or co-PI on Biohaven Pharmaceuticals, Inc. (BHV4157-206 and BHV3241-301); Neuraly, Inc. (NLY01-PD-1); and Vigil Neuroscience, Inc. (VGL101-01.001) grants. He serves as co-PI of the Mayo Clinic APDA Center for Advanced Research and as an external advisory board member for Vigil Neuroscience, Inc. All other authors report no competing interests.

Received: September 11, 2021

Revised: December 13, 2021

Accepted: March 23, 2022

Published: April 19, 2022

### REFERENCES

- Greaves, C.V., and Rohrer, J.D. (2019). An update on genetic frontotemporal dementia. *J. Neurol.* 266, 2075–2086.
- Rosen, H.J., Boeve, B.F., and Boxer, A.L. (2020). Tracking disease progression in familial and sporadic frontotemporal lobar degeneration: recent findings from ARTFL and LEFFTDS. *Alzheimers Dement* 16, 71–78.
- Sjogren, M., Rosengren, L., Minthon, L., Davidsson, P., Blennow, K., and Wallin, A. (2000). Cytoskeleton proteins in CSF distinguish frontotemporal dementia from AD. *Neurology* 54, 1960–1964.
- Scherling, C.S., Hall, T., Berisha, F., Klepac, K., Karydas, A., Coppola, G., Kramer, J.H., Rabinovici, G., Ahljianian, M., Miller, B.L., et al. (2014). Cerebrospinal fluid neurofilament concentration reflects disease severity in frontotemporal degeneration. *Ann. Neurol.* 75, 116–126.
- Meeter, L.H., Dopfer, E.G., Jiskoot, L.C., Sanchez-Valle, R., Graff, C., Benussi, L., Ghidoni, R., Pijnenburg, Y.A., Borroni, B., Galimberti, D., et al. (2016). Neurofilament light chain: a biomarker for genetic frontotemporal dementia. *Ann. Clin. Transl. Neurol.* 3, 623–636.
- Alcolea, D., Vilaplana, E., Suarez-Calvet, M., Illan-Gala, I., Blesa, R., Clarimon, J., Llado, A., Sanchez-Valle, R., Molinuevo, J.L., Garcia-Ribas, G., et al. (2017). CSF sAPPbeta, YKL-40, and neurofilament light in frontotemporal lobar degeneration. *Neurology* 89, 178–188.
- Meeter, L.H.H., Vijverberg, E.G., Del Campo, M., Rozemuller, A.J.M., Donker Kaat, L., de Jong, F.J., van der Flier, W.M., Teunissen, C.E., van Swieten, J.C., and Pijnenburg, Y.A.L. (2018). Clinical value of neurofilament and phospho-tau/tau ratio in the frontotemporal dementia spectrum. *Neurology* 90, e1231–e1239.
- Olsson, B., Portelius, E., Cullen, N.C., Sandelius, A., Zetterberg, H., Andreasson, U., Hoglund, K., Irwin, D.J., Grossman, M., Weintraub, D., et al. (2019). Association of cerebrospinal fluid neurofilament light protein levels with cognition in patients with dementia, motor neuron disease, and movement disorders. *JAMA Neurol.* 76, 318–325.
- Delaby, C., Alcolea, D., Carmona-Iragui, M., Illan-Gala, I., Morenas-Rodriguez, E., Barroeta, I., Altuna, M., Estelles, T., Santos-Santos, M., Turon-Sans, J., et al. (2020). Differential levels of Neurofilament Light protein in cerebrospinal fluid in patients with a wide range of neurodegenerative disorders. *Sci. Rep.* 10, 9161.
- Abu-Rumeileh, S., Mometto, N., Bartoletti-Stella, A., Polisch, B., Oppi, F., Poda, R., Stanzani-Maserati, M., Cortelli, P., Liguori, R., Capellari, S., et al. (2018). Cerebrospinal fluid biomarkers in patients with frontotemporal dementia spectrum: a single-center study. *J. Alzheimers Dis.* 66, 551–563.
- Ljubenkov, P.A., Staffaroni, A.M., Rojas, J.C., Allen, I.E., Wang, P., Heuer, H., Karydas, A., Kornak, J., Cobigo, Y., Seeley, W.W., et al. (2018). Cerebrospinal fluid biomarkers predict frontotemporal dementia trajectory. *Ann. Clin. Transl. Neurol.* 5, 1250–1263.
- Rohrer, J.D., Woollacott, I.O., Dick, K.M., Brotherhood, E., Gordon, E., Fellows, A., Toombs, J., Drueyeh, R., Cardoso, M.J., Ourselin, S., et al. (2016). Serum neurofilament light chain protein is a measure of disease intensity in frontotemporal dementia. *Neurology* 87, 1329–1336.
- Wilke, C., Preische, O., Deuschle, C., Roeben, B., Apel, A., Barro, C., Maia, L., Maetzler, W., Kuhle, J., and Synofzik, M. (2016). Neurofilament light chain in FTD is elevated not only in cerebrospinal fluid, but also in serum. *J. Neurol. Neurosurg. Psychiatry* 87, 1270–1272.
- Steinacker, P., Anderl-Straub, S., Diehl-Schmid, J., Semler, E., Uttner, I., von Arnim, C.A.F., Barthel, H., Danek, A., Fassbender, K., Fliessbach, K., et al. (2018). Serum neurofilament light chain in behavioral variant frontotemporal dementia. *Neurology* 91, e1390–e1401.
- Matias-Guiu, J.A., Gomez-Pinedo, U., Forero, L., Pytel, V., Cano, F., Moreno-Ramos, T., Cabrera-Martin, M.N., Matias-Guiu, J., and Gonzalez-Rosa, J.J. (2019). Plasma neurofilament light chain in primary progressive aphasia and related disorders: clinical significance and metabolic correlates. *J. Alzheimers Dis.* 72, 773–782.
- Katisko, K., Cajanus, A., Jaaskelainen, O., Kontkanen, A., Hartikainen, P., Korhonen, V.E., Helisalmi, S., Haapasalo, A., Koivumaa-Honkanen, H., Herukka, S.K., et al. (2020). Serum neurofilament light chain is a discriminative biomarker between frontotemporal lobar degeneration and primary psychiatric disorders. *J. Neurol.* 267, 162–167.
- Cajanus, A., Katisko, K., Kontkanen, A., Jaaskelainen, O., Hartikainen, P., Haapasalo, A., Herukka, S.K., Vanninen, R., Solje, E., Hall, A., et al. (2020). Serum neurofilament light chain in FTLT: association with C9orf72, clinical phenotype, and prognosis. *Ann. Clin. Transl. Neurol.* 7, 903–910.
- Steinacker, P., Semler, E., Anderl-Straub, S., Diehl-Schmid, J., Schroeter, M.L., Uttner, I., Foerstl, H., Landwehrmeyer, B., von Arnim, C.A., Kassubek, J., et al. (2017). Neurofilament as a blood marker for diagnosis and monitoring of primary progressive aphasia. *Neurology* 88, 961–969.
- Heller, C., Chan, E., Foiani, M.S., Todd, E., Russell, L.L., Greaves, C.V., Heslegrave, A.J., Warren, J.D., Zetterberg, H., Bocchetta, M., et al. (2020). Plasma glial fibrillary acidic protein and neurofilament light chain are measures of disease severity in semantic variant primary progressive aphasia. *J. Neurol. Neurosurg. Psychiatry*, 2020. <https://doi.org/10.1136/jnnp-2020-325085>.
- van der Ende, E.L., Meeter, L.H., Poos, J.M., Panman, J.L., Jiskoot, L.C., Dopfer, E.G.P., Papma, J.M., de Jong, F.J., Verberk, I.M.W., Teunissen, C., et al. (2019). Serum neurofilament light chain in genetic frontotemporal dementia: a longitudinal, multicentre cohort study. *Lancet Neurol.* 18, 1103–1111.
- Rojas, J.C., Karydas, A., Bang, J., Tsai, R.M., Blennow, K., Liman, V., Kramer, J.H., Rosen, H., Miller, B.L., Zetterberg, H., et al. (2016). Plasma neurofilament light chain predicts progression in progressive supranuclear palsy. *Ann. Clin. Transl. Neurol.* 3, 216–225.
- Donker Kaat, L., Meeter, L.H., Chiu, W.Z., Melhem, S., Boon, A.J.W., Blennow, K., Zetterberg, H., and van Swieten, J.C. (2018). Serum neurofilament light chain in progressive supranuclear palsy. *Parkinsonism Relat. Disord.* 56, 98–101.
- Hansson, O., Janelidze, S., Hall, S., Magdalinou, N., Lees, A.J., Andreasson, U., Norgren, N., Linder, J., Forsgren, L., Constantinescu, R., et al. (2017). Blood-based NfL: a biomarker for differential diagnosis of parkinsonian disorder. *Neurology* 88, 930–937.
- Rojas, J.C., Wang, P., Staffaroni, A.M., Heller, C., Cobigo, Y., Wolf, A., Goh, S.M., Ljubenkov, P.A., Heuer, H.W., Fong, J.C., et al. (2021). Plasma neurofilament light for prediction of disease progression in familial frontotemporal lobar degeneration. *Neurology* 96, e2296–e2312.
- Saracino, D., Dorgham, K., Camuzat, A., Rinaldi, D., Rametti-Lacroux, A., Houot, M., Clot, F., Martin-Hardy, P., Jomea, L., Azuar, C., et al. (2021). Plasma NfL levels and longitudinal change rates in C9orf72 and GRN-associated diseases: from tailored references to clinical applications. *J. Neurol. Neurosurg. Psychiatry* 92, 1278–1288.
- Wilke, C., Reich, S., van Swieten, J.C., Borroni, B., Sanchez-Valle, R., Moreno, F., Laforce, R., Graff, C., Galimberti, D., Rowe, J.B., et al. (2021). Stratifying the presymptomatic phase of genetic frontotemporal dementia by serum NfL and pNfH: a longitudinal multicentre study. *Ann Neurol.* 91, 33–47.
- Miyagawa, T., Brushaber, D., Syrjanen, J., Kremers, W., Fields, J., Forsberg, L.K., Heuer, H.W., Knopman, D., Kornak, J., Boxer, A., et al. (2020). Utility of the global CDR(R) plus NACC FTLT rating and development of scoring rules: data from the ARTFL/LEFFTDS Consortium. *Alzheimers Dement* 16, 106–117.
- Besser, L.M., and Galvin, J.E. (2020). Diagnostic experience reported by caregivers of patients with frontotemporal degeneration. *Neurol. Clin. Pract.* 10, 298–306.
- Boxer, A.L., Gold, M., Feldman, H., Boeve, B.F., Dickinson, S.L., Fillit, H., Ho, C., Paul, R., Pearlman, R., Sutherland, M., et al. (2020). New directions in clinical trials for frontotemporal lobar degeneration: methods and outcome measures. *Alzheimers Dement* 16, 131–143.
- Albert, M.S., DeKosky, S.T., Dickson, D., Dubois, B., Feldman, H.H., Fox, N.C., Gamst, A., Holtzman, D.M., Jagust, W.J., Petersen, R.C., et al. (2011). The diagnosis of mild cognitive impairment due to

Alzheimer's disease: recommendations from the National Institute on Aging-Alzheimer's Association workgroups on diagnostic guidelines for Alzheimer's disease. *Alzheimers Dement* 7, 270–279.

31. Coleman, K.K., Coleman, B.L., MacKinley, J.D., Pasternak, S.H., and Finger, E.C. (2016). Detection and differentiation of frontotemporal dementia and related disorders from alzheimer disease using the montreal cognitive assessment. *Alzheimer Dis. Assoc. Disord.* 30, 258–263.
32. Rankin, K. (2008). Social Norms Questionnaire. Domain Specific Tasks of Executive Function (NINDS).
33. Weintraub, S., Mesulam, M.M., Wieneke, C., Rademaker, A., Rogalski, E.J., and Thompson, C.K. (2009). The northwestern anagram test: measuring sentence production in primary progressive aphasia. *Am. J. Alzheimers Dis. Other Dement.* 24, 408–416.
34. Gollan, T.H., Weissberger, G.H., Runnqvist, E., Montoya, R.I., and Cera, C.M. (2012). Self-ratings of spoken language dominance: a multi-lingual naming test (MINT) and preliminary Norms for young and aging Spanish-English bilinguals. *Biling (Camb Engl)* 15, 594–615.
35. Grossman, M. (2012). The non-fluent/agrammatic variant of primary progressive aphasia. *Lancet Neurol.* 11, 545–555.
36. Llinas-Regla, J., Vilalta-Franch, J., Lopez-Pousa, S., Calvo-Perxas, L., Torrents Rodas, D., and Garre-Olmo, J. (2017). The Trail making test. *Assessment* 24, 183–196.

## STAR★METHODS

### KEY RESOURCES TABLE

| REAGENT or RESOURCE             | SOURCE                                                                                                                                                                        | IDENTIFIER |
|---------------------------------|-------------------------------------------------------------------------------------------------------------------------------------------------------------------------------|------------|
| Biological samples              |                                                                                                                                                                               |            |
| Human plasma                    | ALLFTD (ARTFL-LEFFTDS Longitudinal Frontotemporal Lobar Degeneration: a multisite research consortium). <a href="https://www.allftd.org/data">https://www.allftd.org/data</a> |            |
| Critical commercial assays      |                                                                                                                                                                               |            |
| NF-light™                       | Quanterix                                                                                                                                                                     | Cat#103186 |
| Other                           |                                                                                                                                                                               |            |
| Simoa HD-1 Analyzer® instrument | Quanterix                                                                                                                                                                     |            |

### RESOURCE AVAILABILITY

#### Lead contact

Further information and requests for resources and reagents should be directed to the lead contact, Tania Gendron ([Gendron.tania@mayo.edu](mailto:Gendron.tania@mayo.edu)).

#### Materials availability

This study did not generate new unique reagents.

#### Data and code availability

- De-identified human/patient clinical, demographic and plasma NfL data are available from ALLFTD upon request. Investigators are required to complete the Request Clinical Data form on the request portal (<https://www.allftd.org/data>) and to review the data sharing and publication policy. Data that could identify a participant are not provided. Data requests are reviewed quarterly and generally fulfilled approximately four weeks after they are approved depending on the complexity of the request.
- This paper does not report original code.
- Any additional information required to reanalyze the data reported in this paper is available from the [lead contact](#) and ALLFTD.

### EXPERIMENTAL MODEL AND SUBJECT DETAILS

#### Protocol approvals and patient consents

Study participants were recruited through two North American multicenter observational studies: Longitudinal Evaluation of Familial Frontotemporal Dementia Subjects (LEFFTDS; [ClinicalTrials.gov](https://clinicaltrials.gov/ct2/show/study/NCT02372773) NCT02372773) and Advancing Research and Treatment in Frontotemporal Lobar Degeneration (ARTFL; [ClinicalTrials.gov](https://clinicaltrials.gov/ct2/show/study/NCT02365922) NCT02365922). Participants or their caregivers provided written informed consent. For each participating center, study procedures were approved by their local Institutional Review Board committee.

#### Human subject characteristics

Human subject characteristics are provided in [Table 1](#), and include data on gender, age at symptom onset, age at baseline plasma collection, age from symptom onset to baseline plasma collection and mutation status for each diagnostic group. Clinically defined phenotypes of the 981 participants are comprised of 144 clinically normal, mutation-free individuals who were in kindreds with known FTD-related gene mutations, 85 clinically normal individuals with an FTD-causing mutation (referred to as presymptomatic mutation carriers), 289 patients with bvFTD, 72 with nfvPPA, 84 with svPPA, 89 with CBS, 124 with PSP-RS, 25 with FTD/ALS, 12 with ALS and 57 with MCI [either mild cognitive impairment (MCI-cog, n = 38) or mild behavioral changes (MCI-beh, n = 19)]. Individuals in these phenotype groups were classified as previously reported based on widely accepted published criteria for each disorder.<sup>27</sup> Mildly symptomatic participants who experienced a cognitive change compared with their previous level of functioning, had mild impairment in one or more domains of cognition on neuropsychological assessment but were still independent in functional abilities, and did not meet the criteria for dementia<sup>30</sup> were classified as MCI-cog. MCI-beh was applied to participants exhibiting behavior/compartment/personality changes but not having dementia nor meeting criteria for probable bvFTD.



### **Clinical procedures**

Study participants underwent annual standardized evaluations that included neurologic assessment, caregiver or companion interview and neuropsychological testing. Clinical scales included CDR + NACC-FTLD global and sum of boxes scores, which provide global measures of clinical severity,<sup>27</sup> and the MoCA, a 30-point cognitive screening tool assessing visuospatial, semantic, phonemic and fluent language, working memory, recall, attention, and orientation.<sup>31</sup> The following neuropsychological tests were also included:

#### **Social Norms Questionnaire (SNQ)**

This test evaluates the participant's ability to identify appropriate and inappropriate behaviors in several hypothetical scenarios.<sup>32</sup>

#### **Northwestern Anagram Test (NAT)**

Participants must organize words to create 10 grammatically correct sentences that describe a picture stimulus. This test, believed to detect grammatic impairments, allows sentence production to be assessed independently of speech production, word-finding difficulties, or working memory capacity.<sup>33</sup>

#### **The Multilingual Naming Test (MINT)**

This is a 32-item object picture naming task. The total score includes items named correctly with semantic, but not phonemic, cues.<sup>34</sup>

#### **Verbal fluency phonemic test**

In two separate 60 s trials, participants must generate as many words as possible that begin with the letter "F" or "L". The outcome is the total correct words summed across both trials.<sup>35</sup>

#### **Verbal semantic/category test**

In two separate 60 s trials, participants must generate as many words as possible that belong to the categories "animals" or "vegetables". The outcome is the total correct words summed across both trials.

#### **Digit span forward and backward**

Participants are read a sequence of numbers that become increasingly longer, and must repeat the same sequence back to the examiner in order (forward span) or in reverse order (backward span).

#### **Trail Making Test Part B**

This test of executive function consists of 24 circles on a piece of paper; half of the circles have the numbers 1–12 in them, and half have the letters A–L. The participant has to draw a line from one circle to the next in ascending order alternating between circles with numbers and circles with letters (i.e., 1-A-2-B-3-C-4-D-5-E ...).<sup>36</sup>

A breakdown of test scores by group is provided in [Table S10](#).

## **METHOD DETAILS**

### **Plasma neurofilament concentration determination**

Participant blood samples were collected in ethylene diamine tetra-acetic acid tubes, centrifuged at 1,500 g at 4°C for 15 min, and the resulting plasma was aliquoted and stored at –80°C at NCRAD. Aliquots were shipped to the Mayo Clinic in Jacksonville, FL. All samples were assayed on the same instrument and by the same person in a blinded fashion. NfL concentrations in plasma were measured with the NF-Light digital immunoassay (Quanterix, Cat#103186, Lot 501992) using the HD-X Analyzer per the manufacturer's protocol. In brief, samples were thawed on ice, mixed thoroughly by low-speed vortexing and centrifuged at 10,000 g for 5 min before transferring samples to 96-well plates. Samples were diluted 1:4 by the instrument and tested in duplicate. In addition to participant plasma samples, each run included 8 calibrators and 2 quality control samples provided with the kits, as well as a pooled reference sample provided by NCRAD. When the concentration of NfL in a sample exceeded the upper limit of the calibration curve, it was retested after first diluting it 1:4 or 1:8 at the bench, followed by an onboard 1:4 dilution. Concentrations were interpolated from the standard curve using a 4-parameter logistic curve fit (1/y2 weighted).

The mean %CV of duplicate NfL measurements was 4.39%. Across 15 runs, the mean concentration of the first quality control sample was 4.01 pg/ml and the inter-assay %CV was 8.16%, the mean concentration of the second quality control sample was 150.18 pg/ml and the inter-assay %CV was 5.17%, and the mean concentration of the reference sample was 15.25 pg/ml and the inter-assay %CV was 7.56%.

Among the samples we tested, NfL concentrations for 155 samples had previously been determined at Quanterix using their NF-Light digital immunoassay assayed on an HD-1 Analyzer.<sup>24</sup> The mean inter-site %CV of NfL concentrations was 14.37%, with NfL concentrations from each group showing a near perfect correlation (Pearson's  $r = 0.99$ ,  $p < 0.0001$ ).

## **QUANTIFICATION AND STATISTICAL ANALYSIS**

In all statistical association analyses, the baseline NfL concentration was examined on the base 2 logarithm scale due to its skewed distribution. All covariates that were adjusted for in multivariable regression models were pre-defined. Unstandardized  $\beta$  coefficients and 95% CIs were estimated. The number of subjects ( $n$ ) in each group for a given statistical analysis is reported in the appropriate corresponding tables and figures. All statistical tests were two-sided and performed using SAS (version 9.4; SAS Institute, Inc., Cary, North Carolina).

## Associations of plasma NfL with age, gender and symptom duration

Separately for each phenotype group, associations of baseline NfL with age, gender and symptom duration (the latter for analysis of patients only) were assessed using linear regression models that were adjusted for the pre-defined covariates of age, gender and symptom duration (Figures 1A–1C and S1A–S1C, Table S2). After applying a Bonferroni correction for multiple testing,  $p < 0.025$  (controls and presymptomatic mutation carriers) or  $p < 0.0167$  (symptomatic groups) were considered as statistically significant.

## Comparisons of baseline NfL concentrations among phenotype groups

Comparisons of baseline NfL concentrations between controls and nine separate groups as well as between presymptomatic mutation carriers and eight separate groups, and when stratifying by symptom duration, were made using linear regression models (Figures 2A and S1D, Tables S3 and S4). Unadjusted models were first examined, followed by multivariable models that were adjusted for age and gender.  $\beta$  coefficients and 95% CIs were estimated and are interpreted as the difference in mean NfL concentration (on the base 2 logarithm scale) between the two groups of interest.  $p < 0.0056$  (comparisons between controls and other groups) or  $p < 0.0063$  (comparisons between presymptomatic mutation carriers and other groups) were considered as significant after utilizing a Bonferroni correction for multiple comparisons.

Comparisons of baseline NfL concentrations between controls and presymptomatic mutation carriers who did or did not phenocconvert after baseline, and between phenoconverters and non-converters, were made using linear regression models that were adjusted for age and gender (Figures 2B and S1E, Table S5).

Comparisons of baseline NfL between controls or presymptomatic mutation carriers and five separate groups of patients with a CDR + NACC-FTLD global score of 0 (CBS,  $n = 2$ ; PSP-RS,  $n = 1$ ) or 0.5 ( $n = 106$ ) were made using linear regression models. Unadjusted models were first examined, followed by multivariable models that were adjusted for age and gender (Table S6).  $\beta$  coefficients and 95% CIs were estimated and are interpreted as the difference in mean NfL concentration (on the base 2 logarithm scale) between the two groups of interest.  $p < 0.01$  was considered as significant after applying a Bonferroni correction for multiple comparisons.

Comparisons of baseline NfL among eight symptomatic groups (Figures 2A and S1D, Table S7) were made using linear regression models that were adjusted for age, gender and symptom duration.  $p < 0.0018$  was considered as significant after utilizing a Bonferroni correction for multiple comparisons.

## Comparisons of baseline NfL concentrations according to mutation status

Comparisons of baseline NfL among individuals with no mutation and individuals with a mutation in either *C9orf72*, *GRN* or *MAPT* were analyzed for three phenotype groups (clinically normal, bvFTD or MCI) using linear regression models that were adjusted for age, gender and symptom duration (the latter for analysis of patients only) (Figure 2E, Tables S8 and S9).  $p < 0.0083$  (six pair-wise comparisons for clinically normal individuals), or  $p < 0.0071$  (seven pair-wise comparisons bvFTD patients) were considered as significant after utilizing a Bonferroni correction for multiple comparisons.

## Determination of rates of change in NfL concentrations and in indicators of disease severity

For subjects with longitudinal NfL measurements and for whom the first and last measurements were at least 1 year apart, we estimated the rate of change in NfL per year, separately for each individual, by extracting the  $\beta$  coefficient from a linear regression model where NfL was the dependent variable and time since initial NfL measure was the independent variable (a logarithm transformation of NfL was not utilized in this part of the analysis). All available NfL measures for a given subject were utilized in these linear regression models. This same strategy was utilized to calculate rate of change in disease indicators per year.

## Determination of the discriminatory power of baseline NfL

To assess the ability of baseline NfL to discriminate between controls or presymptomatic mutation carriers and other phenotype groups (Figure 2D, Tables S3, S4, and S6), we estimated area under the ROC curve (AUC) values along with 95% CIs. An AUC equal to 1.0 indicates perfect predictive ability for a given model, whereas an AUC equal to 0.5 represents predictive ability equal to chance. Unadjusted AUCs were initially estimated, however as age and gender differed between comparison groups and were also associated with baseline NfL concentrations, these AUC estimates are influenced by age and gender and are therefore biased. Therefore, we calculated age/gender-adjusted AUC estimates for subjects involved in a given comparison by first extracting the residuals from a linear regression model where baseline NfL is the dependent variable and both age and gender and independent variables, thereby essentially normalizing by age and gender. We then compared these model residuals between the two groups of interest to estimate AUC for a given pairwise comparison in our adjusted analyses.

We used the same strategy as above to test the ability of baseline NfL level and rate of change in NfL level per year to discriminate presymptomatic mutation carriers who phenocconverted after baseline from those who did not convert and controls. To assess whether utilizing both rate of change in NfL over time and baseline NfL to differentiate converters from non-converters resulted in improved predictive ability when compared to examining the individual measures themselves, we estimated the increase in AUC that was observed when comparing the following two logistic regression models, where the outcome was converter/non-converter status, and only subjects with a measure for rate of change in NfL over time were included: (1) covariates of age, gender and baseline NfL level, and (2) covariates of age, gender, baseline NfL level and rate of change in NfL level over time.

### Associations of baseline plasma NfL with indicators of disease severity

Associations of baseline NfL with baseline disease indicators (Tables 2 and S11) and with rate of change over time (per year) in disease indicators (Table S12) were examined using linear regression models. Unadjusted and multivariable models were evaluated, where multivariable models were adjusted for age, gender, symptom duration and years of education.  $\beta$  coefficients and 95% CIs were estimated and are interpreted as the change in the mean outcome measure for each doubling in NfL concentration.  $p < 0.005$  was considered as significant after utilizing a Bonferroni adjustment for multiple testing separately for each phenotype group. Disease severity characteristics according to phenotype group are shown in Table S10.

### Comparisons of rate of change in NfL concentrations between controls or presymptomatic mutation carriers and other phenotype groups and by mutation status

We compared rate of change in NfL concentrations per year vs. controls for different phenotype groups using linear regression models that were adjusted for age and gender, where  $p < 0.0039$  was considered as significant after applying a Bonferroni correction for multiple testing (Table S13).  $\beta$  coefficients and 95% confidence CIs were estimated and are interpreted as the difference in the mean rate of change in NfL level per year between the given two groups. Additionally, rate of change in NfL level per year was compared among presymptomatic non-converters and phenoconverters as well as phenotype groups using linear regression models that were adjusted for age, gender and, for comparisons among patient groups, symptom duration.  $p < 0.0033$  were considered as statistically significant after applying a Bonferroni correction for multiple comparisons (Table S14). Finally, rate of change in NfL level per year was compared according to mutation status among presymptomatic mutation carriers using linear regression models that were adjusted for age and gender.  $p < 0.0167$  was considered as statistically significant after utilizing a Bonferroni correction for multiple testing (Table S15).

### ADDITIONAL RESOURCES

Participants were enrolled through the Longitudinal Evaluation of Familial Frontotemporal Dementia Subjects study (ClinicalTrials.gov NCT02372773) and the Advancing Research and Treatment in Frontotemporal Lobar Degeneration study (ClinicalTrials.gov NCT02365922).

**Supplemental information**

**Comprehensive cross-sectional and  
longitudinal analyses of plasma neurofilament  
light across FTD spectrum disorders**

**Tania F. Gendron, Michael G. Heckman, Launia J. White, Austin M. Veire, Otto Pedraza, Alexander R. Burch, Andrea C. Bozoki, Bradford C. Dickerson, Kimiko Domoto-Reilly, Tatiana Foroud, Leah K. Forsberg, Douglas R. Galasko, Nupur Ghoshal, Neill R. Graff-Radford, Murray Grossman, Hilary W. Heuer, Edward D. Huey, Ging-Yuek R. Hsiung, David J. Irwin, Daniel I. Kaufer, Gabriel C. Leger, Irene Litvan, Joseph C. Masdeu, Mario F. Mendez, Chiadi U. Onyike, Belen Pascual, Aaron Ritter, Erik D. Roberson, Julio C. Rojas, Maria Carmela Tartaglia, Zbigniew K. Wszolek, Howard Rosen, Bradley F. Boeve, Adam L. Boxer, ALLFTD consortium, and Leonard Petrucelli**

## **Supplemental information**

### **Comprehensive cross-sectional and longitudinal analyses of plasma neurofilament light across FTD spectrum disorders**

#### **Authors**

Tania F. Gendron, Michael G. Heckman, Launia White, Austin M. Veire, Otto Pedraza, Alexander R. Burch, Andrea C. Bozoki, Bradford C. Dickerson, Kimiko Domoto-Reilly, Tatiana Foroud, Leah K. Forsberg, Douglas R. Galasko, Nupur Ghoshal, Neill R. Graff-Radford, Murray Grossman, Hilary W. Heuer, Edward D. Huey, Ging-Yuek R. Hsiung, David J. Irwin, Daniel I. Kaufer, Gabriel C. Leger, Irene Litvan, Joseph C. Masdeu, Mario F. Mendez, Chiadi U. Onyike, Belen Pascual, Aaron Ritter, Erik D. Roberson, Julio C. Rojas, Maria Carmela Tartaglia, Zbigniew K. Wszolek, Howard Rosen, Bradley F. Boeve, Adam L. Boxer, Leonard Petrucelli, and the ALLFTD Consortium

Supplemental figure

**A**

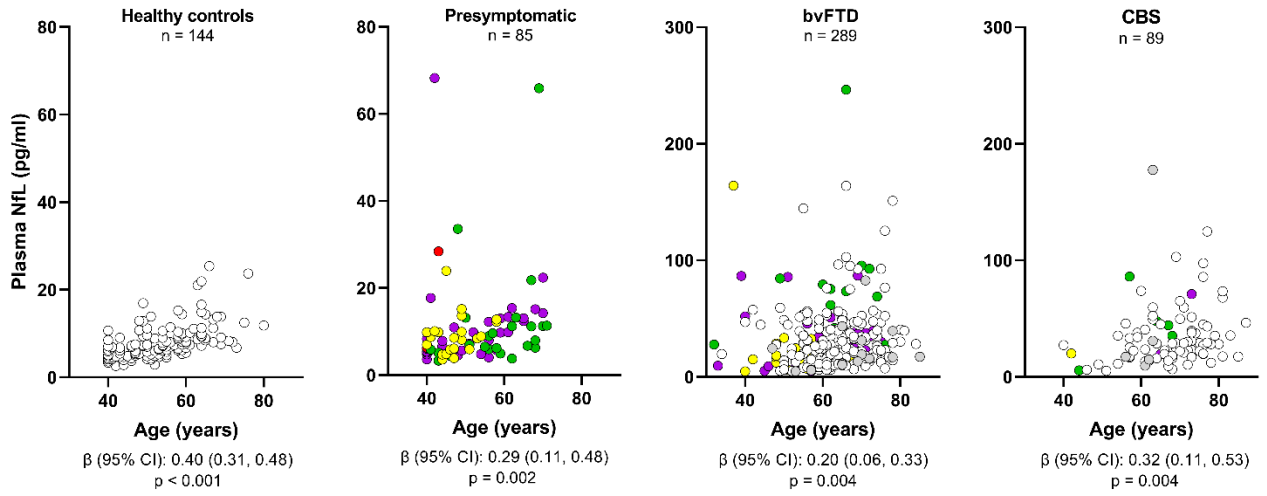

**B**

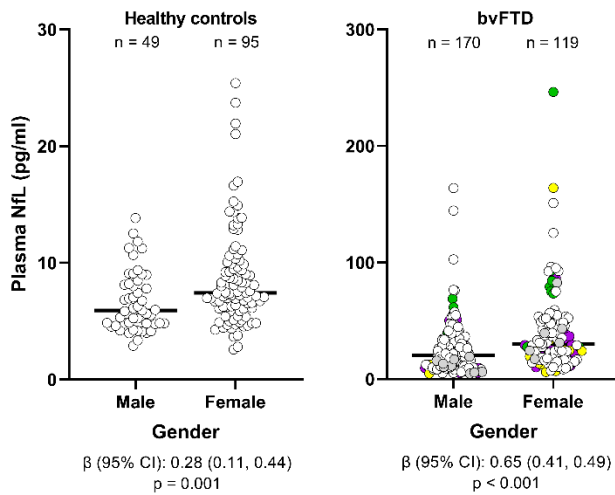

**C**

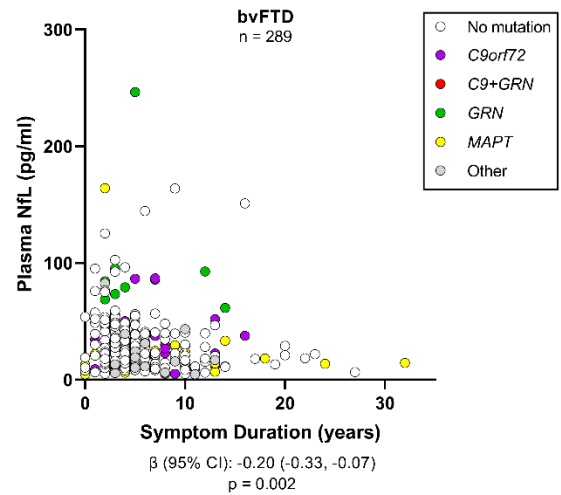

**D**

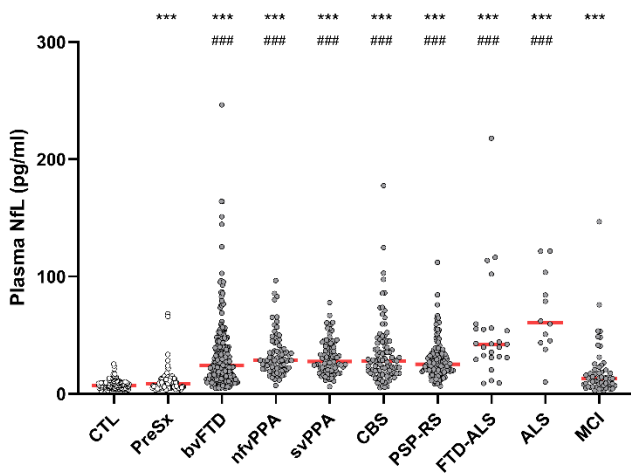

**E**

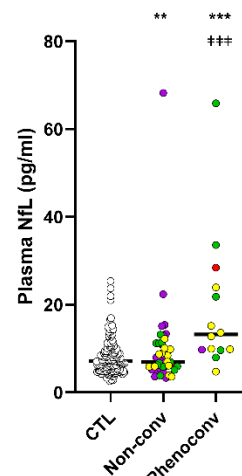

**Figure S1. Plasma NfL associates with age, gender and symptom duration in some phenotype groups, and is elevated in presymptomatic mutation carriers and symptomatic groups, Related to Figures 2A and 2B, and to Tables S3–S5 and S7.** (A-C) Associations of baseline NfL concentrations (the mean of duplicate measures) with age (A), gender (B) and symptom duration (C) were assessed using linear regression models adjusted for age, gender and symptom duration.  $\beta$  coefficients ( $\beta$ ), 95% confidence intervals (95% CI) and p values are shown for significant associations. Grey circles represent 11 bvFTD patients and five CBS patients with unknown mutation status, one bvFTD patient with a likely pathogenic *GRN* variant and three with a *TARDBP* mutation, and one CBS patient with an intermediate *C9orf72* repeat expansion. See **Figure 1** to view NfL concentrations on the base 10 logarithm scale and see **Table S2**. (D, E) Comparison of baseline plasma NfL between healthy controls or presymptomatic mutation carriers and symptomatic groups (D), and between presymptomatic carriers who phenoconverted to controls or to presymptomatic carriers who remained asymptomatic for at least one year (E). p values are from analysis adjusted for age and gender. \*\*\*p < 0.001 and \*\*p < 0.01, comparison to controls; ###p < 0.001 comparison to presymptomatic carriers; #p < 0.001, comparison to presymptomatic non-converters. Horizontal bars represent median NfL concentrations. See Figures 2A and 2B to view NfL concentrations on the base 10 logarithm scale, and see Tables S3–S5, S7.

## Supplemental tables

**Table S1: Breakdown of baseline and longitudinal plasma NfL measures and rates of NfL change in phenotype groups, Related to Table 1**

| Phenotype group                        | Number of individuals with baseline plasma NfL | Number of individuals with longitudinal plasma samples | Number of individuals for whom rates of NfL change could be calculated <sup>4</sup> |
|----------------------------------------|------------------------------------------------|--------------------------------------------------------|-------------------------------------------------------------------------------------|
| Controls                               | 144                                            | 79                                                     | 69                                                                                  |
| All presymptomatic mutation carriers   | 85                                             | 58                                                     | 52                                                                                  |
| Non-converters <sup>1</sup>            | 43                                             | 35                                                     | 35                                                                                  |
| Phenoconverters <sup>2</sup>           | 14                                             | 14                                                     | 14                                                                                  |
| Unknown conversion status <sup>3</sup> | 28                                             | 9                                                      | 3                                                                                   |
| bvFTD                                  | 289                                            | 39                                                     | 35                                                                                  |
| nfvPPA                                 | 72                                             | 10                                                     | 7                                                                                   |
| svPPA                                  | 84                                             | 2                                                      | 2                                                                                   |
| CBS                                    | 89                                             | 14                                                     | 6                                                                                   |
| PSP-RS                                 | 124                                            | 10                                                     | 3                                                                                   |
| MCI                                    | 57                                             | 18                                                     | 18                                                                                  |

<sup>1</sup>Non-converters were presymptomatic at baseline and known to have remained asymptomatic for at least one year from baseline. <sup>2</sup>Phenoconverters were presymptomatic at baseline but subsequently diagnosed as symptomatic at a later visit. Presymptomatic phenoconverters were comprised of one individual with a *C9orf72* mutation who developed MCI, one with both a *C9orf72* and *GRN* mutation diagnosed with nfvPPA at follow-up, five with a *GRN* mutation and seven with a *MAPT* mutation. All *GRN* mutation carriers phenoconverted to MCI with two patients subsequently developing bvFTD. Four *MAPT* mutation carriers were later diagnosed with MCI, two with bvFTD and one with Parkinson's disease. <sup>3</sup>The 28 presymptomatic individuals with an unknown conversion status had insufficient follow-up data to be categorized as a non-converter or a phenoconverter. <sup>4</sup>Rates of NfL change per year were calculated only for individuals with one or more NfL measurements at least one year from the baseline NfL measurement. See also Table 1.



**Table S2: Associations of baseline NfL with age, gender and symptom duration in phenotype groups, Related to Figures 1A–C and Figures S1A–C**

| Phenotype group/association                             | $\beta$ (95% CI)     | p value          |
|---------------------------------------------------------|----------------------|------------------|
| Controls (n = 144)                                      |                      |                  |
| Association with age (per 10 year increase)             | 0.40 (0.31, 0.48)    | <b>&lt;0.001</b> |
| Association with gender (males vs. females)             | 0.28 (0.11, 0.44)    | <b>0.001</b>     |
| Presymptomatic mutation carriers (n = 85)               |                      |                  |
| Association with age (per 10 year increase)             | 0.29 (0.11, 0.48)    | <b>0.002</b>     |
| Association with gender (males vs. females)             | 0.32 (-0.03, 0.67)   | 0.073            |
| bvFTD patients (n = 289)                                |                      |                  |
| Association with age (per 10 year increase)             | 0.20 (0.06, 0.33)    | <b>0.004</b>     |
| Association with gender (males vs. females)             | 0.65 (0.41, 0.89)    | <b>&lt;0.001</b> |
| Association with symptom duration (per 5 year increase) | -0.20 (-0.33, -0.07) | <b>0.002</b>     |
| nfvPPA patients (n = 71)                                |                      |                  |
| Association with age (per 10 year increase)             | 0.03 (-0.19, 0.25)   | 0.78             |
| Association with gender (males vs. females)             | 0.38 (0.02, 0.74)    | 0.038            |
| Association with symptom duration (per 5 year increase) | -0.18 (-0.56, 0.21)  | 0.36             |
| svPPA patients (n = 84)                                 |                      |                  |
| Association with age (per 10 year increase)             | 0.22 (0.00, 0.43)    | 0.048            |
| Association with gender (males vs. females)             | 0.14 (-0.16, 0.43)   | 0.36             |
| Association with symptom duration (per 5 year increase) | -0.15 (-0.33, 0.02)  | 0.086            |
| CBS patients (n = 89)                                   |                      |                  |
| Association with age (per 10 year increase)             | 0.32 (0.11, 0.53)    | <b>0.004</b>     |
| Association with gender (males vs. females)             | 0.10 (-0.31, 0.52)   | 0.62             |
| Association with symptom duration (per 5 year increase) | 0.07 (-0.15, 0.29)   | 0.51             |
| PSP-RS patients (n = 124)                               |                      |                  |
| Association with age (per 10 year increase)             | 0.03 (-0.16, 0.23)   | 0.75             |
| Association with gender (males vs. females)             | 0.27 (0.00, 0.54)    | 0.049            |
| Association with symptom duration (per 5 year increase) | -0.05 (-0.25, 0.16)  | 0.65             |
| FTD/ALS patients (n = 23)                               |                      |                  |
| Association with age (per 10 year increase)             | 0.11 (-0.39, 0.61)   | 0.65             |
| Association with gender (males vs. females)             | 0.35 (-0.42, 1.13)   | 0.35             |
| Association with symptom duration (per 5 year increase) | -0.54 (-1.08, 0.01)  | 0.053            |
| ALS patients (n = 12)                                   |                      |                  |
| Association with age (per 10 year increase)             | 0.11 (-1.12, 1.33)   | 0.85             |
| Association with gender (males vs. females)             | -0.88 (-2.46, 0.70)  | 0.24             |
| Association with symptom duration (per 5 year increase) | -0.51 (-1.91, 0.88)  | 0.42             |
| MCI patients (n = 55)                                   |                      |                  |
| Association with age (per 10 year increase)             | 0.33 (0.07, 0.59)    | <b>0.013</b>     |
| Association with gender (males vs. females)             | 0.30 (-0.28, 0.88)   | 0.30             |
| Association with symptom duration (per 5 year increase) | -0.01 (-0.15, 0.14)  | 0.94             |

$\beta$ =regression coefficient; CI=confidence interval.  $\beta$  values, 95% CIs, and p values result from linear regression models that were adjusted for age, gender and symptom duration (only in patients).  $\beta$  values are interpreted as the change in mean NfL concentration (on the base-2 logarithm scale) corresponding to the increase given in parenthesis (for age and symptom duration) or for females in comparison to males (for gender). p values < 0.025 (controls and presymptomatic mutation carriers) or p values <0.0167 (all symptomatic groups) are considered statistically significant after correcting for multiple testing. See also Figures 1A–C and Figures S1A–C.

**Table S3: Comparisons of baseline NfL concentrations between controls or presymptomatic mutation carriers and phenotype groups, Related to Figures 2A, 2D and S1D**

| Phenotype group | n   | Median (min, max)<br>NfL concentration<br>(pg/ml) | Unadjusted analysis |         | Adjusting for age and gender |         | AUC (95% CI)        |                              |
|-----------------|-----|---------------------------------------------------|---------------------|---------|------------------------------|---------|---------------------|------------------------------|
|                 |     |                                                   | $\beta$ (95% CI)    | p value | $\beta$ (95% CI)             | p value | Unadjusted analysis | Adjusting for age and gender |
| Controls        | 144 | 7.1 (2.6, 25.4)                                   | 0.00 (reference)    | N/A     | 0.00 (reference)             | N/A     | N/A                 | N/A                          |
| Presymptomatic  | 85  | 8.3 (3.3, 68.2)                                   | 0.25 (0.06, 0.45)   | 0.010   | 0.35 (0.18, 0.52)            | <0.001  | 0.58 (0.50, 0.66)   | 0.64 (0.56, 0.72)            |
| bvFTD           | 289 | 24.2 (4.7, 246.4)                                 | 1.71 (1.52, 1.90)   | <0.001  | 1.64 (1.43, 1.84)            | <0.001  | 0.92 (0.89, 0.94)   | 0.85 (0.82, 0.88)            |
| nfvPPA          | 72  | 28.7 (7.1, 96.5)                                  | 2.05 (1.86, 2.24)   | <0.001  | 1.64 (1.42, 1.85)            | <0.001  | 0.98 (0.96, 1.00)   | 0.87 (0.82, 0.93)            |
| svPPA           | 84  | 27.6 (6.0, 77.7)                                  | 1.94 (1.76, 2.11)   | <0.001  | 1.53 (1.34, 1.72)            | <0.001  | 0.98 (0.96, 1.00)   | 0.89 (0.85, 0.94)            |
| CBS             | 89  | 28.1 (5.3, 177.6)                                 | 1.93 (1.72, 2.14)   | <0.001  | 1.46 (1.23, 1.69)            | <0.001  | 0.95 (0.91, 0.98)   | 0.84 (0.78, 0.89)            |
| PSP-RS          | 124 | 25.3 (6.6, 112.0)                                 | 1.83 (1.67, 1.99)   | <0.001  | 1.46 (1.25, 1.66)            | <0.001  | 0.97 (0.95, 0.99)   | 0.82 (0.77, 0.87)            |
| FTD/ALS         | 25  | 42.3 (8.9, 217.9)                                 | 2.48 (2.18, 2.78)   | <0.001  | 2.31 (2.03, 2.60)            | <0.001  | 0.97 (0.94, 1.00)   | 0.97 (0.95, 1.00)            |
| ALS             | 12  | 60.8 (10.0, 121.7)                                | 2.99 (2.60, 3.38)   | <0.001  | 2.77 (2.43, 3.10)            | <0.001  | 0.98 (0.95, 1.02)   | 0.97 (0.90, 1.03)            |
| MCI             | 57  | 12.9 (2.7, 146.8)                                 | 0.83 (0.58, 1.09)   | <0.001  | 0.66 (0.42, 0.89)            | <0.001  | 0.72 (0.63, 0.81)   | 0.68 (0.59, 0.78)            |
| Presymptomatic  | 85  | 8.3 (3.3, 68.2)                                   | 0.00 (reference)    | N/A     | 0.00 (reference)             | N/A     | N/A                 | N/A                          |
| bvFTD           | 289 | 24.2 (4.7, 246.4)                                 | 1.46 (1.21, 1.71)   | <0.001  | 1.32 (1.06, 1.59)            | <0.001  | 0.86 (0.81, 0.90)   | 0.74 (0.68, 0.80)            |
| nfvPPA          | 72  | 28.7 (7.1, 96.5)                                  | 1.80 (1.54, 2.05)   | <0.001  | 1.48 (1.14, 1.81)            | <0.001  | 0.94 (0.90, 0.98)   | 0.75 (0.68, 0.83)            |
| svPPA           | 84  | 27.6 (6.0, 77.7)                                  | 1.68 (1.44, 1.92)   | <0.001  | 1.32 (1.02, 1.61)            | <0.001  | 0.93 (0.89, 0.97)   | 0.78 (0.71, 0.86)            |
| CBS             | 89  | 28.1 (5.3, 177.6)                                 | 1.68 (1.40, 1.96)   | <0.001  | 1.21 (0.88, 1.55)            | <0.001  | 0.90 (0.85, 0.95)   | 0.72 (0.65, 0.80)            |
| PSP-RS          | 124 | 25.3 (6.6, 112.0)                                 | 1.58 (1.36, 1.79)   | <0.001  | 1.29 (0.98, 1.59)            | <0.001  | 0.92 (0.87, 0.96)   | 0.69 (0.62, 0.76)            |
| FTD/ALS         | 25  | 42.3 (8.9, 217.9)                                 | 2.23 (1.82, 2.64)   | <0.001  | 2.09 (1.65, 2.52)            | <0.001  | 0.93 (0.87, 0.99)   | 0.91 (0.85, 0.97)            |
| ALS             | 12  | 60.8 (10.0, 121.7)                                | 2.74 (2.20, 3.27)   | <0.001  | 2.53 (1.99, 3.08)            | <0.001  | 0.96 (0.90, 1.02)   | 0.93 (0.83, 1.03)            |
| MCI             | 57  | 12.9 (2.7, 146.8)                                 | 0.58 (0.24, 0.92)   | 0.001   | 0.35 (0.01, 0.68)            | 0.045   | 0.65 (0.55, 0.75)   | 0.57 (0.47, 0.68)            |

$\beta$ =regression coefficient; CI=confidence interval.  $\beta$  values, 95% CIs, and p values result from linear regression models.  $\beta$  values are interpreted as the difference in the mean NfL concentration (on the base-2 logarithm scale) for the given phenotype group in comparison to controls or presymptomatic mutation carriers. p values < 0.0056 and < 0.0063 are considered statistically significant after correcting for the comparisons of NfL between controls and 9 different overall phenotype groups or presymptomatic mutation carriers and 8 different phenotype groups, respectively. AUC, area under the receiver operating characteristic curve. See also Figures 2A, 2D and S1D.

**Table S4: Comparisons of baseline NfL concentrations between controls or presymptomatic mutation carriers and phenotype groups when stratifying by symptom duration, Related to Figures 2A, 2D and S1D**

| Phenotype group                 | n   | Median (min, max) NfL concentration (pg/ml) | Unadjusted analysis |         | Adjusting for age and gender |         | AUC (95% CI)        |                              |
|---------------------------------|-----|---------------------------------------------|---------------------|---------|------------------------------|---------|---------------------|------------------------------|
|                                 |     |                                             | $\beta$ (95% CI)    | p value | $\beta$ (95% CI)             | p value | Unadjusted analysis | Adjusting for age and gender |
| Controls                        | 144 | 7.1 (2.6, 25.4)                             | 0.00 (reference)    | N/A     | 0.00 (reference)             | N/A     | N/A                 | N/A                          |
| bvFTD                           |     |                                             |                     |         |                              |         |                     |                              |
| Symptom duration $\leq 5$ years | 186 | 26.9 (4.7, 246.4)                           | 1.84 (1.64, 2.03)   | <0.001  | 1.74 (1.54, 1.94)            | <0.001  | 0.93 (0.90, 0.96)   | 0.89 (0.85, 0.92)            |
| Symptom duration >5 years       | 103 | 20.4 (4.7, 163.9)                           | 1.48 (1.27, 1.70)   | <0.001  | 1.24 (1.00, 1.47)            | <0.001  | 0.89 (0.85, 0.93)   | 0.78 (0.72, 0.84)            |
| nvPPA                           |     |                                             |                     |         |                              |         |                     |                              |
| Symptom duration $\leq 5$ years | 55  | 30.6 (7.1, 96.5)                            | 2.08 (1.86, 2.29)   | <0.001  | 1.63 (1.40, 1.86)            | <0.001  | 0.98 (0.96, 1.00)   | 0.86 (0.80, 0.93)            |
| Symptom duration >5 years       | 17  | 28.4 (13.5, 43.9)                           | 1.96 (1.66, 2.27)   | <0.001  | 1.44 (1.15, 1.72)            | <0.001  | 0.99 (0.98, 1.00)   | 0.90 (0.82, 0.98)            |
| svPPA                           |     |                                             |                     |         |                              |         |                     |                              |
| Symptom duration $\leq 5$ years | 42  | 26.4 (11.6, 60.6)                           | 1.91 (1.70, 2.12)   | <0.001  | 1.51 (1.31, 1.72)            | <0.001  | 0.98 (0.97, 1.00)   | 0.92 (0.86, 0.97)            |
| Symptom duration >5 years       | 42  | 30.2 (6.0, 77.7)                            | 1.96 (1.73, 2.19)   | <0.001  | 1.52 (1.29, 1.74)            | <0.001  | 0.97 (0.93, 1.00)   | 0.87 (0.80, 0.95)            |
| CBS                             |     |                                             |                     |         |                              |         |                     |                              |
| Symptom duration $\leq 5$ years | 63  | 27.3 (5.3, 124.7)                           | 1.91 (1.68, 2.14)   | <0.001  | 1.41 (1.18, 1.64)            | <0.001  | 0.94 (0.89, 0.98)   | 0.85 (0.79, 0.91)            |
| Symptom duration >5 years       | 26  | 28.3 (9.2, 177.6)                           | 1.99 (1.71, 2.28)   | <0.001  | 1.49 (1.20, 1.79)            | <0.001  | 0.97 (0.95, 1.00)   | 0.80 (0.69, 0.91)            |
| PSP-RS                          |     |                                             |                     |         |                              |         |                     |                              |
| Symptom duration $\leq 5$ years | 77  | 26.6 (6.6, 112.0)                           | 1.90 (1.71, 2.09)   | <0.001  | 1.45 (1.24, 1.66)            | <0.001  | 0.97 (0.95, 0.99)   | 0.85 (0.80, 0.90)            |
| Symptom duration >5 years       | 47  | 23.9 (8.8, 59.2)                            | 1.72 (1.51, 1.93)   | <0.001  | 1.24 (0.99, 1.48)            | <0.001  | 0.97 (0.94, 0.99)   | 0.76 (0.68, 0.85)            |
| FTD/ALS                         |     |                                             |                     |         |                              |         |                     |                              |
| Symptom duration $\leq 5$ years | 19  | 42.6 (9.2, 217.9)                           | 2.68 (2.35, 3.00)   | <0.001  | 2.54 (2.24, 2.84)            | <0.001  | 0.98 (0.96, 1.01)   | 0.98 (0.96, 1.01)            |
| Symptom duration >5 years       | 6   | 38.8 (8.9, 54.9)                            | 1.87 (1.34, 2.40)   | <0.001  | 1.54 (1.12, 1.95)            | <0.001  | 0.92 (0.82, 1.03)   | 0.94 (0.87, 1.02)            |
| ALS                             |     |                                             |                     |         |                              |         |                     |                              |
| Symptom duration $\leq 5$ years | 10  | 70.5 (10.0, 121.7)                          | 3.05 (2.62, 3.47)   | <0.001  | 2.82 (2.46, 3.18)            | <0.001  | 0.98 (0.94, 1.02)   | 0.96 (0.88, 1.04)            |
| Symptom duration >5 years       | 2   | 48.0 (45.2, 50.8)                           | 2.72 (1.85, 3.59)   | <0.001  | 2.50 (1.82, 3.19)            | <0.001  | 1.00 (1.00, 1.00)   | 1.00 (1.00, 1.00)            |
| MCI                             |     |                                             |                     |         |                              |         |                     |                              |
| Symptom duration $\leq 5$ years | 45  | 10.9 (2.7, 146.8)                           | 0.78 (0.50, 1.06)   | <0.001  | 0.64 (0.40, 0.89)            | <0.001  | 0.70 (0.59, 0.80)   | 0.66 (0.55, 0.77)            |
| Symptom duration >5 years       | 12  | 13.7 (4.7, 53.3)                            | 1.03 (0.64, 1.42)   | <0.001  | 0.72 (0.39, 1.04)            | <0.001  | 0.81 (0.66, 0.97)   | 0.75 (0.58, 0.93)            |
| Presymptomatic                  | 85  | 8.3 (3.3, 68.2)                             | 0.00 (reference)    | N/A     | 0.00 (reference)             | N/A     | N/A                 | N/A                          |
| bvFTD                           |     |                                             |                     |         |                              |         |                     |                              |
| Symptom duration $\leq 5$ years | 186 | 26.9 (4.7, 246.4)                           | 1.58 (1.32, 1.84)   | <0.001  | 1.43 (1.15, 1.70)            | <0.001  | 0.88 (0.83, 0.92)   | 0.79 (0.73, 0.84)            |
| Symptom duration >5 years       | 103 | 20.4 (4.7, 163.9)                           | 1.23 (0.95, 1.51)   | <0.001  | 0.98 (0.65, 1.31)            | <0.001  | 0.83 (0.77, 0.89)   | 0.66 (0.58, 0.74)            |
| nvPPA                           |     |                                             |                     |         |                              |         |                     |                              |
| Symptom duration $\leq 5$ years | 55  | 30.6 (7.1, 96.5)                            | 1.82 (1.53, 2.11)   | <0.001  | 1.46 (1.10, 1.83)            | <0.001  | 0.94 (0.89, 0.98)   | 0.75 (0.67, 0.84)            |
| Symptom duration >5 years       | 17  | 28.4 (13.5, 43.9)                           | 1.71 (1.28, 2.13)   | <0.001  | 1.30 (0.80, 1.79)            | <0.001  | 0.95 (0.91, 0.99)   | 0.77 (0.65, 0.88)            |
| svPPA                           |     |                                             |                     |         |                              |         |                     |                              |
| Symptom duration $\leq 5$ years | 42  | 26.4 (11.6, 60.6)                           | 1.66 (1.36, 1.95)   | <0.001  | 1.32 (0.98, 1.66)            | <0.001  | 0.94 (0.90, 0.98)   | 0.81 (0.73, 0.89)            |

|         |                           |    |                    |                   |        |                    |        |                   |                   |
|---------|---------------------------|----|--------------------|-------------------|--------|--------------------|--------|-------------------|-------------------|
| CBS     | Symptom duration >5 years | 42 | 30.2 (6.0, 77.7)   | 1.71 (1.39, 2.02) | <0.001 | 1.29 (0.92, 1.66)  | <0.001 | 0.93 (0.88, 0.98) | 0.76 (0.67, 0.85) |
|         | Symptom duration ≤5 years | 63 | 27.3 (5.3, 124.7)  | 1.65 (1.35, 1.96) | <0.001 | 1.15 (0.80, 1.50)  | <0.001 | 0.89 (0.83, 0.95) | 0.74 (0.66, 0.82) |
| PSP-RS  | Symptom duration >5 years | 26 | 28.3 (9.2, 177.6)  | 1.74 (1.35, 2.13) | <0.001 | 1.37 (0.88, 1.86)  | <0.001 | 0.92 (0.87, 0.98) | 0.69 (0.57, 0.81) |
|         | Symptom duration ≤5 years | 77 | 26.6 (6.6, 112.0)  | 1.64 (1.39, 1.90) | <0.001 | 1.23 (0.90, 1.56)  | <0.001 | 0.92 (0.88, 0.97) | 0.73 (0.65, 0.80) |
| FTD/ALS | Symptom duration >5 years | 47 | 23.9 (8.8, 59.2)   | 1.46 (1.18, 1.75) | <0.001 | 1.15 (0.74, 1.55)  | <0.001 | 0.91 (0.86, 0.96) | 0.63 (0.53, 0.73) |
|         | Symptom duration ≤5 years | 19 | 42.6 (9.2, 217.9)  | 2.42 (1.97, 2.87) | <0.001 | 2.32 (1.86, 2.79)  | <0.001 | 0.95 (0.90, 1.00) | 0.93 (0.88, 0.99) |
| ALS     | Symptom duration >5 years | 6  | 38.8 (8.9, 54.9)   | 1.62 (0.88, 2.35) | <0.001 | 1.28 (0.57, 1.99)  | <0.001 | 0.86 (0.70, 1.02) | 0.84 (0.70, 0.98) |
|         | Symptom duration ≤5 years | 10 | 70.5 (10.0, 121.7) | 2.79 (2.21, 3.38) | <0.001 | 2.58 (1.99, 3.17)  | <0.001 | 0.96 (0.89, 1.02) | 0.92 (0.80, 1.04) |
| MCI     | Symptom duration >5 years | 2  | 48.0 (45.2, 50.8)  | 2.47 (1.25, 3.68) | <0.001 | 2.30 (1.12, 3.47)  | <0.001 | 0.98 (0.94, 1.01) | 0.97 (0.92, 1.02) |
|         | Symptom duration ≤5 years | 45 | 10.9 (2.7, 146.8)  | 0.53 (0.16, 0.89) | 0.006  | 0.33 (-0.03, 0.69) | 0.072  | 0.63 (0.52, 0.74) | 0.56 (0.45, 0.67) |
|         | Symptom duration >5 years | 12 | 13.7 (4.7, 53.3)   | 0.78 (0.24, 1.32) | 0.005  | 0.48 (-0.06, 1.03) | 0.082  | 0.74 (0.58, 0.90) | 0.64 (0.46, 0.81) |

β=regression coefficient; CI=confidence interval. β values, 95% CIs, and p values result from linear regression models. β values are interpreted as the difference in the mean NfL concentration (on the base-2 logarithm scale) for the given phenotype group in comparison to controls or to presymptomatic mutation carriers. p values < 0.0031 are considered statistically significant after correcting for the comparisons of NfL between controls and 16 different overall groups. AUC, area under the receiver operating characteristic curve. See also Figures 2A, 2D and S1D.

**Table S5. Comparisons of baseline NfL concentrations between controls, presymptomatic mutation carriers who did not phenoconvert after baseline, and presymptomatic mutation carriers who did phenoconvert, Related to Figures 2B and S1E**

| Mutation Status                | n   | Median (minimum, maximum) NfL concentration (pg/ml) | Unadjusted analysis |                  | Adjusting for age and gender |                  |
|--------------------------------|-----|-----------------------------------------------------|---------------------|------------------|------------------------------|------------------|
|                                |     |                                                     | $\beta$ (95% CI)    | p value          | $\beta$ (95% CI)             | p value          |
| Controls                       | 144 | 7.1 (2.6, 25.4)                                     | 0.00 (reference)    | N/A              | 0.00 (reference)             | N/A              |
| Presymptomatic non-converters  | 43  | 7.0 (3.3, 68.2)                                     | 0.12 (-0.11, 0.35)  | 0.31             | 0.27 (0.08, 0.46)            | <b>0.006</b>     |
| Presymptomatic phenoconverters | 14  | 13.2 (4.7, 65.9)                                    | 0.52 (0.34, 0.71)   | <b>&lt;0.001</b> | 0.56 (0.41, 0.71)            | <b>&lt;0.001</b> |
| Presymptomatic non-converters  | 43  | 7.0 (3.3, 68.2)                                     | 0.00 (reference)    | N/A              | 0.00 (reference)             | N/A              |
| Presymptomatic phenoconverters | 14  | 13.2 (4.7, 65.9)                                    | 0.93 (0.40, 1.45)   | <b>&lt;0.001</b> | 0.88 (0.38, 1.38)            | <b>&lt;0.001</b> |

$\beta$ =regression coefficient; CI=confidence interval.  $\beta$  values, 95% CIs, and p values result from linear regression models.  $\beta$  values are interpreted as the difference in the mean NfL concentration (on the base-2 logarithm scale) for presymptomatic mutation carriers who phenoconverted after baseline to presymptomatic carriers who did not phenoconvert for at least one year from baseline. See also Figures 2B and S1E.

**Table S6: Comparisons of baseline NfL concentration between controls or presymptomatic mutation carriers and phenotype groups for patients with a CDR+NACC-FTLD global score of 0 or 0.5, Related to Figures 2C and 2D**

| Phenotype group | n   | Median (min, max)<br>NfL concentration<br>(pg/ml) | Unadjusted analysis |                | Adjusting for age and gender |                | AUC (95% CI)        |                              |
|-----------------|-----|---------------------------------------------------|---------------------|----------------|------------------------------|----------------|---------------------|------------------------------|
|                 |     |                                                   | $\beta$ (95% CI)    | p value        | $\beta$ (95% CI)             | p value        | Unadjusted analysis | Adjusting for age and gender |
| Controls        | 144 | 7.1 (2.6, 25.4)                                   | 0.00 (reference)    | N/A            | 0.00 (reference)             | N/A            | N/A                 | N/A                          |
| bvFTD           | 19  | 16.1 (4.7, 125.4)                                 | 1.27 (0.94, 1.60)   | < <b>0.001</b> | 1.03 (0.76, 1.30)            | < <b>0.001</b> | 0.87 (0.76, 0.97)   | 0.88 (0.81, 0.95)            |
| nvPPA           | 27  | 29.6 (12.5, 65.2)                                 | 2.09 (1.83, 2.35)   | < <b>0.001</b> | 1.59 (1.34, 1.84)            | < <b>0.001</b> | 0.99 (0.98, 1.00)   | 0.94 (0.91, 0.98)            |
| svPPA           | 11  | 17.6 (12.3, 44.6)                                 | 1.43 (1.05, 1.81)   | < <b>0.001</b> | 1.04 (0.72, 1.36)            | < <b>0.001</b> | 0.97 (0.94, 1.00)   | 0.94 (0.89, 0.98)            |
| CBS             | 26  | 22.8 (5.6, 124.7)                                 | 1.67 (1.38, 1.95)   | < <b>0.001</b> | 1.11 (0.85, 1.36)            | < <b>0.001</b> | 0.93 (0.85, 1.00)   | 0.88 (0.81, 0.96)            |
| PSP-RS          | 23  | 26.0 (6.6, 112.0)                                 | 1.82 (1.53, 2.12)   | < <b>0.001</b> | 1.31 (1.05, 1.58)            | < <b>0.001</b> | 0.95 (0.90, 1.00)   | 0.88 (0.80, 0.97)            |
| Presymptomatic  | 85  | 8.3 (3.3, 68.2)                                   | 0.00 (reference)    | N/A            | 0.00 (reference)             | N/A            | N/A                 | N/A                          |
| bvFTD           | 19  | 16.1 (4.7, 125.4)                                 | 1.02 (0.57, 1.47)   | < <b>0.001</b> | 0.75 (0.30, 1.19)            | <b>0.001</b>   | 0.81 (0.69, 0.92)   | 0.74 (0.63, 0.86)            |
| nvPPA           | 27  | 29.6 (12.5, 65.2)                                 | 1.84 (1.48, 2.19)   | < <b>0.001</b> | 1.45 (1.02, 1.87)            | < <b>0.001</b> | 0.95 (0.91, 0.99)   | 0.83 (0.75, 0.91)            |
| svPPA           | 11  | 17.6 (12.3, 44.6)                                 | 1.17 (0.65, 1.70)   | < <b>0.001</b> | 0.84 (0.29, 1.39)            | <b>0.003</b>   | 0.90 (0.84, 0.97)   | 0.81 (0.71, 0.91)            |
| CBS             | 26  | 22.8 (5.6, 124.7)                                 | 1.41 (1.02, 1.80)   | < <b>0.001</b> | 0.86 (0.43, 1.29)            | < <b>0.001</b> | 0.88 (0.79, 0.96)   | 0.76 (0.66, 0.86)            |
| PSP-RS          | 23  | 26.0 (6.6, 112.0)                                 | 1.57 (1.16, 1.97)   | < <b>0.001</b> | 1.08 (0.63, 1.54)            | < <b>0.001</b> | 0.90 (0.83, 0.97)   | 0.78 (0.67, 0.89)            |

$\beta$ =regression coefficient; CI=confidence interval.  $\beta$  values, 95% CIs, and p values result from linear regression models.  $\beta$  values are interpreted as the difference in the mean NfL concentration (on the base-2 logarithm scale) for the given phenotype group in comparison to controls or presymptomatic mutation carriers. p values < 0.01 are considered as statistically significant after correcting for multiple testing. AUC, area under the receiver operating characteristic curve. See also Figures 2C and 2D.

**Table S7: Comparisons of baseline NfL concentration between symptomatic groups, Related to Figures 2A and S1D**

| Analysis adjusted for age, gender, and symptom duration |     |                                                     |                    |                   |                 |                    |                     |                 |                 |
|---------------------------------------------------------|-----|-----------------------------------------------------|--------------------|-------------------|-----------------|--------------------|---------------------|-----------------|-----------------|
| Phenotype group                                         | n   | Median (minimum, maximum) NfL concentration (pg/ml) | p value vs. nfvPPA | p value vs. svPPA | p value vs. CBS | p value vs. PSP-RS | p value vs. FTD/ALS | p value vs. ALS | p value vs. MCI |
| bvFTD                                                   | 289 | 24.2 (4.7, 246.4)                                   | 0.40               | 0.26              | 0.62            | 0.71               | 0.014               | <0.001          | <0.001          |
| nfvPPA                                                  | 72  | 28.7 (7.1, 96.5)                                    | ----               | 0.93              | 0.55            | 0.079              | 0.063               | <0.001          | <0.001          |
| svPPA                                                   | 84  | 27.6 (6.0, 77.7)                                    | ----               | ----              | 0.70            | 0.13               | 0.030               | <0.001          | <0.001          |
| CBS                                                     | 89  | 28.1 (5.3, 177.6)                                   | ----               | ----              | ----            | 0.25               | 0.022               | <0.001          | <0.001          |
| PSP-RS                                                  | 124 | 25.3 (6.6, 112.0)                                   | ----               | ----              | ----            | ----               | 0.005               | <0.001          | <0.001          |
| FTD/ALS                                                 | 25  | 42.3 (8.9, 217.9)                                   | ----               | ----              | ----            | ----               | ----                | 0.16            | <0.001          |
| ALS                                                     | 12  | 60.8 (10.0, 121.7)                                  | ----               | ----              | ----            | ----               | ----                | ----            | <0.001          |
| MCI                                                     | 57  | 12.9 (2.7, 146.8)                                   | ----               | ----              | ----            | ----               | ----                | ----            | ----            |

p values result from linear regression models that were adjusted for age, gender, and symptom duration. p values < 0.0018 are considered statistically significant after correcting for multiple testing. See also Figures 2A and S1D.

**Table S8: Comparisons of baseline NfL concentrations in clinically normal individuals, bvFTD patients and MCI patients according to mutation status, Related to Figure 2E**

| Phenotype group/Mutation status                       | n   | Median (minimum, maximum) NfL concentration (pg/ml) | Unadjusted analysis  |                  | Adjusting for age, gender, and symptom duration |                  |
|-------------------------------------------------------|-----|-----------------------------------------------------|----------------------|------------------|-------------------------------------------------|------------------|
|                                                       |     |                                                     | $\beta$ (95% CI)     | p value          | $\beta$ (95% CI)                                | p value          |
| Clinically normal                                     |     |                                                     |                      |                  |                                                 |                  |
| No mutation                                           | 144 | 7.1 (2.6, 25.4)                                     | 0.00 (reference)     | N/A              | 0.00 (reference)                                | N/A              |
| <i>C9orf72</i> mutation                               | 35  | 8.0 (3.3, 68.2)                                     | 0.23 (-0.02, 0.48)   | 0.073            | 0.31 (0.10, 0.51)                               | <b>0.004</b>     |
| <i>GRN</i> mutation                                   | 26  | 7.5 (3.3, 65.9)                                     | 0.29 (0.01, 0.58)    | 0.046            | 0.23 (-0.01, 0.47)                              | 0.066            |
| <i>MAPT</i> mutation                                  | 22  | 8.6 (3.6, 23.9)                                     | 0.19 (-0.09, 0.47)   | 0.19             | 0.50 (0.27, 0.74)                               | <b>&lt;0.001</b> |
| bvFTD                                                 |     |                                                     |                      |                  |                                                 |                  |
| No mutation                                           | 188 | 24.1 (5.0, 163.9)                                   | 0.00 (reference)     | N/A              | 0.00 (reference)                                | N/A              |
| <i>C9orf72</i> , <i>GRN</i> , or <i>MAPT</i> mutation | 86  | 24.8 (4.7, 246.4)                                   | 0.01 (-0.27, 0.28)   | 0.96             | 0.07 (-0.20, 0.34)                              | 0.62             |
| <i>C9orf72</i> mutation                               | 43  | 24.8 (5.1, 87.0)                                    | -0.13 (-0.47, 0.22)  | 0.47             | -0.08 (-0.42, 0.25)                             | 0.62             |
| <i>GRN</i> mutation                                   | 15  | 68.9 (27.4, 246.4)                                  | 1.28 (0.74, 1.82)    | <b>&lt;0.001</b> | 1.17 (0.66, 1.69)                               | <b>&lt;0.001</b> |
| <i>MAPT</i> mutation                                  | 28  | 17.7 (4.7, 164.0)                                   | -0.47 (-0.88, -0.06) | 0.024            | -0.34 (-0.77, 0.10)                             | 0.13             |
| MCI                                                   |     |                                                     |                      |                  |                                                 |                  |
| No mutation                                           | 28  | 13.7 (3.9, 146.8)                                   | 0.00 (reference)     | N/A              | 0.00 (reference)                                | N/A              |
| <i>C9orf72</i> , <i>GRN</i> , or <i>MAPT</i> mutation | 28  | 11.9 (2.7, 76.0)                                    | -0.08 (-0.74, 0.58)  | 0.80             | 0.06 (-0.56, 0.69)                              | 0.84             |

$\beta$ =regression coefficient; CI=confidence interval.  $\beta$  values, 95% CIs, and p values result from linear regression models.  $\beta$  values are interpreted as the difference in the mean NfL concentration (on the base-2 logarithm scale) for the given mutation group in comparison to individuals without a mutation. Models involving clinically normal individuals were not adjusted for symptom duration. p values < 0.0083 (six pairwise comparisons for clinically normal individuals; see also Table S9) and <0.0071 (seven pairwise comparisons bvFTD patients; see also Table S9) are considered statistically significant after correcting for multiple testing. See also Figure 2E.



**Table S9: Comparisons of baseline NfL concentration among mutation carriers in presymptomatic individuals and patients with bvFTD, Related to Figure 2E**

| Phenotype group/Mutation status | n  | Median (minimum, maximum) NfL concentration (pg/ml) | Adjusting for age and gender and, for bvFTD only, symptom duration |                                  |
|---------------------------------|----|-----------------------------------------------------|--------------------------------------------------------------------|----------------------------------|
|                                 |    |                                                     | p value vs. <i>GRN</i> mutation                                    | p value vs. <i>MAPT</i> mutation |
| Presymptomatic                  |    |                                                     |                                                                    |                                  |
| <i>C9orf72</i> mutation         | 35 | 8.0 (3.3, 68.2)                                     | 0.85                                                               | 0.47                             |
| <i>GRN</i> mutation             | 26 | 7.5 (3.3, 65.9)                                     | ----                                                               | 0.43                             |
| <i>MAPT</i> mutation            | 22 | 8.6 (3.6, 23.9)                                     | ----                                                               | ----                             |
| bvFTD                           |    |                                                     |                                                                    |                                  |
| <i>C9orf72</i> mutation         | 43 | 24.8 (5.1, 87.0)                                    | <b>&lt;0.001</b>                                                   | 0.20                             |
| <i>GRN</i> mutation             | 15 | 68.9 (27.4, 246.4)                                  | ----                                                               | <b>&lt;0.001</b>                 |
| <i>MAPT</i> mutation            | 28 | 17.7 (4.7, 164.0)                                   | ----                                                               | ----                             |

p values result from linear regression models that were adjusted for age, gender and, only for bvFTD patients, symptom duration. p values < 0.0083 (six pairwise comparisons for clinically normal individuals; see also Table S8) and <0.0071 (seven pairwise comparisons bvFTD patients; see also Table S8) are considered statistically significant after correcting for multiple testing. See also Figure 2E.

**Table S10: Disease severity characteristics according to phenotype group, Related to Tables 2 and S11**

| Variable                                | Median (minimum, maximum) or No. (%) of subjects |                   |                   |                 |                     |                     |                 |                 |
|-----------------------------------------|--------------------------------------------------|-------------------|-------------------|-----------------|---------------------|---------------------|-----------------|-----------------|
|                                         | bvFTD<br>(n = 289)                               | nvPPA<br>(n = 72) | svPPA<br>(n = 84) | CBS<br>(n = 89) | PSP-RS<br>(n = 124) | FTD/ALS<br>(n = 25) | ALS<br>(n = 12) | MCI<br>(n = 57) |
| CDR+NACC-FTLDSb                         | 9 (1, 24)                                        | 4 (1, 24)         | 7 (2, 20)         | 5 (0, 23)       | 7 (0, 21)           | 8 (0, 20)           | 2 (0, 12)       | 2 (0, 4)        |
| <b>CDR+NACC-FTLD Domains</b>            |                                                  |                   |                   |                 |                     |                     |                 |                 |
| <b>Memory</b>                           |                                                  |                   |                   |                 |                     |                     |                 |                 |
| 0                                       | 35 (12.1%)                                       | 34 (47.2%)        | 5 (6.0%)          | 22 (24.7%)      | 29 (23.4%)          | 1 (4.0%)            | 8 (66.7%)       | 21 (36.8%)      |
| 0.5                                     | 86 (29.8%)                                       | 21 (29.2%)        | 33 (39.3%)        | 40 (44.9%)      | 54 (43.5%)          | 12 (48.0%)          | 2 (16.7%)       | 31 (54.4%)      |
| ≥1                                      | 168 (58.1%)                                      | 17 (23.6%)        | 46 (54.8%)        | 27 (30.3%)      | 41 (33.1%)          | 12 (48.0%)          | 2 (16.7%)       | 5 (8.8%)        |
| <b>Orientation</b>                      |                                                  |                   |                   |                 |                     |                     |                 |                 |
| 0                                       | 98 (33.9%)                                       | 52 (72.2%)        | 44 (52.4%)        | 52 (58.4%)      | 58 (46.8%)          | 6 (24.0%)           | 9 (75.0%)       | 43 (75.4%)      |
| 0.5                                     | 70 (24.2%)                                       | 7 (9.7%)          | 18 (21.4%)        | 14 (15.7%)      | 44 (35.5%)          | 10 (40.0%)          | 2 (16.7%)       | 14 (24.6%)      |
| ≥1                                      | 121 (41.9%)                                      | 13 (18.1%)        | 22 (26.2%)        | 23 (25.8%)      | 22 (17.7%)          | 9 (36.0%)           | 1 (8.3%)        | 0 (0.0%)        |
| <b>Judgment and Problem Solving</b>     |                                                  |                   |                   |                 |                     |                     |                 |                 |
| 0                                       | 2 (0.7%)                                         | 21 (29.2%)        | 5 (6.0%)          | 17 (19.1%)      | 12 (9.7%)           | 1 (4.0%)            | 4 (33.3%)       | 18 (31.6%)      |
| 0.5                                     | 32 (11.1%)                                       | 26 (36.1%)        | 14 (16.7%)        | 24 (27.0%)      | 36 (29.0%)          | 4 (16.0%)           | 5 (41.7%)       | 37 (64.9%)      |
| ≥1                                      | 255 (88.2%)                                      | 25 (34.7%)        | 65 (77.4%)        | 48 (53.9%)      | 76 (61.3%)          | 20 (80.0%)          | 3 (25.0%)       | 2 (3.5%)        |
| <b>Community Affairs</b>                |                                                  |                   |                   |                 |                     |                     |                 |                 |
| 0                                       | 13 (4.5%)                                        | 20 (27.8%)        | 6 (7.1%)          | 20 (22.5%)      | 9 (7.3%)            | 2 (8.0%)            | 6 (50.0%)       | 33 (57.9%)      |
| 0.5                                     | 47 (16.3%)                                       | 28 (38.9%)        | 22 (26.2%)        | 24 (27.0%)      | 28 (22.6%)          | 2 (8.0%)            | 2 (16.7%)       | 23 (40.4%)      |
| ≥1                                      | 229 (79.2%)                                      | 24 (33.3%)        | 56 (66.7%)        | 45 (50.6%)      | 87 (70.2%)          | 21 (84.0%)          | 4 (33.3%)       | 1 (1.8%)        |
| <b>Home and Hobbies</b>                 |                                                  |                   |                   |                 |                     |                     |                 |                 |
| 0                                       | 16 (5.5%)                                        | 26 (36.1%)        | 8 (9.5%)          | 16 (18.0%)      | 15 (12.1%)          | 2 (8.0%)            | 7 (58.3%)       | 37 (64.9%)      |
| 0.5                                     | 52 (18.0%)                                       | 23 (31.9%)        | 34 (40.5%)        | 24 (27.0%)      | 24 (19.4%)          | 4 (16.0%)           | 2 (16.7%)       | 20 (35.1%)      |
| ≥1                                      | 221 (76.5%)                                      | 23 (31.9%)        | 42 (50.0%)        | 49 (55.1%)      | 85 (68.5%)          | 19 (76.0%)          | 3 (25.0%)       | 0 (0.0%)        |
| <b>Personal Care</b>                    |                                                  |                   |                   |                 |                     |                     |                 |                 |
| 0                                       | 122 (42.2%)                                      | 62 (86.1%)        | 65 (77.4%)        | 51 (57.3%)      | 61 (49.2%)          | 13 (52.0%)          | 9 (75.0%)       | 57 (100.0%)     |
| 0.5                                     | 0 (0.0%)                                         | 0 (0.0%)          | 0 (0.0%)          | 0 (0.0%)        | 0 (0.0%)            | 0 (0.0%)            | 0 (0.0%)        | 0 (0.0%)        |
| ≥1                                      | 167 (57.8%)                                      | 10 (13.9%)        | 19 (22.6%)        | 38 (42.7%)      | 63 (50.8%)          | 12 (48.0%)          | 3 (25.0%)       | 0 (0.0%)        |
| <b>Behavior/Compartment/Personality</b> |                                                  |                   |                   |                 |                     |                     |                 |                 |
| 0                                       | 0 (0.0%)                                         | 32 (44.4%)        | 11 (13.1%)        | 45 (50.6%)      | 33 (26.6%)          | 2 (8.0%)            | 5 (41.7%)       | 16 (28.1%)      |
| 0.5                                     | 19 (6.6%)                                        | 25 (34.7%)        | 21 (25.0%)        | 18 (20.2%)      | 38 (30.6%)          | 3 (12.0%)           | 5 (41.7%)       | 25 (43.9%)      |
| ≥1                                      | 270 (93.4%)                                      | 15 (20.8%)        | 52 (61.9%)        | 26 (29.2%)      | 53 (42.7%)          | 20 (80.0%)          | 2 (16.7%)       | 16 (28.1%)      |
| <b>Language</b>                         |                                                  |                   |                   |                 |                     |                     |                 |                 |
| 0                                       | 88 (30.4%)                                       | 0 (0.0%)          | 0 (0.0%)          | 23 (25.8%)      | 18 (14.5%)          | 5 (20.0%)           | 5 (41.7%)       | 36 (63.2%)      |
| 0.5                                     | 98 (33.9%)                                       | 7 (9.7%)          | 13 (15.5%)        | 29 (32.6%)      | 50 (40.3%)          | 8 (32.0%)           | 6 (50.0%)       | 19 (33.3%)      |
| ≥1                                      | 103 (35.6%)                                      | 65 (90.3%)        | 71 (84.5%)        | 37 (41.6%)      | 56 (45.2%)          | 12 (48.0%)          | 1 (8.3%)        | 2 (3.5%)        |
| MoCA                                    | 20 (1, 30)                                       | 22 (1, 30)        | 17 (0, 27)        | 23 (1, 30)      | 22 (2, 30)          | 19 (2, 26)          | 23 (10, 29)     | 25 (14, 30)     |
| Unknown                                 | 22                                               | 11                | 4                 | 18              | 10                  | 1                   | 3               | 0               |
| SNQ                                     | 17 (8, 22)                                       | 18 (8, 22)        | 18 (10, 21)       | 19 (14, 22)     | 19 (12, 22)         | 18.5 (10, 22)       | 19 (14, 22)     | 19 (12, 22)     |

|                     |               |               |              |               |               |               |               |              |
|---------------------|---------------|---------------|--------------|---------------|---------------|---------------|---------------|--------------|
| Unknown             | 53            | 15            | 15           | 13            | 19            | 7             | 0             | 1            |
| MINT                | 27 (0, 32)    | 29 (0, 32)    | 8 (0, 29)    | 30 (17, 32)   | 29 (5, 32)    | 28 (7, 32)    | 29 (16, 32)   | 30 (1, 32)   |
| Unknown             | 38            | 15            | 17           | 14            | 11            | 3             | 0             | 1            |
| NAT                 | 7 (0, 10)     | 8 (0, 10)     | 9 (1, 10)    | 9 (0, 10)     | 9 (0, 10)     | 7.5 (1, 10)   | 9 (5, 10)     | 10 (4, 10)   |
| Unknown             | 74            | 15            | 14           | 30            | 42            | 7             | 2             | 8            |
| Phonemic fluency    | 13 (0, 45)    | 11 (0, 28)    | 15 (0, 37)   | 17 (3, 39)    | 12 (0, 36)    | 13 (0, 36)    | 19 (3, 32)    | 23 (8, 44)   |
| Unknown             | 34            | 18            | 5            | 13            | 9             | 4             | 2             | 1            |
| Category fluency    | 19 (0, 53)    | 19 (0, 46)    | 10 (0, 38)   | 22 (0, 48)    | 17 (0, 40)    | 18 (0, 48)    | 22 (7, 41)    | 33.5 (4, 48) |
| Unknown             | 37            | 16            | 9            | 11            | 6             | 4             | 2             | 1            |
| Digit Span Forward  | 6 (0, 14)     | 5.5 (1, 10)   | 7 (1, 13)    | 7 (0, 14)     | 7 (1, 13)     | 6.5 (3, 12)   | 6 (4, 14)     | 7 (4, 12)    |
| Unknown             | 26            | 14            | 13           | 12            | 11            | 1             | 1             | 0            |
| Digit Span Backward | 4 (0, 12)     | 4 (0, 10)     | 6 (0, 12)    | 4 (0, 11)     | 4 (0, 10)     | 5 (0, 9)      | 5 (3, 9)      | 6 (2, 12)    |
| Unknown             | 32            | 14            | 11           | 13            | 12            | 2             | 1             | 0            |
| Trails B            | 111 (29, 300) | 134 (25, 300) | 96 (37, 300) | 172 (32, 300) | 212 (37, 300) | 194 (53, 300) | 116 (35, 300) | 84 (31, 300) |
| Unknown             | 110           | 22            | 10           | 33            | 42            | 8             | 3             | 1            |

---

CDR+NACC-FTLDSb, CDR® Dementia Staging Instrument plus behavior and language domains from the National Alzheimer's Disease Coordinating Center FTLDS module sum of boxes; MoCA, Montreal Cognitive Assessment; SNQ, Social Norms Questionnaire; MINT, Multilingual Naming Test; NAT, Northwestern Anagram Test; Trails B, Trail Making Test Part B. See also Tables 2 and S11.

---

**Table S11: Associations of baseline NfL with disease indicators in symptomatic groups from unadjusted analysis, Related to Tables 2 and S10**

| Phenotype group   | Association between NfL and: |                      |                      |                      |                      |                      |                      |                      |                      |                      |
|-------------------|------------------------------|----------------------|----------------------|----------------------|----------------------|----------------------|----------------------|----------------------|----------------------|----------------------|
|                   | CDR+NACC-FTLDsb              | MoCA                 | SNQ                  | NAT                  | MINT                 | Phonemic fluency     | Category fluency     | Digit span forward   | Digit span backward  | Trails B             |
| <b>FTD groups</b> | n = 658                      | n = 593              | n = 543              | n = 483              | n = 563              | n = 579              | n = 579              | n = 582              | n = 576              | n = 441              |
| $\beta$ (95% CI)  | 0.04 (0.02, 0.05)            | -2.05 (-2.60, -1.50) | -0.76 (-1.02, -0.51) | -0.77 (-1.03, -0.51) | -2.09 (-2.87, -1.30) | -3.90 (-4.63, -3.17) | -3.78 (-4.66, -2.90) | -0.50 (-0.72, -0.28) | -0.82 (-1.03, -0.60) | 21.32 (12.49, 30.15) |
| p value           | <b>&lt;0.001</b>             | <b>&lt;0.001</b>     | <b>&lt;0.001</b>     | <b>&lt;0.001</b>     | <b>&lt;0.001</b>     | <b>&lt;0.001</b>     | <b>&lt;0.001</b>     | <b>&lt;0.001</b>     | <b>&lt;0.001</b>     | <b>&lt;0.001</b>     |
| <b>bvFTD</b>      | n = 289                      | n = 267              | n = 236              | n = 215              | n = 251              | n = 255              | n = 252              | n = 263              | n = 257              | n = 179              |
| $\beta$ (95% CI)  | 0.06 (0.04, 0.09)            | -2.46 (-3.20, -1.72) | -1.13 (-1.49, -0.76) | -0.98 (-1.32, -0.63) | -2.66 (-3.55, -1.77) | -4.73 (-5.73, -3.73) | -5.09 (-6.27, -3.92) | -0.40 (-0.69, -0.11) | -0.93 (-1.25, -0.62) | 15.92 (4.23, 27.61)  |
| p value           | <b>&lt;0.001</b>             | <b>&lt;0.001</b>     | <b>&lt;0.001</b>     | <b>&lt;0.001</b>     | <b>&lt;0.001</b>     | <b>&lt;0.001</b>     | <b>&lt;0.001</b>     | 0.007                | <b>&lt;0.001</b>     | 0.008                |
| <b>nfvPPA</b>     | n = 72                       | n = 61               | n = 57               | n = 57               | n = 57               | n = 54               | n = 56               | n = 58               | n = 58               | n = 50               |
| $\beta$ (95% CI)  | 0.02 (-0.02, 0.06)           | -1.83 (-4.18, 0.52)  | -0.80 (-1.87, 0.26)  | -0.56 (-1.64, 0.52)  | -0.40 (-2.84, 2.03)  | -1.69 (-4.18, 0.81)  | -1.01 (-4.70, 2.68)  | -0.95 (-1.63, -0.27) | -0.48 (-1.28, 0.31)  | 30.90 (-1.76, 63.56) |
| p value           | 0.27                         | 0.13                 | 0.14                 | 0.30                 | 0.74                 | 0.18                 | 0.58                 | 0.007                | 0.23                 | 0.063                |
| <b>svPPA</b>      | n = 84                       | n = 80               | n = 69               | n = 70               | n = 67               | n = 79               | n = 75               | n = 71               | n = 73               | n = 74               |
| $\beta$ (95% CI)  | 0.05 (0.01, 0.10)            | -2.84 (-4.67, -1.00) | -0.76 (-1.72, 0.20)  | -1.34 (-2.18, -0.49) | -4.88 (-7.64, -2.13) | -3.18 (-5.92, -0.44) | -4.68 (-7.32, -2.05) | -0.90 (-1.79, -0.01) | -1.34 (-2.16, -0.53) | 19.75 (-5.65, 45.16) |
| p value           | 0.015                        | <b>0.003</b>         | 0.12                 | <b>0.002</b>         | <b>&lt;0.001</b>     | 0.024                | <b>&lt;0.001</b>     | 0.048                | <b>0.002</b>         | 0.13                 |
| <b>CBS</b>        | n = 89                       | n = 71               | n = 76               | n = 59               | n = 75               | n = 76               | n = 78               | n = 77               | n = 76               | n = 56               |
| $\beta$ (95% CI)  | 0.06 (0.01, 0.10)            | -1.53 (-2.95, -0.10) | 0.00 (-0.46, 0.47)   | -0.62 (-1.27, 0.03)  | -0.34 (-1.10, 0.41)  | -3.17 (-5.13, -1.21) | -0.81 (-3.17, 1.55)  | -0.09 (-0.73, 0.55)  | -0.56 (-1.05, -0.07) | 17.79 (-6.24, 41.81) |
| p value           | 0.012                        | 0.037                | 0.99                 | 0.062                | 0.37                 | <b>0.002</b>         | 0.50                 | 0.79                 | 0.025                | 0.14                 |
| <b>PSP-RS</b>     | n = 124                      | n = 114              | n = 105              | n = 82               | n = 113              | n = 115              | n = 118              | n = 113              | n = 112              | n = 82               |
| $\beta$ (95% CI)  | 0.03 (-0.00, 0.05)           | -1.36 (-2.66, -0.05) | -0.64 (-1.22, -0.05) | -0.21 (-0.93, 0.51)  | -0.99 (-2.23, 0.25)  | -2.57 (-4.43, -0.71) | -2.71 (-4.63, -0.80) | -0.75 (-1.29, -0.20) | -0.70 (-1.17, -0.23) | 38.27 (14.04, 62.51) |
| p value           | 0.094                        | 0.041                | 0.035                | 0.56                 | 0.12                 | 0.007                | 0.006                | 0.008                | <b>0.004</b>         | <b>0.002</b>         |
| <b>MCI</b>        | n = 57                       | n = 57               | n = 56               | n = 49               | n = 56               | n = 56               | n = 56               | n = 57               | n = 57               | n = 56               |
| $\beta$ (95% CI)  | 0.28 (-0.01, 0.57)           | -1.16 (-1.94, -0.38) | -0.26 (-0.77, 0.25)  | -0.28 (-0.69, 0.12)  | -0.79 (-1.85, 0.27)  | -0.66 (-2.43, 1.10)  | -1.32 (-3.38, 0.74)  | -0.01 (-0.47, 0.46)  | -0.14 (-0.65, 0.37)  | 15.16 (1.71, 28.60)  |
| p value           | 0.062                        | 0.005                | 0.32                 | 0.17                 | 0.14                 | 0.45                 | 0.20                 | 0.98                 | 0.58                 | 0.028                |

$\beta$ =regression coefficient; CI=confidence interval.  $\beta$  values, 95% CIs, and p values result from unadjusted linear regression models.  $\beta$  values are interpreted as the change in the mean value of the given disease indicator for each doubling of NfL concentration. p values < 0.005 are considered statistically significant after correcting for multiple testing are shown in bold. Nominally significant p values <0.05 are shown in italic. The FTD group includes patients with bvFTD, nfvPPA, svPPA, CBS or PSP-RS. CDR+NACC-FTLDsb, CDR® Dementia Staging Instrument plus behavior and language domains from the National Alzheimer’s Disease Coordinating Center FTLD module sum of boxes; MoCA, Montreal Cognitive Assessment; SNQ, Social Norms Questionnaire; MINT, Multilingual Naming Test; NAT, Northwestern Anagram Test; Trails B, Trail Making Test Part B. See also Tables 2 and S10.

**Table S12: Associations between baseline NFL concentrations and rates of change over time of disease indicators, Related to Table 2**

| Association between baseline NFL and rate of change over time in the given disease indicator |                     |                      |         |                                                                     |         |                                                                  |                      |         |                        |                                                                     |  |  |
|----------------------------------------------------------------------------------------------|---------------------|----------------------|---------|---------------------------------------------------------------------|---------|------------------------------------------------------------------|----------------------|---------|------------------------|---------------------------------------------------------------------|--|--|
| bvFTD patients                                                                               |                     |                      |         |                                                                     |         | Combined group of bvFTD, nfvPPA, svPPA, CBS, and PSP-RS patients |                      |         |                        |                                                                     |  |  |
| Disease indicator                                                                            | Unadjusted analysis |                      |         | Adjusting for age, gender, symptom duration, and years of education |         |                                                                  | Unadjusted analysis  |         |                        | Adjusting for age, gender, symptom duration, and years of education |  |  |
|                                                                                              | n                   | $\beta$ (95% CI)     | p value | $\beta$ (95% CI)                                                    | p value | n                                                                | $\beta$ (95% CI)     | p value | $\beta$ (95% CI)       | p value                                                             |  |  |
| CDR+NACC-FTLDSb                                                                              | 52                  | 1.33 (0.76, 1.90)    | <0.001  | 1.16 (0.48, 1.85)                                                   | 0.001   | 90                                                               | 1.07 (0.59, 1.56)    | <0.001  | 1.12 (0.56, 1.68)      | <0.001                                                              |  |  |
| MoCA                                                                                         | 40                  | -2.05 (-2.94, -1.17) | <0.001  | -2.03 (-3.02, -1.03)                                                | <0.001  | 69                                                               | -1.85 (-2.60, -1.10) | <0.001  | -2.01 (-2.84, -1.18)   | <0.001                                                              |  |  |
| SNQ                                                                                          | 33                  | -0.10 (-0.74, 0.54)  | 0.75    | 0.29 (-0.43, 1.02)                                                  | 0.42    | 52                                                               | -0.52 (-1.24, 0.19)  | 0.15    | 0.00 (-0.77, 0.78)     | 1.00                                                                |  |  |
| NAT                                                                                          | 29                  | -0.61 (-1.48, 0.27)  | 0.16    | -0.97 (-2.12, 0.18)                                                 | 0.093   | 44                                                               | -0.70 (-1.33, -0.06) | 0.032   | -0.67 (-1.49, 0.15)    | 0.11                                                                |  |  |
| MINT                                                                                         | 38                  | -1.37 (-2.40, -0.35) | 0.010   | -1.30 (-2.47, -0.13)                                                | 0.030   | 71                                                               | -0.90 (-1.62, -0.19) | 0.013   | -0.97 (-1.78, -0.17)   | 0.019                                                               |  |  |
| Phonemic fluency                                                                             | 38                  | -1.69 (-2.85, -0.52) | 0.006   | -0.88 (-2.20, 0.44)                                                 | 0.19    | 71                                                               | -1.45 (-2.34, -0.57) | 0.002   | -1.47 (-2.50, -0.43)   | 0.006                                                               |  |  |
| Category fluency                                                                             | 39                  | -3.95 (-5.21, -2.69) | <0.001  | -3.38 (-4.83, -1.93)                                                | <0.001  | 72                                                               | -3.28 (-4.32, -2.23) | <0.001  | -3.06 (-4.23, -1.89)   | <0.001                                                              |  |  |
| Digit span forward                                                                           | 39                  | -0.24 (-0.75, 0.27)  | 0.35    | -0.03 (-0.65, 0.58)                                                 | 0.91    | 72                                                               | -0.21 (-0.61, 0.18)  | 0.28    | -0.08 (-0.51, 0.36)    | 0.73                                                                |  |  |
| Digit span backward                                                                          | 39                  | -0.63 (-1.16, -0.09) | 0.024   | -0.51 (-1.15, 0.13)                                                 | 0.11    | 73                                                               | -0.35 (-0.76, 0.07)  | 0.10    | -0.46 (-0.93, 0.01)    | 0.057                                                               |  |  |
| Trails B                                                                                     | 25                  | 27.26 (6.64, 47.88)  | 0.012   | 33.59 (6.35, 60.83)                                                 | 0.018   | 51                                                               | 9.22 (-5.93, 24.37)  | 0.23    | 13.52 (-68.91, 190.90) | 0.13                                                                |  |  |

$\beta$ =regression coefficient; CI=confidence interval.  $\beta$  values, 95% CIs, and p values result from linear regression models.  $\beta$  values are interpreted as the change in the mean rate of change per year in the given outcome for each doubling of NFL concentration. p values < 0.005 are considered statistically significant after correcting for multiple testing. The FTD group includes patients with bvFTD, nfvPPA, svPPA, CBS or PSP-RS. CDR+NACC-FTLDSb, CDR® Dementia Staging Instrument plus behavior and language domains from the National Alzheimer's Disease Coordinating Center FTL D module sum of boxes; MoCA, Montreal Cognitive Assessment; SNQ, Social Norms Questionnaire; MINT, Multilingual Naming Test; NAT, Northwestern Anagram Test; Trails B, Trail Making Test Part B. See also Table 2.

**Table S13: Comparison of rate of change in NfL concentrations with controls for presymptomatic mutation carriers and patients with MCI, bvFTD, PPA or parkinsonian disorders, Related to Figures 3 and 4**

| Mutation Status                                     | n  | Median (minimum, maximum) rate of change per year in NfL concentration (pg/ml) | Unadjusted analysis |                  | Adjusting for age and gender |                  |
|-----------------------------------------------------|----|--------------------------------------------------------------------------------|---------------------|------------------|------------------------------|------------------|
|                                                     |    |                                                                                | $\beta$ (95% CI)    | p value          | $\beta$ (95% CI)             | p value          |
| Controls                                            | 69 | 0.3 (-6.4, 4.9)                                                                | 0.00 (reference)    | N/A              | 0.00 (reference)             | N/A              |
| All pre-symptomatic mutation carriers               | 52 | 0.6 (-10.1, 24.9)                                                              | 1.12 (-0.01, 2.24)  | 0.052            | 1.30 (0.13, 2.48)            | 0.029            |
| <i>C9orf72</i> mutation                             | 17 | 0.6 (-10.1, 11.3)                                                              | -0.11 (-1.29, 1.07) | 0.86             | 0.33 (-0.94, 1.59)           | 0.61             |
| <i>GRN</i> mutation                                 | 14 | 0.7 (-1.0, 7.7)                                                                | 1.63 (0.63, 2.62)   | <b>0.002</b>     | 1.35 (0.31, 2.38)            | 0.012            |
| <i>MAPT</i> mutation                                | 20 | 0.5 (-2.3, 4.9)                                                                | 0.63 (-0.12, 1.37)  | 0.097            | 0.69 (-0.11, 1.49)           | 0.092            |
| Non-converters                                      | 35 | 0.5 (-3.7, 11.3)                                                               | 0.33 (-0.39, 1.05)  | 0.36             | 0.42 (-0.34, 1.18)           | 0.28             |
| Phenoconverters                                     | 14 | 2.2 (-1.0, 24.9)                                                               | 1.88 (1.02, 2.73)   | <b>&lt;0.001</b> | 1.91 (1.04, 2.78)            | <b>&lt;0.001</b> |
| MCI                                                 | 18 | 1.9 (-0.9, 54.6)                                                               | 9.32 (5.44, 13.21)  | <b>&lt;0.001</b> | 8.87 (5.04, 12.71)           | <b>&lt;0.001</b> |
| bvFTD                                               | 35 | 2.8 (-3.8, 48.9)                                                               | 4.82 (2.49, 7.15)   | <b>&lt;0.001</b> | 5.50 (3.16, 7.84)            | <b>&lt;0.001</b> |
| No mutation                                         | 4  | 2.6 (1.1, 6.8)                                                                 | N/A                 | N/A              | N/A                          | N/A              |
| <i>C9orf72</i> , <i>GRN</i> or <i>MAPT</i> mutation | 31 | 3.0 (-3.8, 48.9)                                                               | 5.06 (2.59, 7.52)   | <b>&lt;0.001</b> | 5.87 (3.39, 8.35)            | <b>&lt;0.001</b> |
| <i>C9orf72</i> mutation                             | 13 | 1.2 (-3.8, 12.0)                                                               | 1.75 (0.46, 3.03)   | 0.008            | 1.79 (0.43, 3.15)            | 0.011            |
| <i>GRN</i> mutation                                 | 4  | 15.9 (3.2, 25.8)                                                               | N/A                 | N/A              | N/A                          | N/A              |
| <i>MAPT</i> mutation                                | 14 | 2.2 (-0.5, 48.9)                                                               | 5.32 (2.28, 8.37)   | <b>&lt;0.001</b> | 5.40 (2.38, 8.42)            | <b>&lt;0.001</b> |
| nfvPPA and svPPA                                    | 9  | 3.5 (1.0, 42.3)                                                                | 13.64 (9.92, 17.36) | <b>&lt;0.001</b> | 12.43 (8.31, 16.55)          | <b>&lt;0.001</b> |
| CBS and PSP-RS                                      | 9  | 0.4 (-16.0, 18.4)                                                              | 2.27 (-0.22, 4.77)  | 0.074            | 2.14 (-0.57, 4.86)           | 0.12             |

$\beta$ =regression coefficient; CI=confidence interval.  $\beta$  values, 95% CIs, and p values result from linear regression models.  $\beta$  values are interpreted as the difference in the mean rate of change per year in NfL concentration for the given group in comparison to controls. p values < 0.0039 are considered statistically significant after correcting for multiple testing. Rates of NfL change per year were calculated only for individuals with one or more NfL measurements at least one year from baseline. There was one presymptomatic mutation carrier with a mutation in *C9orf72* and in *GRN* for whom NfL rate of change could be calculated; this individual was only included in the “All pre-symptomatic mutation carriers” group. See also Figures 3 and 4.

**Table S14: Comparisons of rate of change in NfL concentrations between presymptomatic mutation carriers and other phenotype groups, Related to Figure 3**

| Analysis adjusted for age and gender (and symptom duration when relevant) |    |                                                                                |                             |                 |                   |                              |                            |
|---------------------------------------------------------------------------|----|--------------------------------------------------------------------------------|-----------------------------|-----------------|-------------------|------------------------------|----------------------------|
| Phenotype group                                                           | n  | Median (minimum, maximum) rate of change per year in NfL concentration (pg/ml) | p value vs. phenoconverters | p value vs. MCI | p value vs. bvFTD | p value vs. nfvPPA and svPPA | p value vs. CBS and PSP-RS |
| Presymptomatic non-converters                                             | 35 | 0.5 (-3.7, 11.3)                                                               | 0.008                       | 0.032           | <b>0.001</b>      | <b>0.003</b>                 | 0.38                       |
| Presymptomatic phenoconverters                                            | 14 | 2.2 (-1.0, 24.9)                                                               | ----                        | 0.40            | 0.40              | 0.23                         | 0.85                       |
| MCI                                                                       | 18 | 1.9 (-0.9, 54.6)                                                               | ----                        | ----            | 0.26              | 0.64                         | 0.11                       |
| bvFTD                                                                     | 35 | 2.8 (-3.8, 48.9)                                                               | ----                        | ----            | ----              | 0.025                        | 0.66                       |
| nfvPPA and svPPA                                                          | 9  | 3.5 (1.0, 42.3)                                                                | ----                        | ----            | ----              | ----                         | 0.032                      |
| CBS and PSP-RS                                                            | 9  | 0.4 (-16.0, 18.4)                                                              | ----                        | ----            | ----              | ----                         | ----                       |

p values result from linear regression models that were adjusted for age, gender, and symptom duration. p values < 0.0033 are considered statistically significant after correcting for multiple testing. Presymptomatic non-converters refers to presymptomatic mutation carriers who did not phenoconvert for at least one year from baseline. Presymptomatic phenoconverters refers to presymptomatic mutation carriers who phenoconverted after baseline. Rates of NfL change per year were calculated only for individuals with one or more NfL measurements at least one year from baseline. See also Figure 3.

**Table S15: Comparisons of rate of change in NfL concentration among pre-symptomatic individuals according to mutation status, Related to Figure 4**

|                         |    |                                                                                | Adjusting for age and gender    |                                  |
|-------------------------|----|--------------------------------------------------------------------------------|---------------------------------|----------------------------------|
| Phenotype group         | n  | Median (minimum, maximum) rate of change per year in NfL concentration (pg/ml) | p value vs. <i>GRN</i> mutation | p value vs. <i>MAPT</i> mutation |
| <i>C9orf72</i> mutation | 17 | 0.6 (-10.1, 11.3)                                                              | 0.66                            | 0.55                             |
| <i>GRN</i> mutation     | 14 | 0.7 (-1.0, 7.7)                                                                | ----                            | 0.63                             |
| <i>MAPT</i> mutation    | 20 | 0.5 (-2.3, 4.9)                                                                | ----                            | ----                             |

p values result from linear regression models that were adjusted for age and gender. p values < 0.0167 are considered statistically significant after correcting for multiple testing. Rates of NfL change per year were calculated only for individuals with one or more NfL measurements at least one year from baseline. See also Figure 4.
